# Supplementary material for: An iodine-mediated new avenue to sulfonylation employing N-hydroxy aryl sulfonamide as a sulfonylating agent
Source: Royal Society of Chemistry journal article supplement (doi:10.1039/d1ob00036e), 2021-01-01

## Supporting information

### **An iodine-mediated new avenue to sulfonylation employing *N*-hydroxy aryl sulfonamide as a sulfonylating agent**

Dushyant Singh Raghuvanshi<sup>[a\*]</sup>, Narsingh Verma<sup>[a,b]</sup>

<sup>a</sup>*Phytochemistry Division, CSIR-Central Institute of Medicinal and Aromatic Plants, P.O. CIMAP, Kukrail Road, Lucknow 226015*

<sup>b</sup>*Acedamy of Scientific and Innovative Research, Ghaziabad-221002, India*

[dushyant.bhu@gmail.com](mailto:dushyant.bhu@gmail.com)

## Table of Contents

|                                                              |                     |
|--------------------------------------------------------------|---------------------|
| 1. General Experiments.....                                  | S <sub>3</sub>      |
| 2. Reagents.....                                             | S <sub>3</sub>      |
| 3. Experimental procedure.....                               | S <sub>3-5</sub>    |
| 4. Spectral data.....                                        | S <sub>5-16</sub>   |
| 5. References.....                                           | S <sub>16-17</sub>  |
| 6. Copies of <sup>1</sup> H and <sup>13</sup> C spectra..... | S <sub>18-101</sub> |

## General Experimental:

All the reactions were carried out in 15 mL Ace-pressure tube with constant stirring using a Teflon-coated magnetic stirring bar. The reaction's heating source is a magnetic stirrer equipped with an oil bath and a temperature controller. Flash chromatography was performed using Merck silica gel (230-400 mesh). Thin-layer chromatography (TLC) was performed using Merck GF254 plates (thickness 0.25 mm). Visualization of spots on TLC plate was accomplished with UV. The chromatographic solvents are mentioned as v/v ratios. All the synthesized compounds were fully characterized by  $^1\text{H}$ ,  $^{13}\text{C}$  NMR, and further confirmed through ESI-MS and HRMS analyses. High resolution mass spectrometry (HRMS) was recorded on a SCIEX X 500R QTOF (TOF-MS) system with turbo V ion source with twin sprayer ESI probe and twin sprayer APCI probe. NMR spectra were recorded with Bruker 500 MHz spectrometers for  $^1\text{H}$  NMR, 125 MHz for  $^{13}\text{C}$  NMR respectively. Chemical shifts are reported in  $\delta$  (ppm) relative to TMS ( $^1\text{H}$ ),  $\text{CDCl}_3$  and  $\text{DMSO-D}_6$  ( $^{13}\text{C}$ ) as internal standards. Integrals are in accordance with assignments; coupling constants are given in Hz. Product yields refer to isolated yields after flash chromatography.

## Reagents:

All the chemicals, including thiophenol derivatives, iodine, hydroxylamine hydrochloride, potassium carbonate, sulfonyl chloride derivatives, and other chemicals, were procured from Sigma Aldrich, Alfa Aesar and TCI Chemicals and were used as received.

## Experimental Procedure

### Synthesis of N-hydroxy sulfonamide:

N-oxides was prepared by the reported procedure.<sup>1</sup>

### General Procedure for the Synthesis of Thiosulfonates from thiophenol

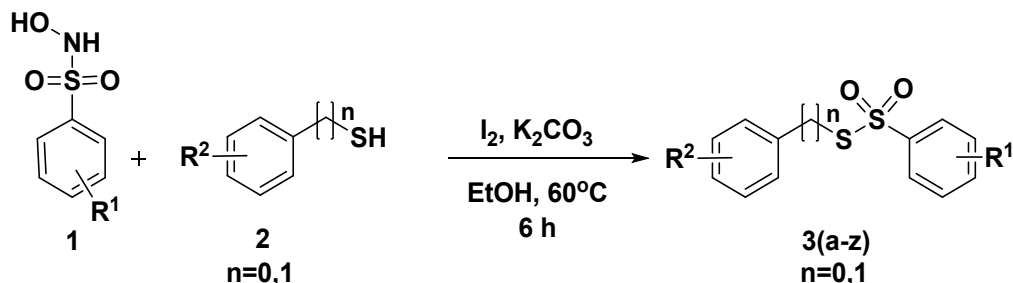

A mixture of thiophenol (1 mmol), N-hydroxy sulphonamide (1.5 mmol), iodine (1 mmol) and  $K_2CO_3$  (1 mmol) in EtOH (3mL), placed in a 15-mL Ace-pressure tube under aerobic condition, was stirred at 60°C in an oil bath for the time 6 h. After completion of the reaction (monitored by TLC), the reaction mixture was cooled to room temperature, and the solvent was removed under reduced pressure. The residue was quenched by the addition of a saturated sodium thiosulfate solution. The resulting mixture was extracted with ethyl acetate (3×20 mL) and the combined organic layer was washed with water, dried over anhydrous sodium sulfate, and filtered. The filtrate was concentrated under reduced pressure, and the residue was purified by flash chromatography.

### General Procedure for the Synthesis of $\beta$ -Iodovinyl Sulfones from Terminal Alkyne

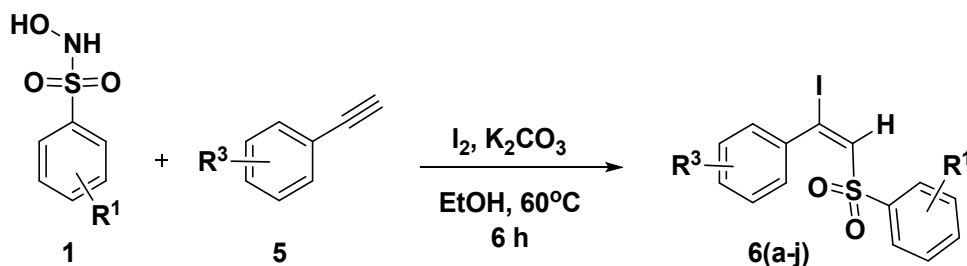

A mixture of alkynes (1 mmol), N-hydroxy sulphonamide (1.5 mmol), iodine (1.5 mmol) and  $K_2CO_3$  (1 mmol) in EtOH (3mL), placed in a 15-mL Ace-pressure tube under aerobic condition, was stirred at 60°C in an oil bath for the time 6 h. After completion of the reaction (monitored by TLC), the reaction mixture was cooled to room temperature and the solvent was removed under reduced pressure. The residue was quenched by the addition of a saturated sodium thiosulfate solution. The resulting mixture was extracted with ethyl acetate (3×20 mL) and the combined organic layer was washed with water, dried over anhydrous sodium sulfate, and filtered. The filtrate was concentrated under reduced pressure, and the residue was purified by flash chromatography.

### General Procedure for the Synthesis of Acetylenic Sulfones from Arylacetylenic acids

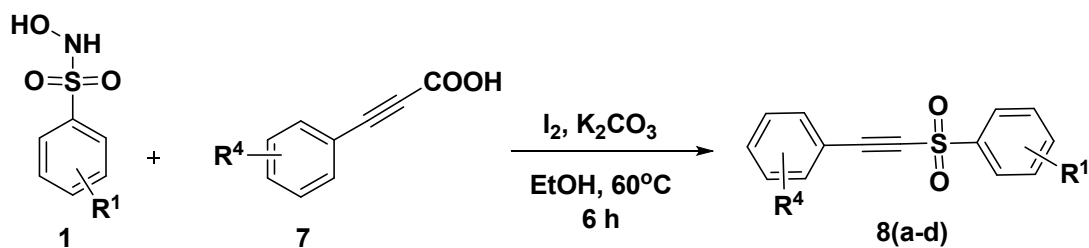

A mixture of Arylacetylenic acids (1 mmol), N-hydroxy sulphonamide (1.5 mmol), iodine (1 mmol) and  $K_2CO_3$  (1 mmol) in EtOH (3mL), placed in a 15-mL Ace-pressure tube under arobie condition, was stirred at 60°C in oil bath for the time 6 h. After completion of the reaction (monitored by TLC), the reaction mixture was cooled to room temperature and the solvent was removed under reduced pressure. The residue was quenched by the addition of a saturated sodium thiosulfate solution. The resulting mixture was extracted with ethyl acetate (3×20 mL) and the combined organic layer was washed with water, dried over anhydrous sodium sulfate, and filtered. The filtrate was concentrated under reduced pressure, and the residue was purified by flash chromatography.

### General Procedure for the Synthesis of 3-sulfonyl benzofuranderivative 10

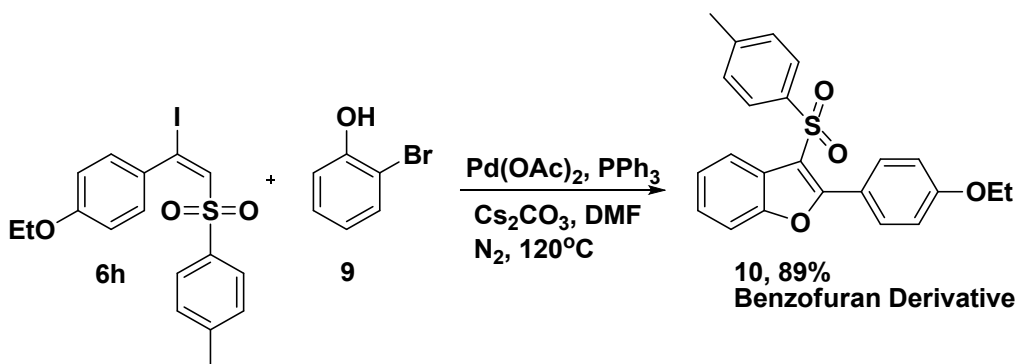

A mixture of **6h** (1 mmol), 2-bromophenol **9** (1.5 mmol), palladium acetate (10 mol%), triphenylphosphine (20 mol%), and  $CS_2CO_3$  (2 mmol) in DMF (3mL), placed in a 25-mL round bottom flask, was stirred at 120°C under nitrogen atmosphere for the time 6 h. After completion of the reaction (monitored by TLC), the reaction mixture was cooled to room temperature progress, and the mixture was quenched by the addition of water (20 mL) followed by extraction with EtOAc (3×30 mL). The combined organic layers were washed with brine (3×30 mL) and dried over anhydrous sodium sulfate and filtered. The filtrate was concentrated under reduced pressure, and the residue was purified by flash chromatography (silica gel 230–400 mesh, eluted with 20% to 25% ethyl acetate/hexane).

### Spectral data of the compounds:

#### 1. S-3-methoxyphenyl 4-methylbenzenesulfonothioate (3a)<sup>2</sup>

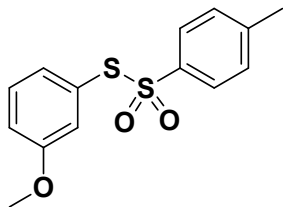

$^1\text{H}$  NMR (500 MHz,  $\text{CDCl}_3$ )  $\delta$  = 2.40 (s, 3H), 3.71 (s, 3H), 6.86-6.87 (m, 1H), 6.91-6.93 (m, 1H), 6.98-7.00 (m, 1H), 7.20-7.23 (m, 3H), 7.46-7.47 (m, 2H).

$^{13}\text{C}$  NMR (125 MHz,  $\text{CDCl}_3$ )  $\delta$  = 21.63, 55.40, 118.02, 120.88, 127.69, 128.73, 128.81, 129.38, 130.06, 140.34, 144.75, 159.85.

ESI-MS ( $\text{C}_{14}\text{H}_{14}\text{O}_3\text{S}_2$ ): 295  $[\text{M}+\text{H}]^+$ .

**2. S-3-methoxyphenyl benzenesulfonothioate (3b)<sup>3</sup>**

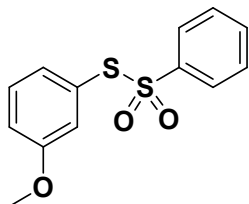

$^1\text{H}$  NMR (500 MHz,  $\text{CDCl}_3$ )  $\delta$  = 3.70 (s, 3H), 6.84-7.00 (m, 3H), 7.20-7.23 (m, 1H), 7.41-7.44 (m, 2H), 7.56-7.59 (m, 3H).

$^{13}\text{C}$  NMR (125 MHz,  $\text{CDCl}_3$ )  $\delta$  = 55.44, 118.14, 120.84, 127.65, 128.76, 128.84, 130.14, 133.68, 136.59, 142.93, 159.87.

ESI-MS ( $\text{C}_{13}\text{H}_{12}\text{O}_3\text{S}_2$ ): 281  $[\text{M}+\text{H}]^+$ .

**3. S-3-methoxyphenyl 4-nitrobenzenesulfonothioate (3c)**

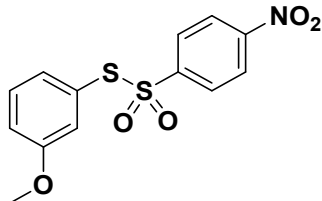

$^1\text{H}$  NMR (500 MHz,  $\text{CDCl}_3$ )  $\delta$  = 3.79 (s, 3H), 6.90 (d,  $J=7.5$  Hz, 1H), 6.98-6.99 (m, 1H), 7.06-7.08 (m, 1H), 7.28 (d,  $J=8.5$  Hz, 1H), 7.78 (d,  $J=9.0$  Hz, 2H), 8.28 (d,  $J=9.0$  Hz, 2H).

$^{13}\text{C}$  NMR (125 MHz,  $\text{CDCl}_3$ )  $\delta$  = 55.56, 118.29, 121.23, 124.10, 127.66, 128.41, 128.81, 130.48, 147.93, 150.41, 160.20.

HRMS (ESI):  $m/z$   $[\text{M}+\text{H}]^+$  calcd for  $\text{C}_{13}\text{H}_{11}\text{NO}_5\text{S}_2$  : 326.0112, found: 326.0102.

**4. S-3-methoxyphenyl methanesulfonothioate (3d)**

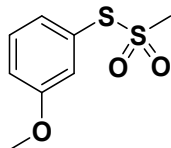

$^1\text{H}$  NMR (500 MHz,  $\text{CDCl}_3$ )  $\delta$  = 3.19(s, 3H), 3.84 (s, 3H), 7.06-7.08 (m, 1H), 7.23-7.28 (m, 2H), 7.36-7.39 (m, 1H).

$^{13}\text{C}$  NMR (125 MHz,  $\text{CDCl}_3$ )  $\delta$  = 47.49, 55.59, 117.81, 121.10, 128.15, 128.74, 130.56, 160.26.

HRMS (ESI):  $m/z$   $[M+H]^+$  calcd for  $C_8H_{10}O_3S_2$  : 219.0171, found: 219.0142.

**5. S-3-methoxyphenyl naphthalene-2-sulfonothioate (3e)**

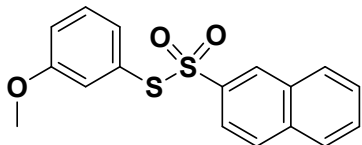

$^1H$  NMR (500 MHz,  $CDCl_3$ )  $\delta$  = 3.52 (s, 3H), 6.78-6.79 (m, 1H), 6.88-6.90 (m, 1H), 6.96-6.98 (m, 1H), 7.14-7.17 (m, 1H), 7.56-7.59 (m, 1H), 7.63-7.70 (m, 2H), 7.78-7.80 (m, 1H), 7.88-7.92 (m, 2H), 7.97 (d,  $J=1.5$  Hz, 1H).

$^{13}C$  NMR (125 MHz,  $CDCl_3$ )  $\delta$  = 55.26, 118.25, 120.78, 122.43, 127.81, 127.94, 128.79, 128.83, 129.34, 129.46, 129.49, 130.11, 131.55, 135.11, 139.45, 159.84.

HRMS (ESI):  $m/z$   $[M+H]^+$  calcd for  $C_{17}H_{14}O_3S_2$  : 331.0418, found: 331.0417.

**6. S-phenyl 4-methylbenzenesulfonothioate (3f)<sup>2</sup>**

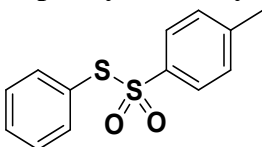

$^1H$  NMR (500 MHz,  $CDCl_3$ )  $\delta$  = 2.43 (s, 3H), 7.21-7.22 (m, 2H), 7.33-7.39 (m, 4H), 7.44-7.50 (m, 3H).

$^{13}C$  NMR (125 MHz,  $CDCl_3$ )  $\delta$  = 21.69, 127.59, 128.01, 129.41, 129.43, 130.23, 131.36, 136.60, 140.26, 144.78.

ESI-MS ( $C_{13}H_{12}O_2S_2$ ): 265  $[M+H]^+$ .

**7. S-phenyl methanesulfonothioate(3g)<sup>4</sup>**

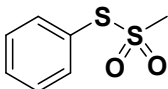

$^1H$  NMR (500 MHz,  $CDCl_3$ )  $\delta$  = 3.18 (s, 3H), 7.46-7.56 (m, 3H), 7.70-7.73 (m, 2H).

$^{13}C$  NMR (125 MHz,  $CDCl_3$ )  $\delta$  = 47.44, 127.98, 129.92, 131.66, 136.24.

ESI-MS ( $C_7H_8O_2S_2$ ): 188  $[M+H]^+$ .

**8. S-phenyl naphthalene-2-sulfonothioate (3h)<sup>5</sup>**

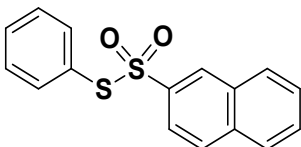

$^1H$  NMR (500 MHz,  $CDCl_3$ )  $\delta$  = 7.26-7.29 (m, 2H), 7.32-7.34 (m, 2H), 7.43-7.46 (m, 1H), 7.56-7.59 (m, 1H), 7.64-7.68 (m, 2H), 7.76-7.86 (m, 1H), 7.89-7.91 (m, 2H), 7.95 (d,  $J=1.5$  Hz, 1H).

$^{13}C$  NMR (125 MHz,  $CDCl_3$ )  $\delta$  = 122.36, 127.80, 127.98, 128.03, 129.05, 129.32, 129.37, 129.39, 129.46, 129.48, 129.56, 131.49, 131.56, 135.12, 136.65, 139.56.

ESI-MS ( $C_{16}H_{12}O_2S_2$ ): 301  $[M+H]^+$ .

**9. S-4-hydroxyphenyl 4-methylbenzenesulfonothioate (3i)<sup>8</sup>**

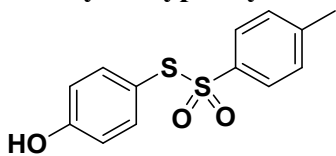

<sup>1</sup>H NMR (500 MHz, CDCl<sub>3</sub>) δ = 2.41 (s, 3H), 3.50 (s, 1H), 6.76 (d, *J*=8.5 Hz, 2H), 7.19-7.23 (m, 4H), 7.45 (d, *J*=8.5 Hz, 2H).

<sup>13</sup>C NMR (125 MHz, CDCl<sub>3</sub>) δ = 21.65, 116.67, 118.20, 127.63, 129.47, 138.59, 140.10, 144.78, 159.24.

ESI-MS (C<sub>13</sub>H<sub>12</sub>O<sub>3</sub>S<sub>2</sub>): 281 [M+H]<sup>+</sup>.

**10. S-4-hydroxyphenyl benzenesulfonothioate(3j)<sup>3,4</sup>**

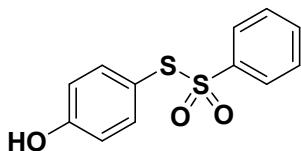

<sup>1</sup>H NMR (500 MHz, CDCl<sub>3</sub>) δ = 3.50 (s, 1H), 6.75-6.78 (m, 2H), 7.18-7.20 (m, 2H), 7.42-7.45 (m, 2H), 7.56-7.59 (m, 3H).

<sup>13</sup>C NMR (125 MHz, CDCl<sub>3</sub>) δ = 116.69, 118.06, 127.60, 128.87, 133.65, 138.60, 142.82, 159.27.

ESI-MS (C<sub>12</sub>H<sub>10</sub>O<sub>3</sub>S<sub>2</sub>): 265 [M-H]<sup>+</sup>.

**11. S-4-hydroxyphenyl 3-(trifluoromethyl)benzenesulfonothioate (3k)**

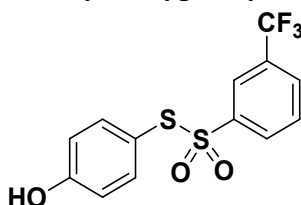

<sup>1</sup>H NMR (500 MHz, CDCl<sub>3</sub>) δ = 7.29-7.34 (m, 3H), 7.38-7.47 (m, 3H), 7.53-7.57 (m, 2H).

<sup>13</sup>C NMR (125 MHz, CDCl<sub>3</sub>) δ = 127.54, 127.84, 127.97, 128.86, 129.23, 129.29, 129.48, 129.76, 131.47, 133.73, 136.57, 142.95.

HRMS (ESI): *m/z* [M]<sup>+</sup> calcd for C<sub>13</sub>H<sub>9</sub>F<sub>3</sub>O<sub>3</sub>S<sub>2</sub> : 333.9945, found: 333.9938.

**12. S-4-hydroxyphenyl 3-nitrobenzenesulfonothioate(3l)**

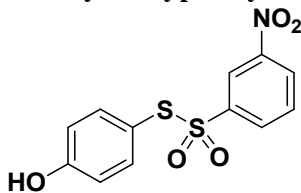

<sup>1</sup>H NMR (500 MHz, CDCl<sub>3</sub>) δ = 3.50 (s, 1H), 6.75-7.77 (m, 2H), 7.32-7.39 (m, 3H), 7.63-7.66 (m, 1H), 8.23-8.30 (m, 2H).

<sup>13</sup>C NMR (125 MHz, CDCl<sub>3</sub>) δ = 116.51, 126.03, 126.10, 126.36, 127.47, 131.77, 134.14, 137.52, 145.37, 156.29.

HRMS (ESI): *m/z* [M+Na]<sup>+</sup> calcd for C<sub>12</sub>H<sub>9</sub>NO<sub>5</sub>S<sub>2</sub> : 333.9820, found: 333.9815.



**13. S-4-hydroxyphenyl 4-nitrobenzenesulfonylthioate (3m)**

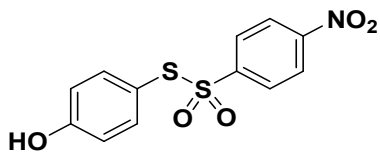

$^1\text{H}$  NMR (500 MHz,  $\text{CDCl}_3$ +DSMO)  $\delta$  = 6.66-6.74 (m, 2H), 7.01-7.07 (m, 2H), 7.60-7.65 (m, 2H), 8.13-8.18 (m, 2H), 9.60 (s, 1H).

$^{13}\text{C}$  NMR (125 MHz,  $\text{CDCl}_3$ +DSMO)  $\delta$  = 115.24, 117.13, 123.99, 128.77, 138.29, 147.89, 150.23, 161.40.

HRMS (ESI):  $m/z$   $[\text{M}+\text{Na}]^+$  calcd for  $\text{C}_{12}\text{H}_9\text{NO}_5\text{S}_2$  : 333.9820, found: 333.9815.

**14. S-4-hydroxyphenyl 4-tert-butylbenzenesulfonylthioate (3n)**

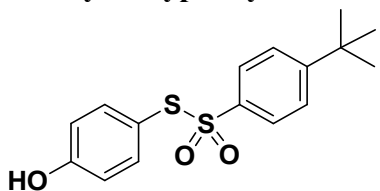

$^1\text{H}$  NMR (500 MHz,  $\text{CDCl}_3$ )  $\delta$  = 1.32 (s, 9H), 6.76-6.78 (m, 2H), 7.18 (d,  $J=8.5$  Hz, 2H), 7.43 (d,  $J=8.5$  Hz, 2H), 7.50 (d,  $J=8.5$  Hz, 2H).

$^{13}\text{C}$  NMR (125 MHz,  $\text{CDCl}_3$ )  $\delta$  = 31.05, 35.33, 116.74, 117.94, 125.91, 127.47, 138.62, 139.81, 157.93, 159.39.

HRMS (ESI):  $m/z$   $[\text{M}+\text{H}]^+$  calcd for  $\text{C}_{16}\text{H}_{18}\text{O}_3\text{S}_2$  : 323.0731, found: 323.0760.

**15. S-4-hydroxyphenyl methanesulfonylthioate (3o)**

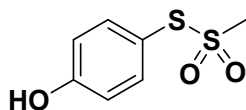

$^1\text{H}$  NMR (500 MHz,  $\text{CDCl}_3$ + $\text{CD}_3\text{OD}$ )  $\delta$  = 3.18 (s, 3H), 6.91-6.93 (m, 2H), 7.52-7.55 (m, 2H).

$^{13}\text{C}$  NMR (125 MHz,  $\text{CDCl}_3$ + $\text{CD}_3\text{OD}$ )  $\delta$  = 46.16, 116.29, 116.68, 133.04, 137.92, 160.54

HRMS (ESI):  $m/z$   $[\text{M}+\text{H}]^+$  calcd for  $\text{C}_7\text{H}_8\text{O}_3\text{S}_2$  : 204.9915, found: 204.9937 and  $m/z$   $[\text{M}+\text{Na}]^+$  calcd for  $\text{C}_7\text{H}_8\text{O}_3\text{S}_2$  : 226.9817, found: 226.9806.

**16. S-4-chlorophenyl 4-methylbenzenesulfonylthioate (3p)<sup>2</sup>**

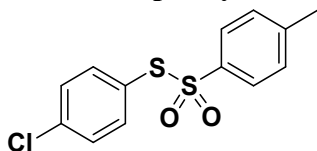

$^1\text{H}$  NMR (500 MHz,  $\text{CDCl}_3$ )  $\delta$  = 2.49 (s, 3H), 7.22 (d,  $J=8.0$  Hz, 2H), 7.28-7.32 (m, 4H), 7.46-7.47 (dd,  $J_1=2.0$  Hz,  $J_2=7.0$  Hz, 2H).

$^{13}\text{C}$  NMR (125 MHz,  $\text{CDCl}_3$ )  $\delta$  = 21.67, 126.58, 127.62, 129.53, 129.70, 137.71, 138.19, 140.25, 145.0.

ESI-MS ( $\text{C}_{13}\text{H}_{11}\text{ClO}_2\text{S}_2$ ): 320  $[\text{M}+\text{Na}]^+$ .

**17. S-4-chlorophenyl benzenesulfonylthioate (3q)<sup>4</sup>**

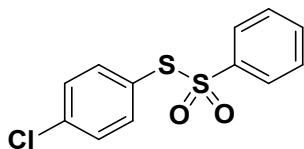

<sup>1</sup>H NMR (500 MHz, CDCl<sub>3</sub>) δ = 7.27-7.32 (m, 4H), 7.43-7.46 (t, *J* = 7.5 Hz, 2H), 7.58-7.61 (m, 3H)

<sup>13</sup>C NMR (125 MHz, CDCl<sub>3</sub>) δ = 126.38, 127.58, 128.95, 129.75, 133.84, 137.71, 138.32, 142.93

ESI-MS (C<sub>12</sub>H<sub>9</sub>ClO<sub>2</sub>S<sub>2</sub>): 285 [M+H]<sup>+</sup>.

**18. S-4-chlorophenyl methanesulfonylthioate (3r)<sup>4</sup>**

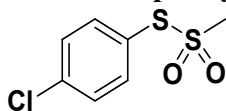

<sup>1</sup>H NMR (500 MHz, CDCl<sub>3</sub>) δ = 3.19 (s, 3H), 7.45-7.47 (m, 2H), 7.62-7.65 (m, 2H).

<sup>13</sup>C NMR (125 MHz, CDCl<sub>3</sub>) δ = 47.62, 126.38, 130.22, 137.37, 138.58.

ESI-MS (C<sub>7</sub>H<sub>7</sub>ClO<sub>2</sub>S<sub>2</sub>): 244 [M+Na]<sup>+</sup>.

**19. S-4-chlorophenyl naphthalene-2-sulfonylthioate (3s)**

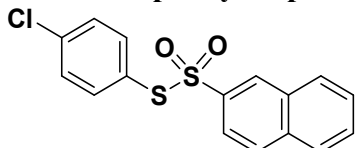

<sup>1</sup>H NMR (500 MHz, CDCl<sub>3</sub>) δ = 7.60-7.70 (m, 4H), 7.83-7.84 (m, 2H), 7.90-7.94 (m, 3H), 8.00 (d, *J* = 1.5 Hz, 2H).

<sup>13</sup>C NMR (125 MHz, CDCl<sub>3</sub>) δ = 122.29, 126.51, 127.92, 127.99, 129.32, 129.50, 129.57, 129.61, 129.74, 131.58, 135.19, 137.79, 138.33, 139.53.

HRMS (ESI): *m/z* [M+H]<sup>+</sup> calcd for C<sub>16</sub>H<sub>11</sub>ClO<sub>2</sub>S<sub>2</sub> : 334.9889, found: 334.9959.

**20. S-p-tolyl 4-methylbenzenesulfonylthioate (3t, 4a)<sup>2,3</sup>**

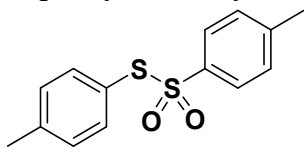

<sup>1</sup>H NMR (500 MHz, CDCl<sub>3</sub>) δ = 2.37 (s, 3H), 2.41 (s, 3H), 7.12 (d, *J* = 8.0, 2H), 7.20-7.24 (m, 4H), 7.44-7.46 (m, 2H).

<sup>13</sup>C NMR (125 MHz, CDCl<sub>3</sub>) δ = 21.50, 21.68, 124.57, 127.60, 129.38, 130.22, 136.50, 140.43, 142.08, 144.62.

ESI-MS (C<sub>14</sub>H<sub>14</sub>O<sub>2</sub>S<sub>2</sub>): 301 [M+Na]<sup>+</sup>.

**21. S-p-tolylbenzenesulfonylthioate (3u)<sup>4</sup>**

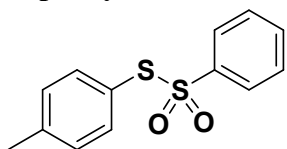

$^1\text{H}$  NMR (500 MHz,  $\text{CDCl}_3$ )  $\delta$  = 2.37 (s, 3H), 7.12 (d,  $J=8.0$ , 2H), 7.21-7.23 (m, 2H), 7.40-7.43 (m, 2H), 7.55-7.58 (m, 3H).

$^{13}\text{C}$  NMR (125 MHz,  $\text{CDCl}_3$ )  $\delta$  = 21.46, 124.43, 127.57, 128.79, 129.37, 130.25, 133.53, 136.49, 142.18, 143.16.

ESI-MS ( $\text{C}_{13}\text{H}_{12}\text{O}_2\text{S}_2$ ): 265  $[\text{M}+\text{H}]^+$ .

**22. S-p-tolyl 3-(trifluoromethyl)benzenesulfonothioate (3v)**

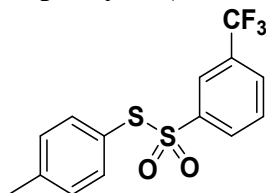

$^1\text{H}$  NMR (500 MHz,  $\text{CD}_3\text{OD}$ )  $\delta$  = 2.38 (s, 3H), 7.15 (d,  $J=8.0$ , 2H), 7.20-7.23 (m, 2H), 7.59-7.63 (m, 2H), 7.81-8.83 (m, 2H).

$^{13}\text{C}$  NMR (125 MHz,  $\text{CD}_3\text{OD}$ )  $\delta$  = 21.40, 119.71, 121.88, 123.83, 124.05, 124.85, 124.88, 124.91, 124.94, 127.61, 129.37, 129.77, 129.99, 130.02, 130.05, 130.20, 130.49, 130.95, 131.21, 131.48, 131.75, 136.45, 142.82, 143.75.

HRMS (ESI):  $m/z$   $[\text{M}+\text{H}]^+$  calcd for  $\text{C}_{14}\text{H}_{11}\text{F}_3\text{O}_2\text{S}_2$ : 333.0186, found: 333.0225

**23. S-benzyl 4-methylbenzenesulfonothioate (3w)<sup>6,7</sup>**

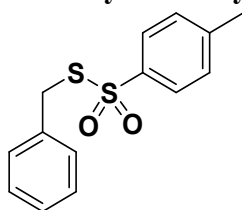

$^1\text{H}$  NMR (500 MHz,  $\text{CDCl}_3$ )  $\delta$  = 2.43 (s, 3H), 4.25 (s, 2H), 7.13-7.28 (m, 7H), 7.72 (d,  $J=8.0$ , Hz, 2H).

$^{13}\text{C}$  NMR (125 MHz,  $\text{CDCl}_3$ )  $\delta$  = 21.63, 40.29, 127.02, 127.96, 128.78, 129.12, 129.74, 133.74, 136.51, 142.08, 144.57, 144.65.

ESI-MS ( $\text{C}_{14}\text{H}_{14}\text{O}_2\text{S}_2$ ): 301  $[\text{M}+\text{Na}]^+$ .

**24. S-benzyl benzenesulfonothioate (3x)<sup>4,7</sup>**

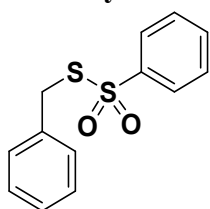

$^1\text{H}$  NMR (500 MHz,  $\text{CDCl}_3$ )  $\delta$  = 4.27 (s, 2H), 7.16-7.23 (m, 4H), 7.33-7.49 (m, 3H), 7.55-7.60 (m, 1H), 7.82-7.84 (m, 2H).

$^{13}\text{C}$  NMR (125 MHz,  $\text{CDCl}_3$ )  $\delta$  = 40.40, 126.90, 128.04, 128.80, 129.09, 129.16, 133.51, 136.60, 144.94.

ESI-MS ( $\text{C}_{13}\text{H}_{12}\text{O}_2\text{S}_2$ ): 265  $[\text{M}+\text{H}]^+$ .

**25. S-benzyl 4-nitrobenzenesulfonothioate (3y)<sup>7</sup>**

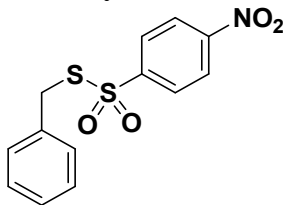

<sup>1</sup>H NMR (500 MHz, CDCl<sub>3</sub>) δ = 4.34 (s, 2H), 7.15-7.21 (m, 5H), 7.84-7.86 (m, 2H), 8.18-8.21 (m, 2H)

<sup>13</sup>C NMR (125 MHz, CDCl<sub>3</sub>) δ = 40.98, 124.23, 127.99, 128.26, 128.83, 129.10, 133.19, 150.10, 150.17

ESI-MS (C<sub>13</sub>H<sub>11</sub>NO<sub>4</sub>S<sub>2</sub>): 332 [M+Na]<sup>+</sup>.

**26. (E)-S-2-(benzylideneamino)phenyl 4-methylbenzenesulfonothioate (3z)**

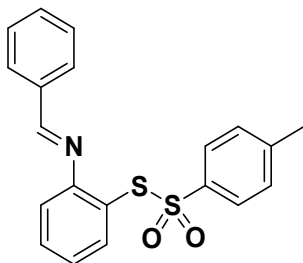

No reaction (nr)

**27. (E)-1-(2-iodo-2-phenylvinylsulfonyl)-4-methylbenzene (6a)<sup>9</sup>**

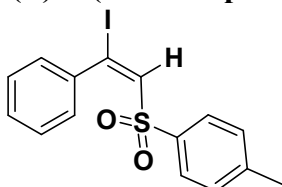

<sup>1</sup>H NMR (500 MHz, CDCl<sub>3</sub>) δ = 2.39 (s, 3H), 7.17-7.23 (m, 4H), 7.26-7.31 (m, 3H), 7.35 (s, 1H), 7.44-7.46 (m, 2H).

<sup>13</sup>C NMR (125 MHz, CDCl<sub>3</sub>) δ = 21.62, 114.15, 127.72, 127.89, 127.92, 129.67, 129.78, 137.38, 139.69, 141.30, 144.57.

ESI-MS (C<sub>9</sub>H<sub>9</sub>IO<sub>2</sub>S): 384 [M+H]<sup>+</sup>.

**28. (E)-1-(1-iodo-2-(phenylsulfonyl)vinyl)benzene (6b)<sup>9</sup>**

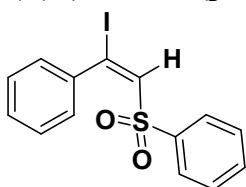

<sup>1</sup>H NMR (500 MHz, CDCl<sub>3</sub>) δ = 7.20-7.22 (m, 2H), 7.25-7.32 (m, 3H), 7.36-7.40 (m, 3H), 7.52-7.56 (m, 3H).

<sup>13</sup>C NMR (125 MHz, CDCl<sub>3</sub>) δ = 114.77, 127.69, 127.83, 128.00, 129.04, 129.86, 133.51, 139.60, 140.25, 141.13.

ESI-MS (C<sub>9</sub>H<sub>9</sub>IO<sub>2</sub>S): 368 [M-H]<sup>+</sup>.

**29. (E)-1-(1-iodo-2-(methylsulfonyl)vinyl)benzene (6c)<sup>10a</sup>**

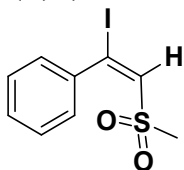

<sup>1</sup>H NMR (500 MHz, CDCl<sub>3</sub>) δ = 2.65 (s, 3H), 7.30 (s, 1H), 7.37-7.40 (m, 3H), 7.44-7.47 (m, 2H).

<sup>13</sup>C NMR (125 MHz, CDCl<sub>3</sub>) δ = 43.08, 114.88, 127.87, 128.36, 130.42, 139.47, 140.36

ESI-MS (C<sub>9</sub>H<sub>9</sub>IO<sub>2</sub>S): 330 [M+Na]<sup>+</sup>.

**30. (E)-2-(2-iodo-2-phenylvinylsulfonyl)naphthalene(6d)<sup>9</sup>**

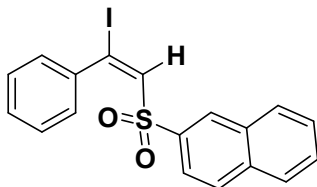

<sup>1</sup>H NMR (500 MHz, CDCl<sub>3</sub>) δ = 7.17-7.25 (m, 5H), 7.46 (s, 1H), 7.55-7.66 (m, 3H), 7.77-7.78 (m, 1H), 7.85 (d, *J*=8.5 Hz, 2H), 7.99 (d, *J*=1.5 Hz, 1H).

<sup>13</sup>C NMR (125 MHz, CDCl<sub>3</sub>) δ = 114.91, 122.41, 127.60, 127.66, 127.90, 129.36, 129.40, 129.41, 129.92, 130.02, 131.95, 135.10, 136.82, 139.48, 141.27.

ESI-MS (C<sub>18</sub>H<sub>13</sub>IO<sub>2</sub>S): 420 [M+H]<sup>+</sup>.

**31. (E)-1-(2-iodo-2-(4-methoxyphenyl)vinylsulfonyl)-4-methylbenzene (6e)<sup>9</sup>**

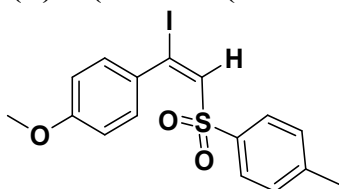

<sup>1</sup>H NMR (500 MHz, CDCl<sub>3</sub>) δ = 2.39 (s, 3H), 3.82 (s, 3H), 6.78-6.80 (m, 2H), 7.19-7.28 (m, 5H), 7.48-7.50 (m, 2H).

<sup>13</sup>C NMR (125 MHz, CDCl<sub>3</sub>) δ = 21.61, 55.40, 113.26, 114.87, 127.83, 129.64, 129.97, 131.89, 137.57, 140.34, 144.49, 160.87

ESI-MS (C<sub>16</sub>H<sub>15</sub>IO<sub>3</sub>S): 412 [M-H]<sup>+</sup>.

**32. (E)-1-(1-iodo-2-(phenylsulfonyl)vinyl)-4-methoxybenzene (6f)<sup>11</sup>**

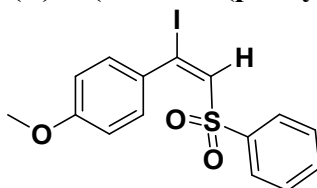

<sup>1</sup>H NMR (500 MHz, CDCl<sub>3</sub>) δ = 3.82 (s, 3H), 6.85-6.88 (m, 2H), 7.45-7.48 (m, 2H), 7.56-7.60 (m, 2H), 7.65-7.68 (m, 2H), 8.06-8.07 (m, 2H).

$^{13}\text{C}$  NMR (125 MHz,  $\text{CDCl}_3$ )  $\delta$  = 55.47, 84.65, 94.70, 109.54, 114.46, 127.28, 129.31, 133.95, 134.72, 142.18, 162.22.

ESI-MS ( $\text{C}_{15}\text{H}_{13}\text{IO}_3\text{S}$ ): 420  $[\text{M}+\text{Na}]^+$ .

**33. (E)-1-(1-iodo-2-(methylsulfonyl)vinyl)-4-methoxybenzene (6g)**

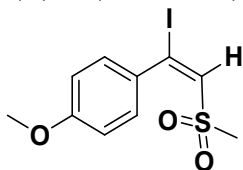

$^1\text{H}$  NMR (500 MHz,  $\text{CDCl}_3$ )  $\delta$  = 3.27 (s, 3H), 3.84 (s, 3H), 6.86-6.92 (m, 3H), 7.50-7.53 (m, 2H)

$^{13}\text{C}$  NMR (125 MHz,  $\text{CDCl}_3$ )  $\delta$  = 46.91, 55.51, 109.10, 113.67, 114.59, 130.19, 134.84, 139.36

HRMS (ESI):  $m/z$   $[\text{M}+\text{H}]^+$  calcd for  $\text{C}_{10}\text{H}_{11}\text{IO}_3\text{S}$  : 338.9507, found: 338.9552

**34. (E)-1-ethoxy-4-(1-iodo-2-tosylvinyl)benzene (6h)<sup>10a</sup>**

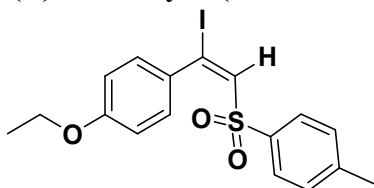

$^1\text{H}$  NMR (500 MHz,  $\text{CDCl}_3$ )  $\delta$  = 1.41-1.44 (t,  $J=7.0$  Hz, 3H), 2.39 (s, 3H), 4.03-4.07 (q,  $J=7.0$  Hz, 2H), 6.76-6.78 (m, 2H), 7.19-7.24 (m, 4H), 7.28 (s, 1H), 7.48 (d,  $J=8.0$  Hz, 2H).

$^{13}\text{C}$  NMR (125 MHz,  $\text{CDCl}_3$ )  $\delta$  = 14.72, 21.62, 63.64, 113.71, 115.06, 127.84, 129.62, 130.00, 131.66, 137.59, 140.24, 144.44, 160.26.

ESI-MS ( $\text{C}_{17}\text{H}_{17}\text{IO}_3\text{S}$ ): 340  $[\text{M}+\text{Na}]^+$ .

**NOE of compound 6h:<sup>10b</sup>**

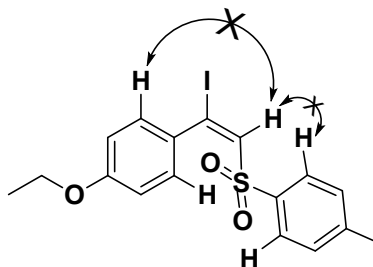

To confirm the compound **6** configurations, the olefin hydrogen of the product **6h** was double irradiated and found to have no enhancement with any hydrogen of the product. It found that product **6** is E-configuration rather than Z-configuration.

**35. (E)-1-ethoxy-4-(1-iodo-2-(phenylsulfonyl)vinyl)benzene (6i)**

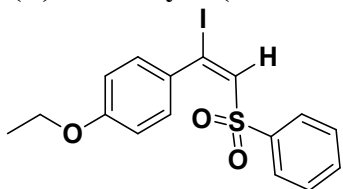

$^1\text{H}$  NMR (500 MHz,  $\text{CDCl}_3$ )  $\delta$  = 1.40-1.43 (t,  $J=7.0$  Hz, 3H), 4.02-4.06 (q,  $J=7.0$  Hz, 2H), 6.76 (d,  $J=9.0$  Hz, 2H), 7.19-7.22 (m, 2H), 7.31 (s, 1H), 7.37-7.41(m, 2H), 7.52-7.55 (m, 1H), 7.59-7.61 (m, 2H).

$^{13}\text{C}$  NMR (125 MHz,  $\text{CDCl}_3$ )  $\delta$  = 14.73, 63.66, 113.77, 114.90, 115.65, 127.78, 128.98, 129.99, 131.58, 133.42, 140.47, 160.29.

HRMS (ESI):  $m/z$   $[\text{M}+\text{H}]^+$  calcd for  $\text{C}_{16}\text{H}_{15}\text{IO}_3\text{S}$  : 414.9820, found: 414.9857.

**36. (E)-1-ethoxy-4-(1-iodo-2-(4-nitrophenylsulfonyl)vinyl)benzene (6j)**

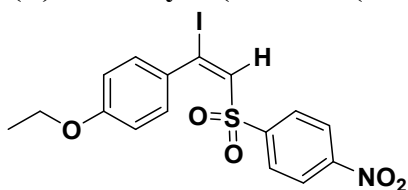

$^1\text{H}$  NMR (500 MHz,  $\text{CDCl}_3$ )  $\delta$  = 1.42-1.45 (q,  $J=7.0$  Hz, 3H), 4.02-4.06 (q,  $J=7.0$  Hz, 2H), 6.73-6.76 (m, 2H), 7.14-7.17 (m, 2H), 7.35 (s, 1H), 7.71-7.73(m, 2H), 8.17-8.19 (m, 2H)

$^{13}\text{C}$  NMR (125 MHz,  $\text{CDCl}_3$ )  $\delta$  = 14.66, 63.82, 113.88, 117.89, 124.26, 126.67, 129.17, 130.02, 131.20, 139.19, 146.08, 160.68.

HRMS (ESI):  $m/z$   $[\text{M}+\text{Na}]^+$  calcd for  $\text{C}_{16}\text{H}_{14}\text{INO}_5\text{S}$  : 481.9671, found: 481.9648.

**37. 1-methyl-4-(phenylethynylsulfonyl)benzene (8a)<sup>11</sup>**

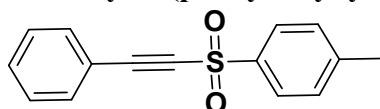

$^1\text{H}$  NMR (500 MHz,  $\text{CDCl}_3$ )  $\delta$  = 2.46 (s, 3H), 7.34-7.39 (m, 4H), 7.44-7.48 (m, 1H), 7.50-7.52 (m, 2H), 7.95-7.96 (m, 2H).

$^{13}\text{C}$  NMR (125 MHz,  $\text{CDCl}_3$ )  $\delta$  = 21.72, 85.66, 92.97, 118.07, 127.50, 128.66, 129.99, 131.44, 132.72, 139.04, 145.34.

ESI-MS ( $\text{C}_{15}\text{H}_{12}\text{O}_2\text{S}$ ): 255  $[\text{M}-\text{H}]^+$ .

**38. (phenylethynylsulfonyl)benzene (8b)<sup>11</sup>**

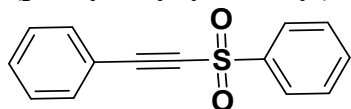

$^1\text{H}$  NMR (500 MHz,  $\text{CDCl}_3$ )  $\delta$  = 7.35-7.38 (m, 2H), 7.45-7.49 (m, 1H), 7.52-7.53 (m, 2H), 7.58-7.61 (m, 2H), 7.67-7.70 (m, 1H), 8.07-8.09 (s, 2H).

$^{13}\text{C}$  NMR (125 MHz,  $\text{CDCl}_3$ )  $\delta$  = 85.38, 93.50, 117.94, 127.42, 128.69, 129.37, 131.56, 132.77, 134.13, 141.90.

ESI-MS ( $\text{C}_{14}\text{H}_{10}\text{O}_2\text{S}$ ): 243  $[\text{M}+\text{H}]^+$ , 265  $[\text{M}+\text{Na}]^+$ .

### 39. 2-(phenylethynylsulfonyl)naphthalene (8c)<sup>11</sup>

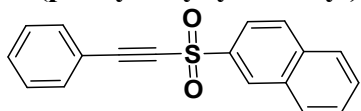

<sup>1</sup>H NMR (500 MHz, CDCl<sub>3</sub>) δ = 7.34-7.37 (m, 2H), 7.44-7.53 (m, 3H), 7.64-7.71 (m, 2H), 7.94-8.04 (m, 4H), 8.65 (d, J=0.5 Hz, 1H).

<sup>13</sup>C NMR (125 MHz, CDCl<sub>3</sub>) δ = 85.44, 93.76, 117.90, 122.16, 127.88, 128.07, 128.70, 129.29, 129.64, 129.71, 129.85, 131.58, 132.10, 132.79, 135.56, 138.54.

ESI-MS (C<sub>18</sub>H<sub>21</sub>O<sub>2</sub>S): 293 [M+H]<sup>+</sup>.

### 40. 1-ethyl-4-(phenylethynylsulfonyl)benzene (8d)

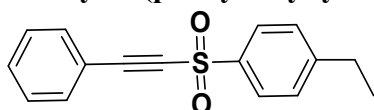

<sup>1</sup>H NMR (500 MHz, CDCl<sub>3</sub>) δ = 1.26-1.29 (t, J=8.0 Hz, 3H), 2.73-2.78 (q, J=8.0 Hz, 2H), 7.35-7.46 (m, 5H), 7.51-7.53 (m, 2H), 7.97-7.99 (m, 2H).

<sup>13</sup>C NMR (125 MHz, CDCl<sub>3</sub>) δ = 15.12, 29.02, 85.56, 92.98, 118.03, 127.63, 128.68, 128.89, 131.48, 132.76, 139.02, 151.49.

HRMS (ESI): m/z [M+H]<sup>+</sup> calcd for C<sub>16</sub>H<sub>14</sub>O<sub>2</sub>S : 271.0748, found: 271.0776.

### 41. 2-(4-ethoxyphenyl)-3-tosylbenzofuran (10)<sup>12</sup>

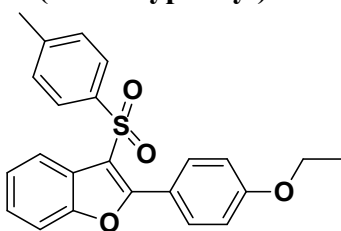

<sup>1</sup>H NMR (500 MHz, CDCl<sub>3</sub>) δ = 1.45-1.47 (t, J=7.0 Hz, 3H), 2.32 (s, 3H), 4.10-4.14 (q, J=7.0 Hz, 2H), 6.98-7.00 (m, 2H), 7.15 (d, J=8.0 Hz, 2H), 7.35-7.37 (m, 2H), 7.47-7.49 (m, 1H), 7.68 (d, J=8.5 Hz, 2H), 7.91-7.94 (m, 2H), 7.13-8.15 (m, 1H).

<sup>13</sup>C NMR (125 MHz, CDCl<sub>3</sub>) δ = 14.78, 21.55, 63.69, 111.27, 114.19, 117.27, 120.36, 121.53, 124.46, 125.59, 125.85, 126.65, 129.60, 131.79, 139.71, 144.04, 152.98, 159.07.

ESI-MS (C<sub>23</sub>H<sub>20</sub>O<sub>4</sub>S): 393 [M+H]<sup>+</sup>.

## References

1. (a) S. Gupta, P. Sureshababu, A. K. Singh, S. Sabiah and J. Kandasamy, *Tetrahedron Letters*, **2017**, *58*, 909–913; (b) L. Degennaro, A. Tota, S. De Angelis, M. Andresini, C. Cardellicchio, M. A. Capozzi, G. Romanazzi, R. Luisi, *Eur. J. Org. Chem.*, **2017**, 6486-6490
2. G.-Y. Zhang, S.-S.Lv, A. Shoberuand J.-P. Zou, *J. Org. Chem.* 2017, **82**, 9801–9807.
3. Q. Chen, Y. Huang, X. Wang, J. Wua and G. Yu, *Org. Biomol. Chem.*, 2018, **16**, 1713–1719.
4. P. Mampuy, Y. Zhu, S. Sergeev, E. Ruijter, R. V. A. Orru, S. V. Doorslaer and B. U. W. Maes, *Org. Lett.* 2016, **18**, 2808–2811.



5. Z. Peng, X. Zheng, Y. Zhang, D. An and W. Dong, *Green Chem.*, 2018, **20**, 1760–1764.
6. Y. Zhang, P. Ji, W. Hu, Y. WESI, H. Huang and W. Wang, *Chem. Eur. J.* 2019, **25**, 8225 – 8228.
7. R. J. Reddy, M. Waheeda and G. R. Krishna, *Org. Biomol. Chem.*, 2020, **18**, 3243–3248.
8. K. Kanemoto, Y. Sugimura, S. Shimizu, S. Yoshida and T. Hosoya, *Chem. Commun.*, 2017, **53**, 10640-10643.
9. D. Luo, L. Min, W. Zheng, L. Shan, X. Wang, Y. Hu, *Chin. Chem. Lett.*, 2020, **31**, 1877–1880.
10. (a) Y. Sun, A. Abdukader, D. Lu, H. Zhang and C. Liu, *Green Chem.*, 2017, **19**, 1255–1258; (b) C. Tong, B. Gan, Y. Yan, Y.-Y. Xie, *Synth. Commun.*, 2017, **47**, 1927-1933.
11. (a) W. Wei, J. Wen, D. Yang, H. Jing, J. You and H. Wang, *RSC Adv.*, 2015, **5**, 4416–4419; (b) L. Wanga, W. Wei, D. Yang, H. Cui, H. Yue and H. Wang, *Tetrahedron Lett.*, 2017, **58**, 4799–4802.
12. R. J. Reddy, J. J. Kumar, A. H. Kumari and G. R. Krishna, *Adv. Synth. Catal.* 2020, **362**, 1317-1322.

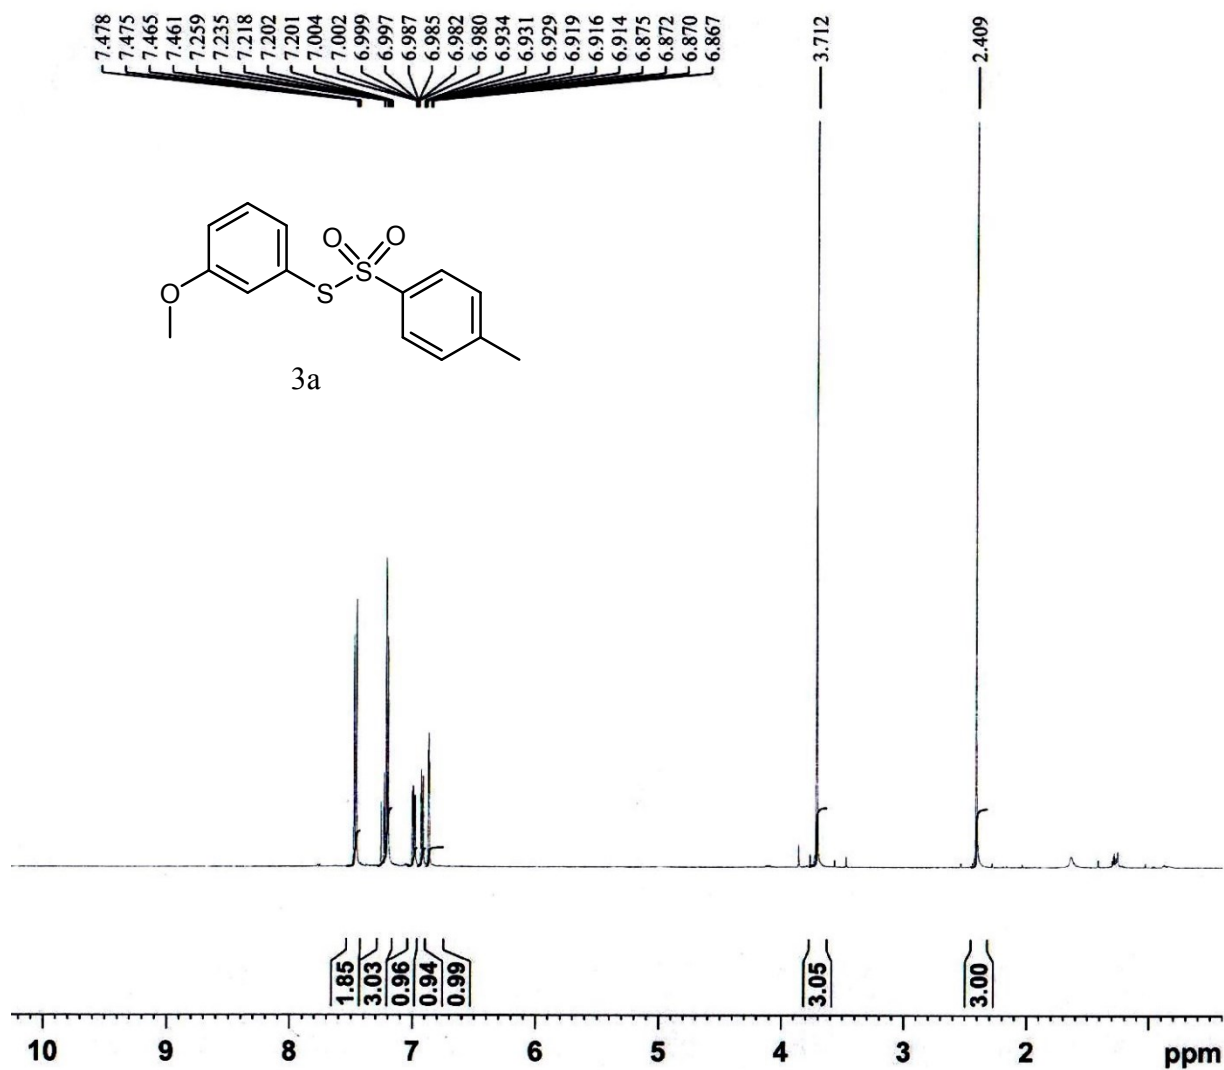

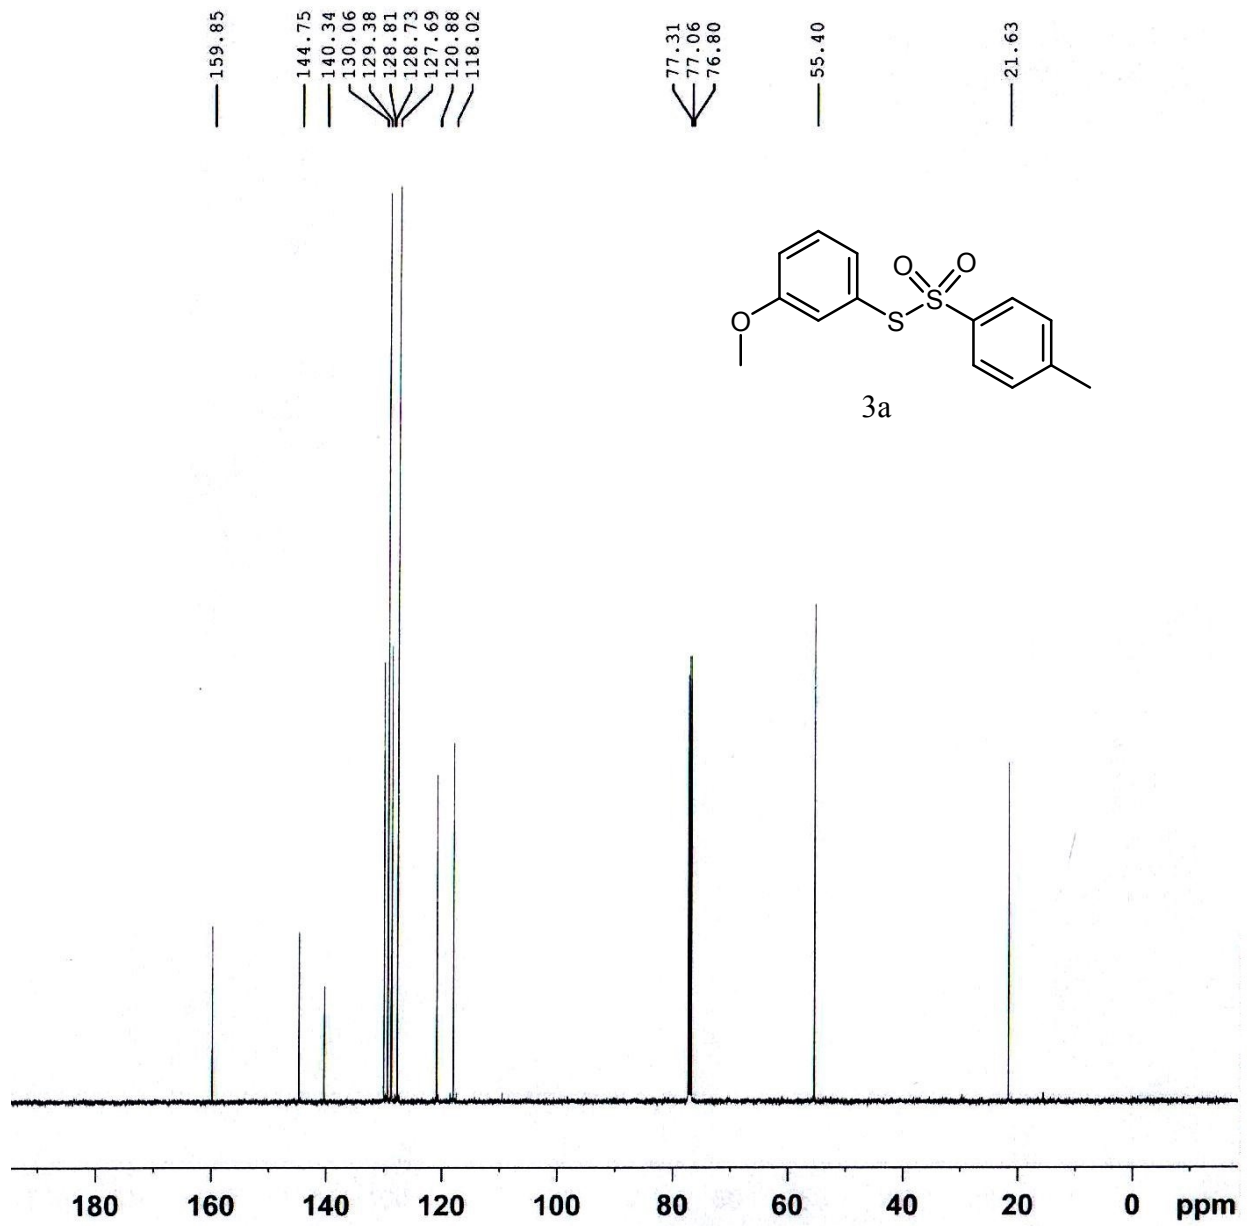

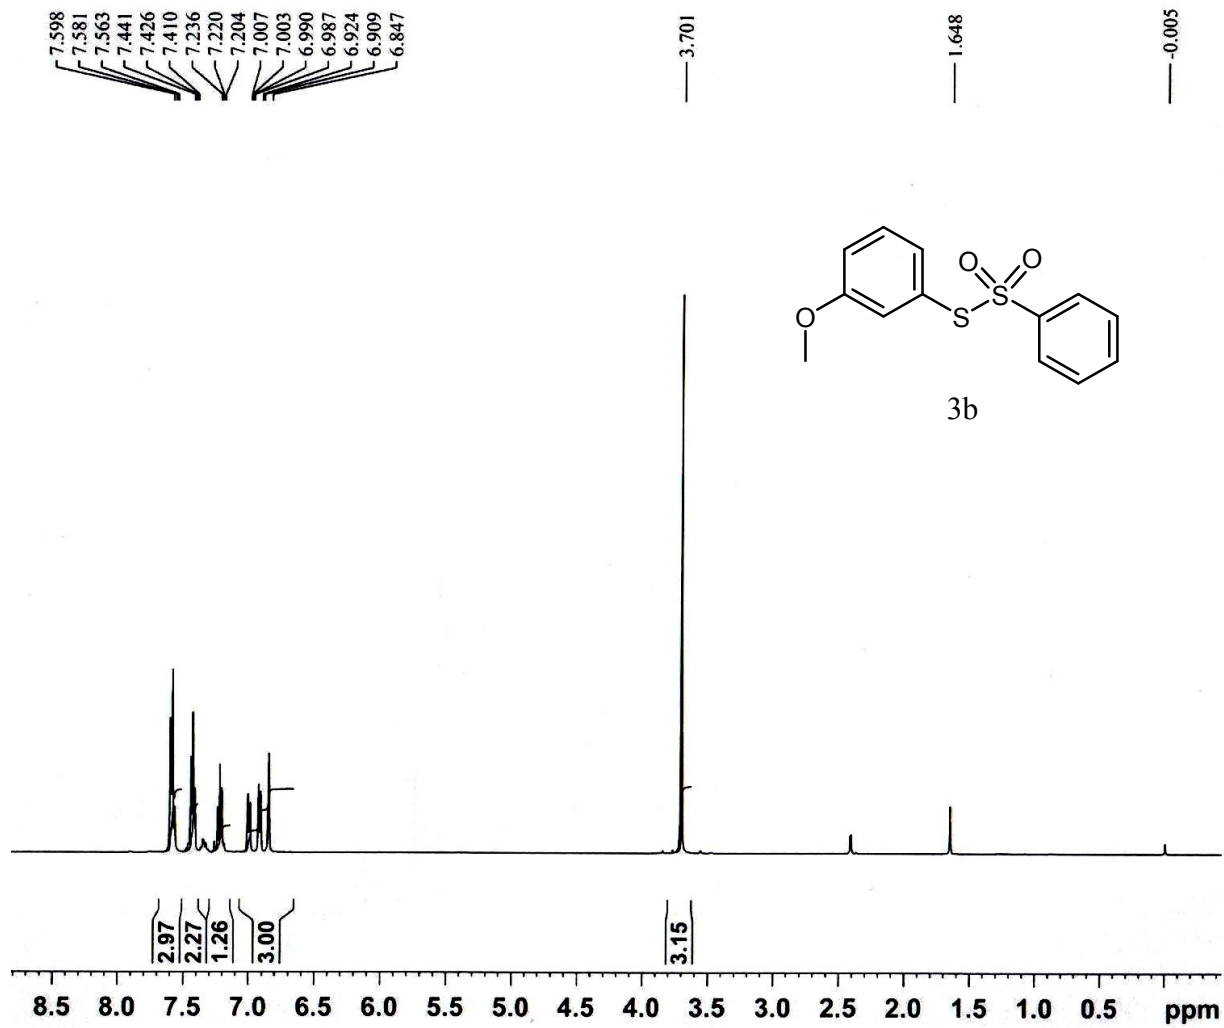

159.87  
142.93  
136.59  
133.68  
130.14  
128.84  
128.76  
127.65  
120.84  
118.14  
77.33  
77.08  
76.83  
55.44

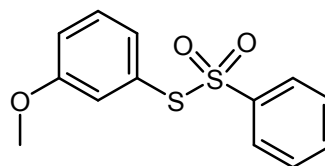

3b

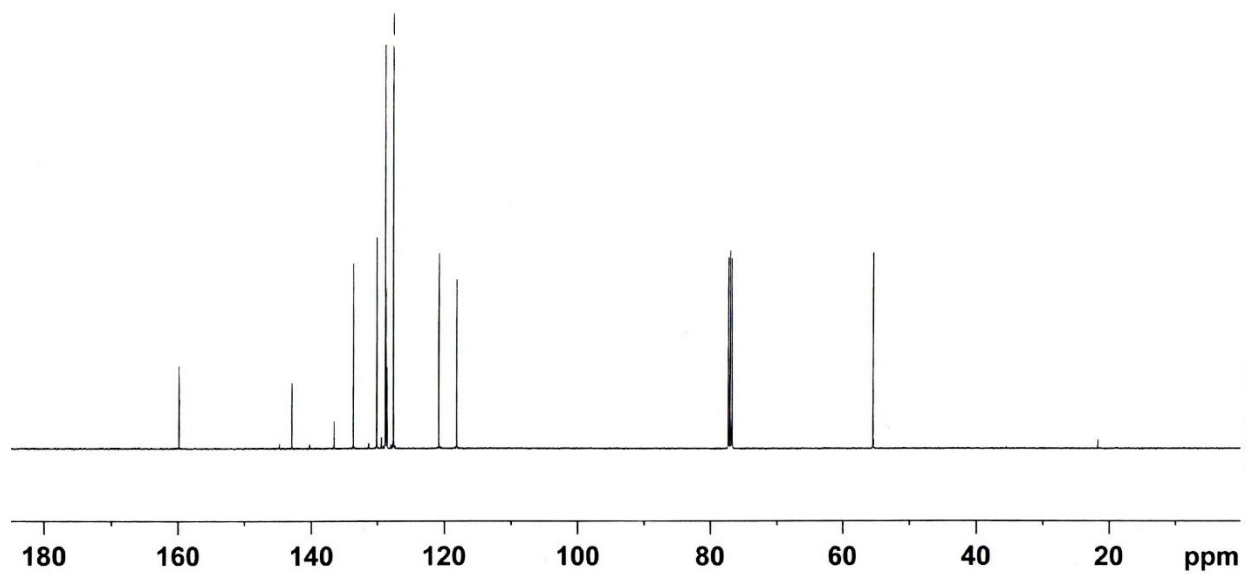

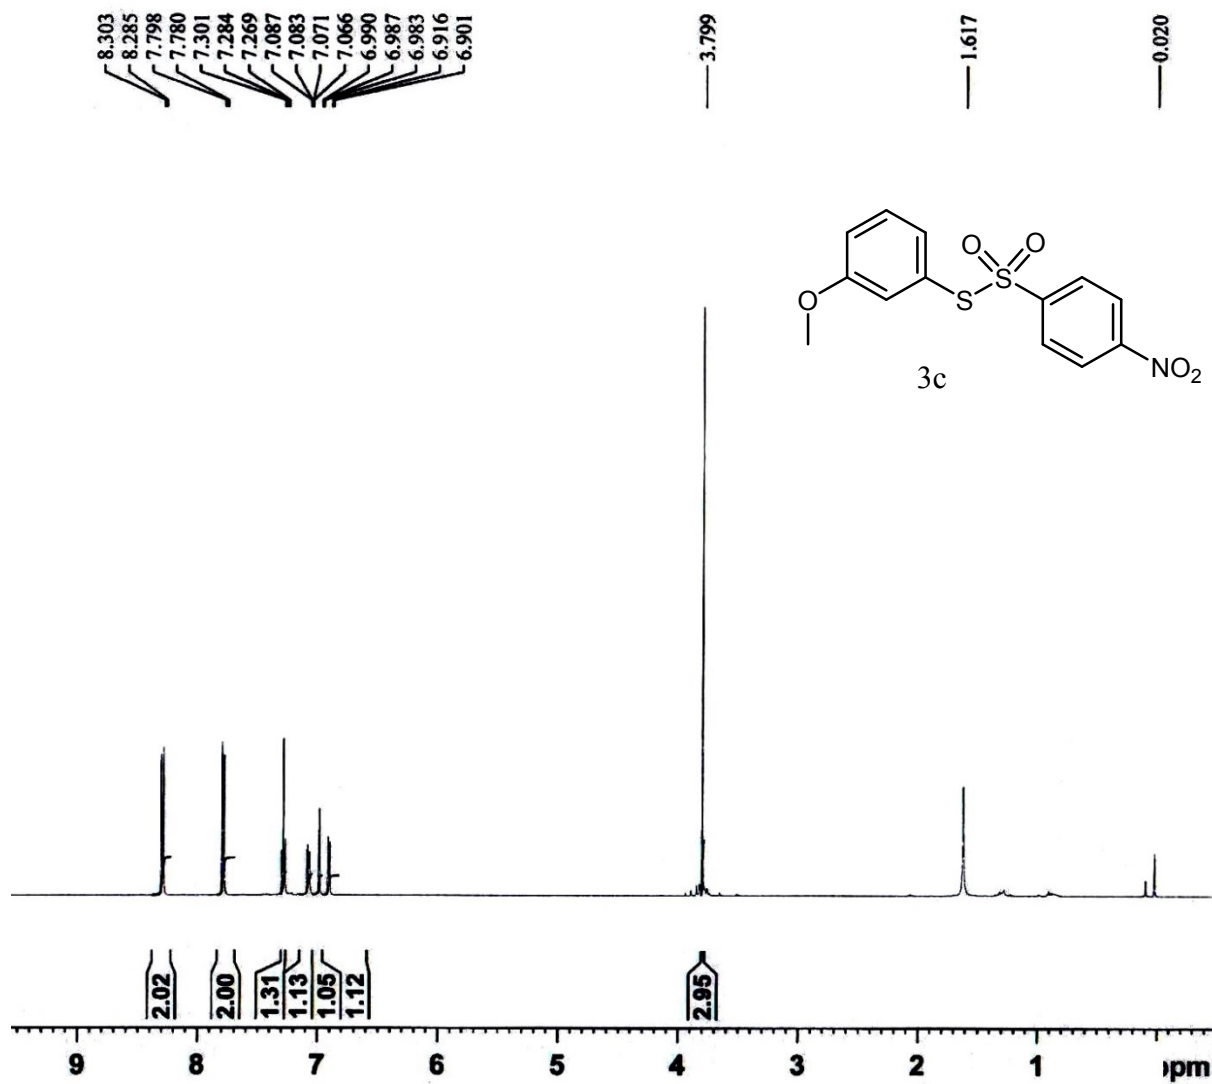

160.20  
150.41  
147.93  
130.48  
128.81  
128.41  
127.66  
124.10  
121.23  
118.29

77.28  
77.02  
76.77

55.56

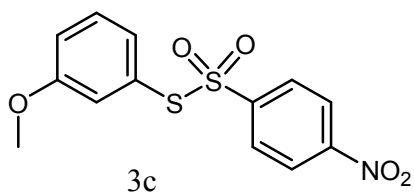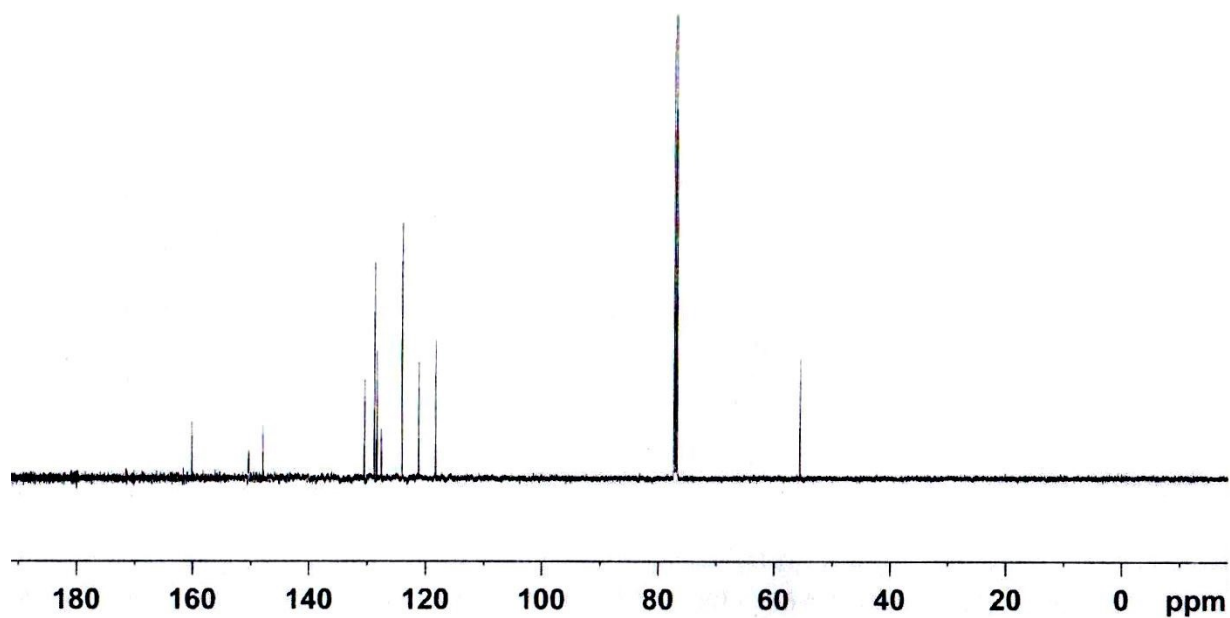

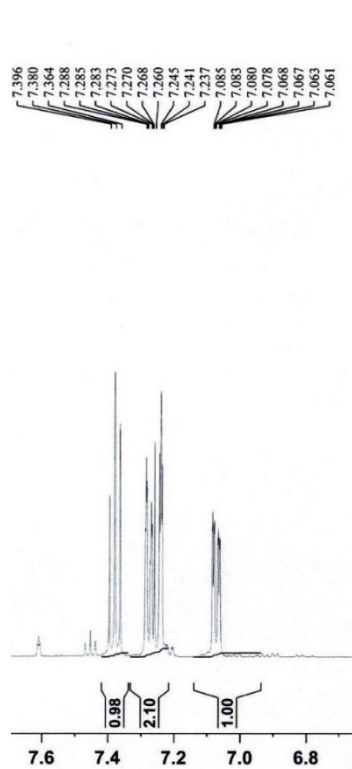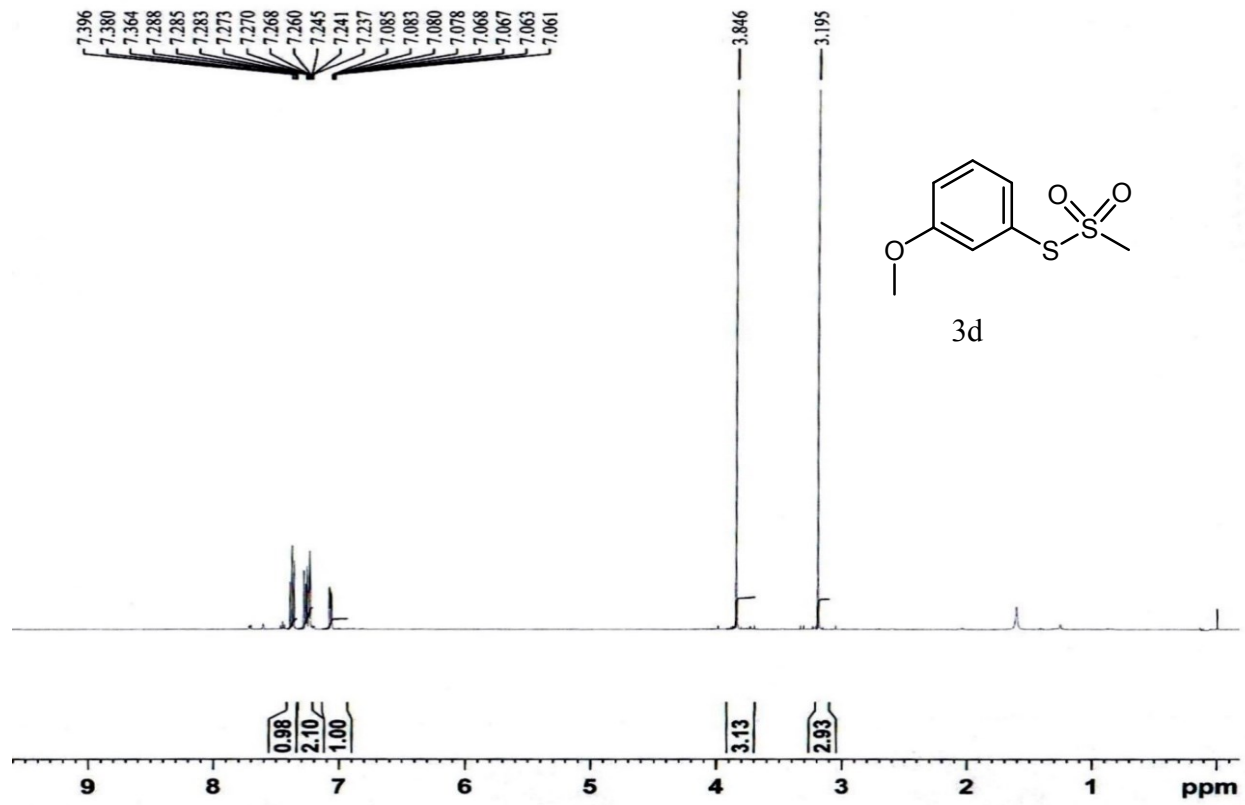



— 160.26

130.56  
128.74  
128.15  
121.10  
117.81

77.29  
77.03  
76.78

— 55.59

— 47.49

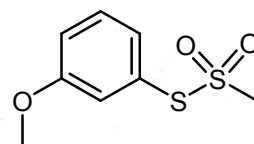

3d

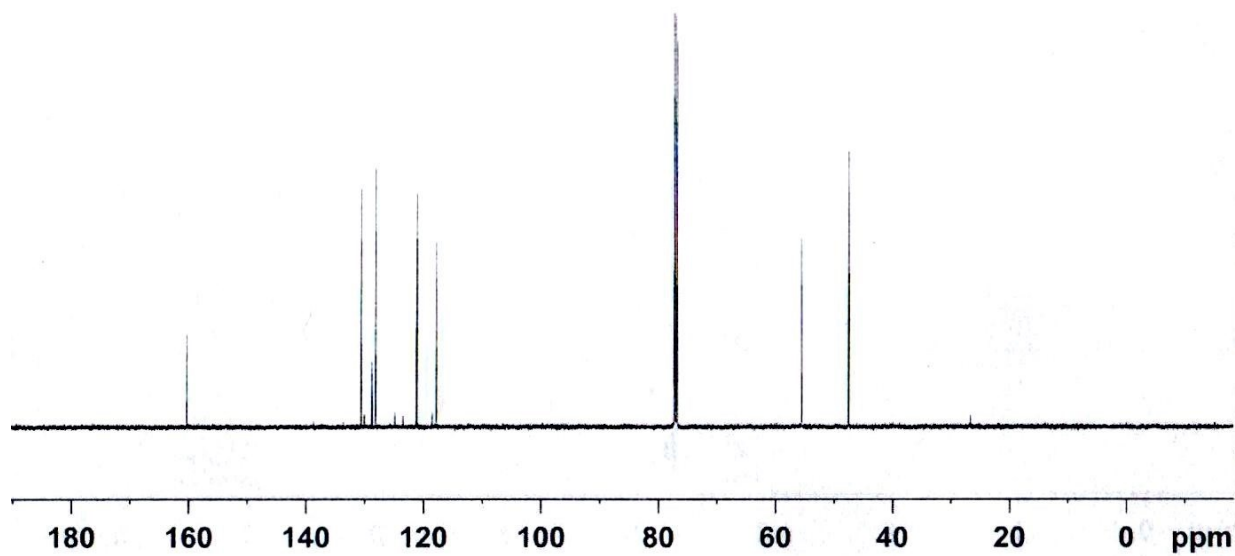

7.979  
7.977  
7.970  
7.902  
7.884  
7.883  
7.801  
7.800  
7.784  
7.705  
7.701  
7.687  
7.683  
7.671  
7.668  
7.657  
7.652  
7.641  
7.638  
7.598  
7.596  
7.584  
7.582  
7.568  
7.565  
7.178  
7.162  
7.161  
7.146  
6.984  
6.979  
6.977  
6.967  
6.966  
6.962  
6.960  
6.940  
6.892  
6.897  
6.895  
6.885  
6.883  
6.882  
6.880  
6.879  
6.787  
6.784

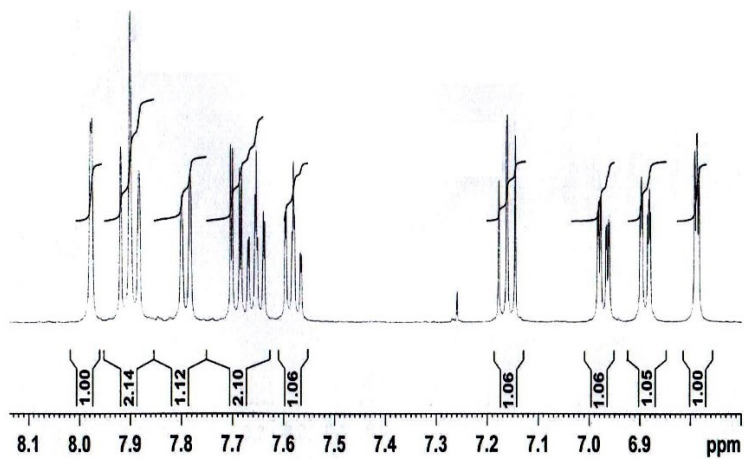

7.979  
7.976  
7.920  
7.902  
7.884  
7.883  
7.801  
7.800  
7.784  
7.783  
7.705  
7.701  
7.687  
7.683  
7.671  
7.668  
7.657  
7.655  
7.652  
7.641  
7.638  
7.598  
7.596  
7.584  
7.582  
7.579  
7.568  
7.565  
7.260  
7.178  
7.162  
7.161  
7.146  
6.984  
6.982  
6.979  
6.977  
6.967  
6.966  
6.962  
6.960  
6.900  
6.898  
6.897  
6.895  
6.885  
6.883  
6.882  
6.880  
6.789  
6.787  
6.784  
3.532

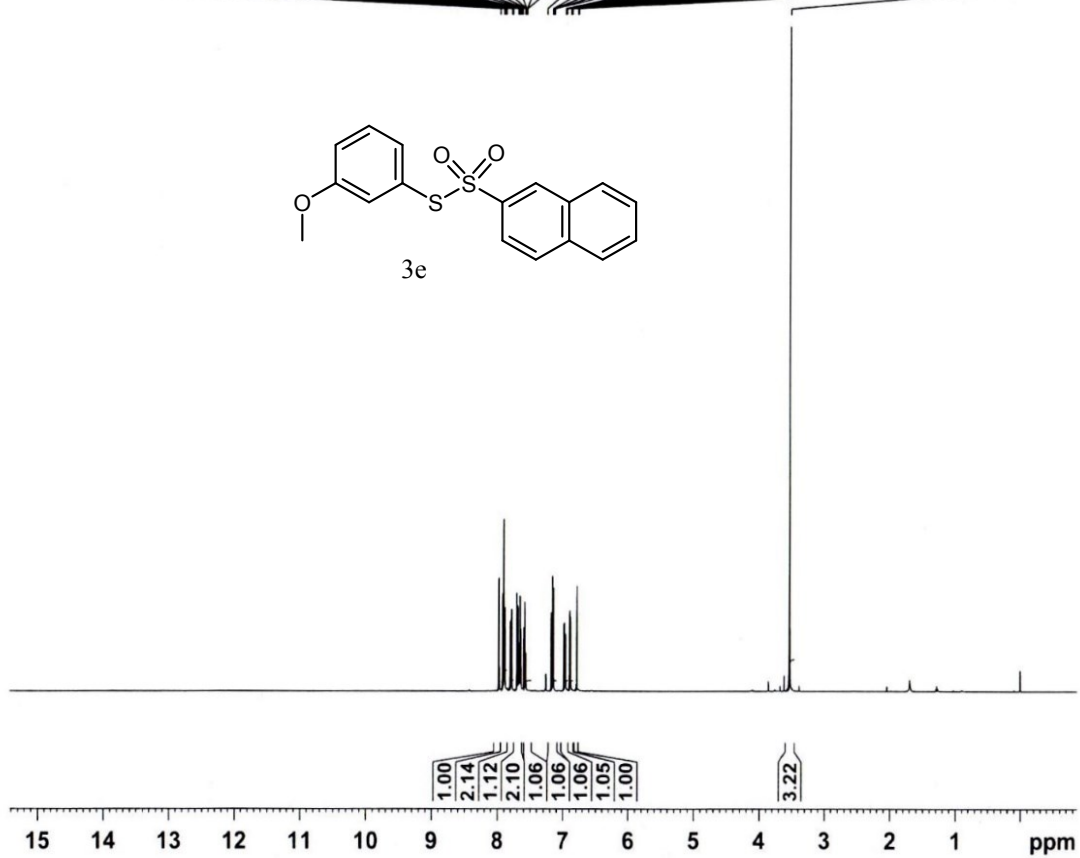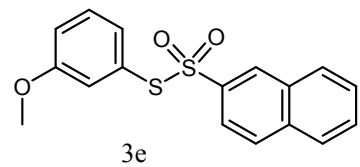

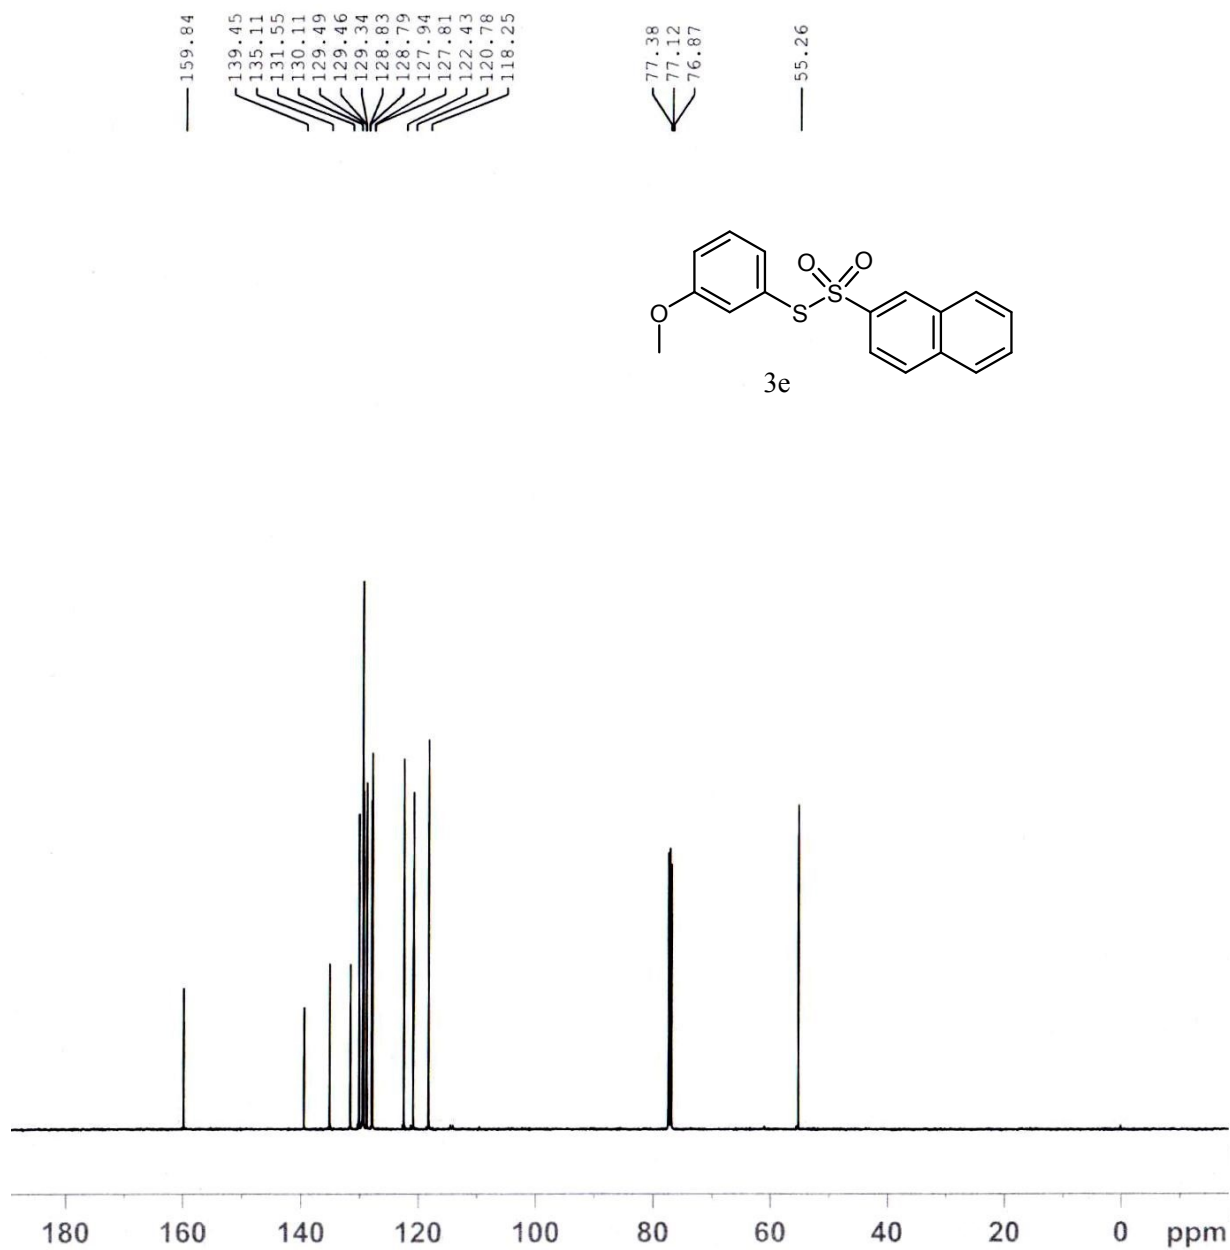

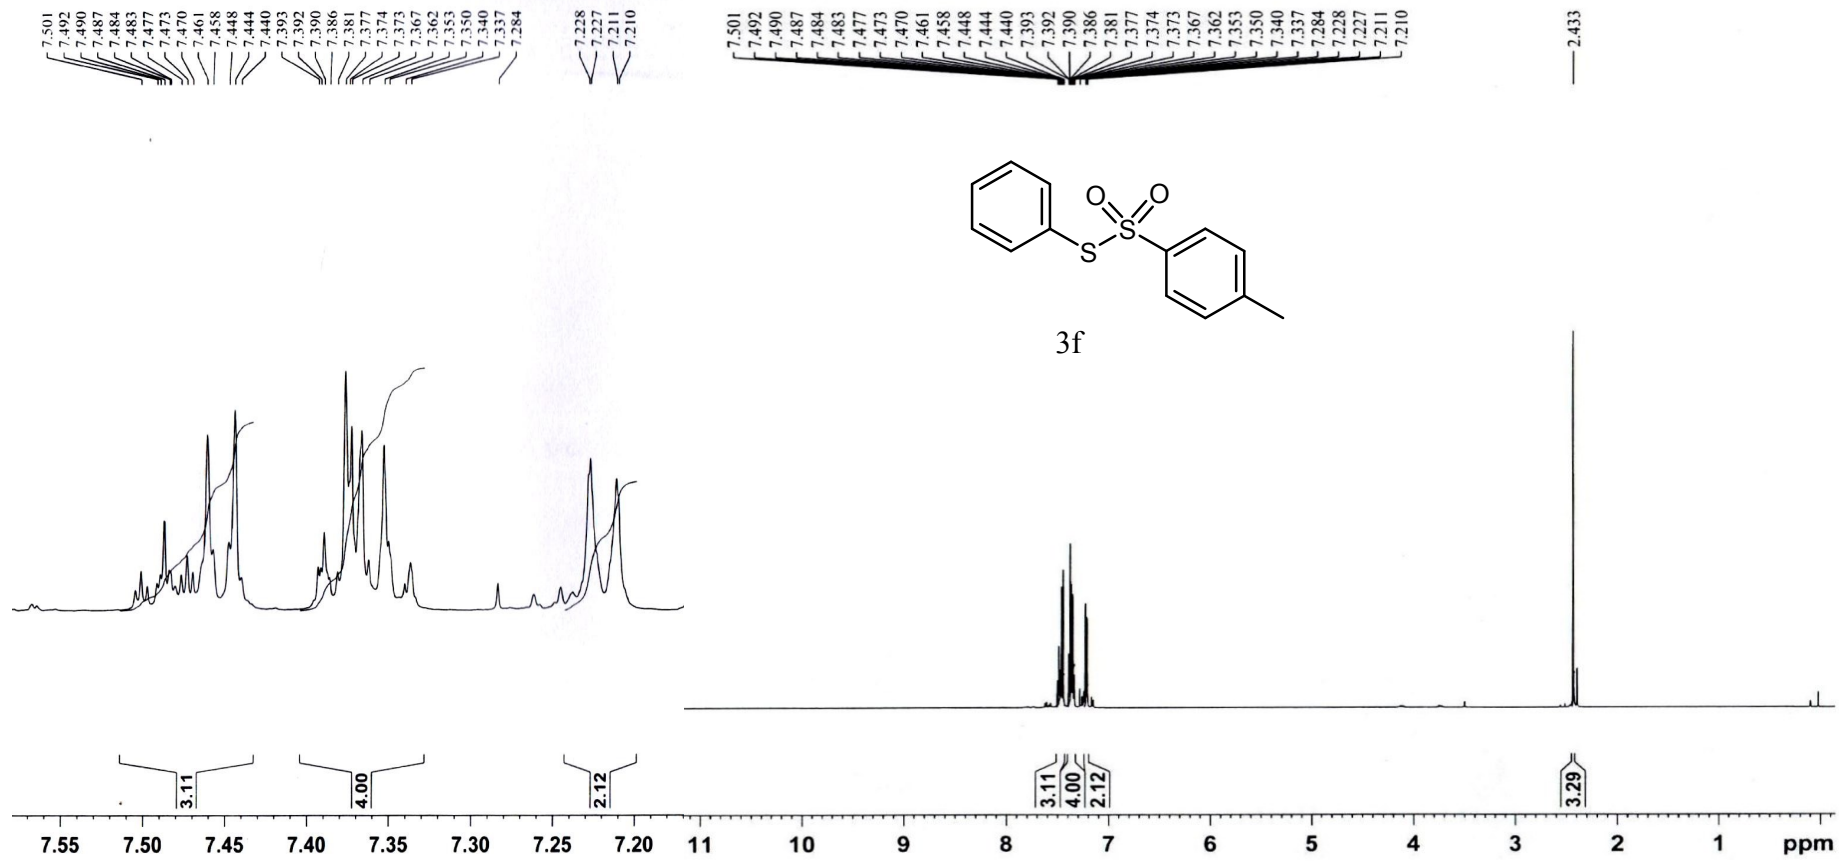

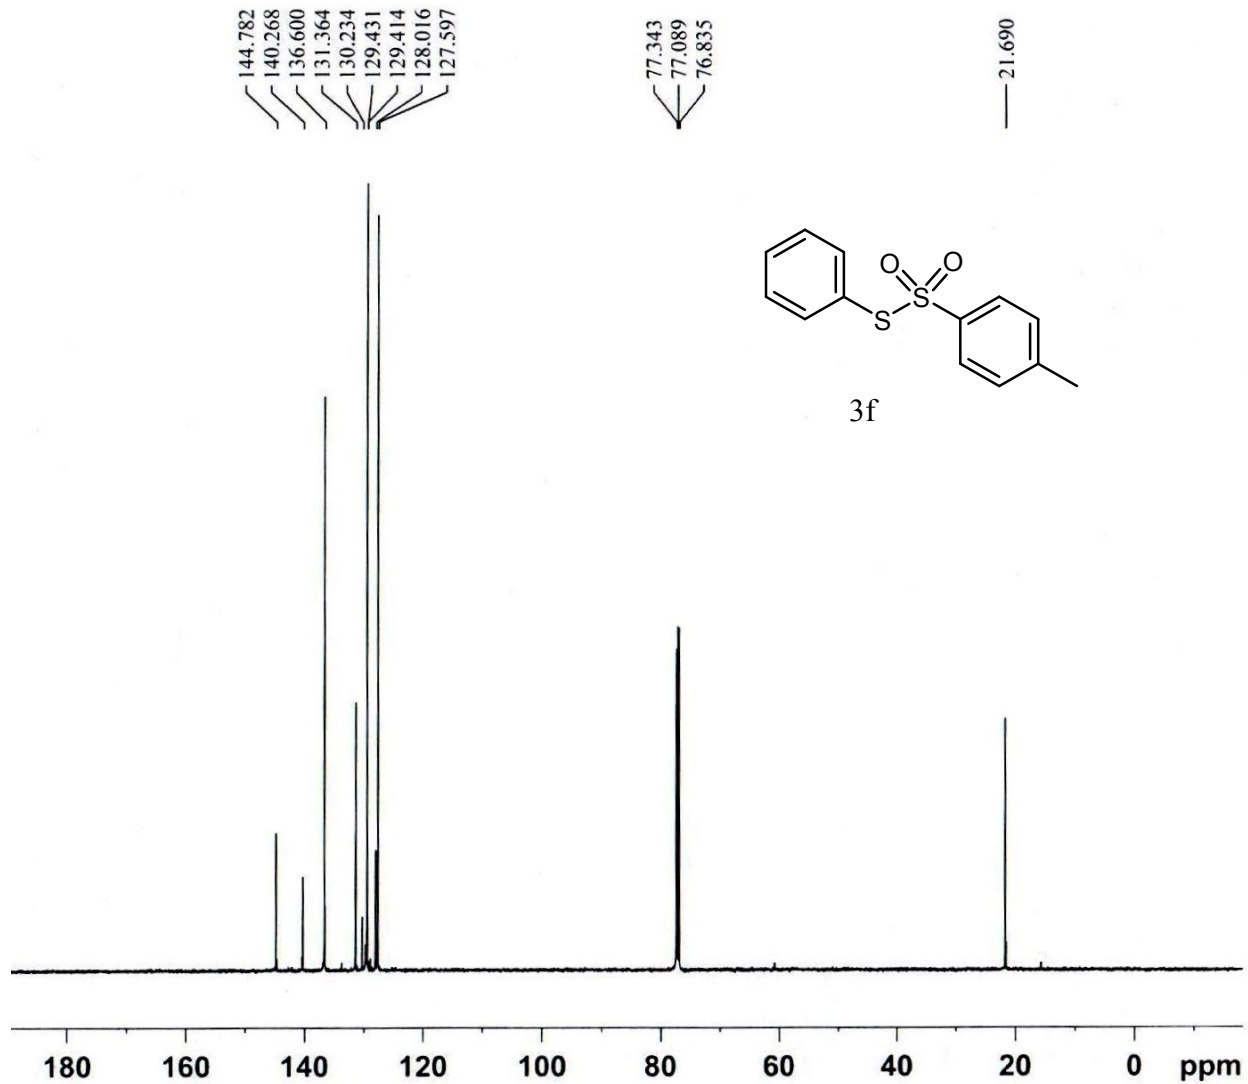

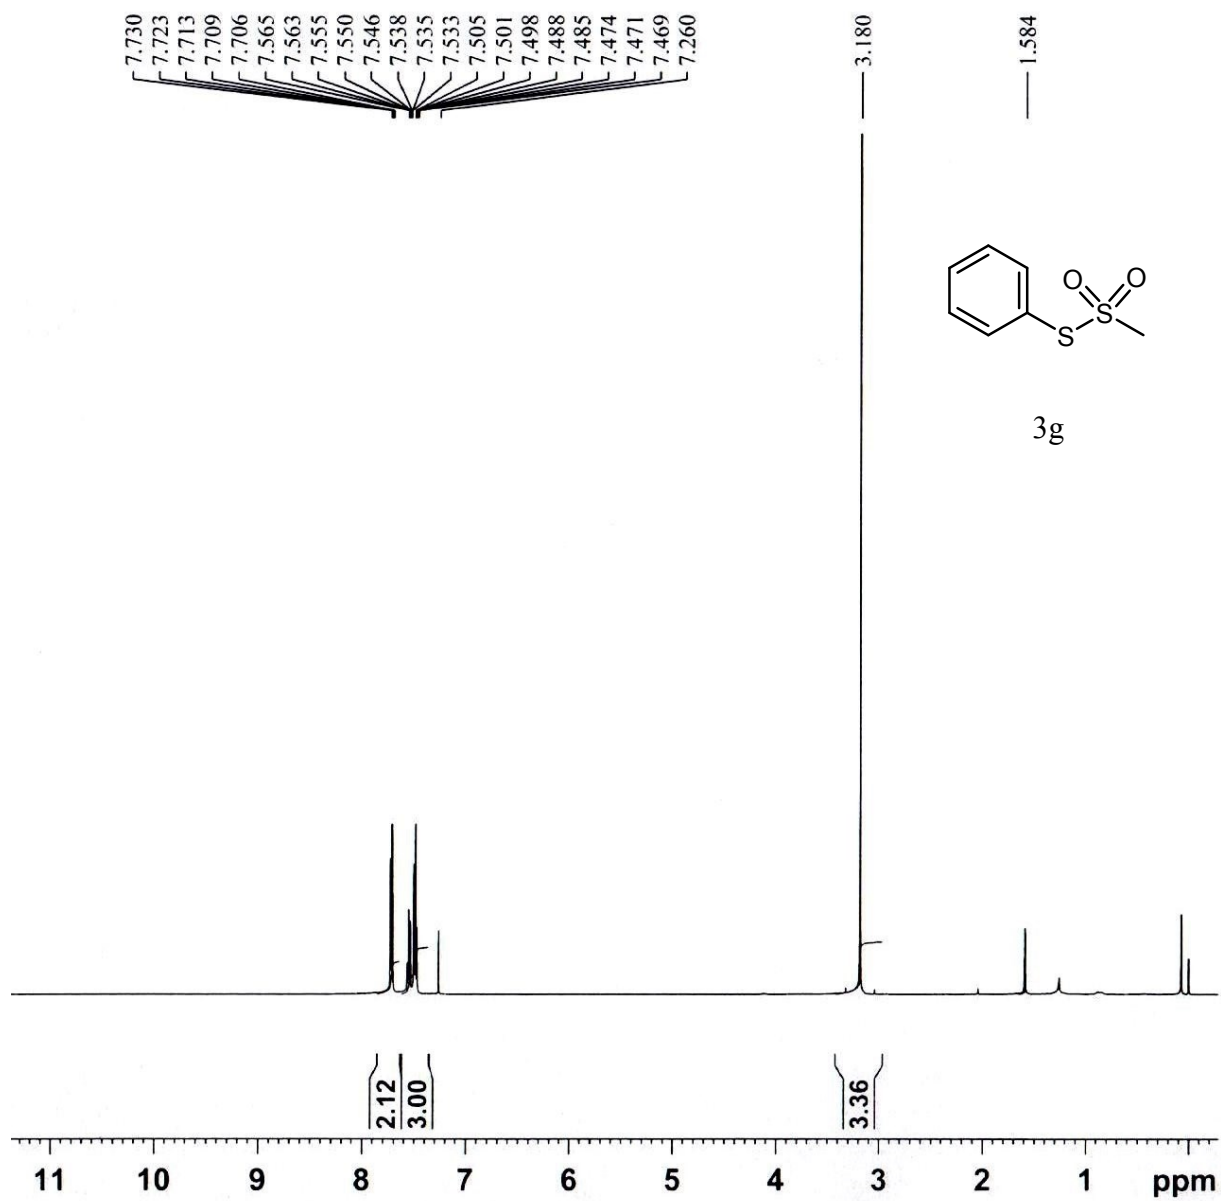

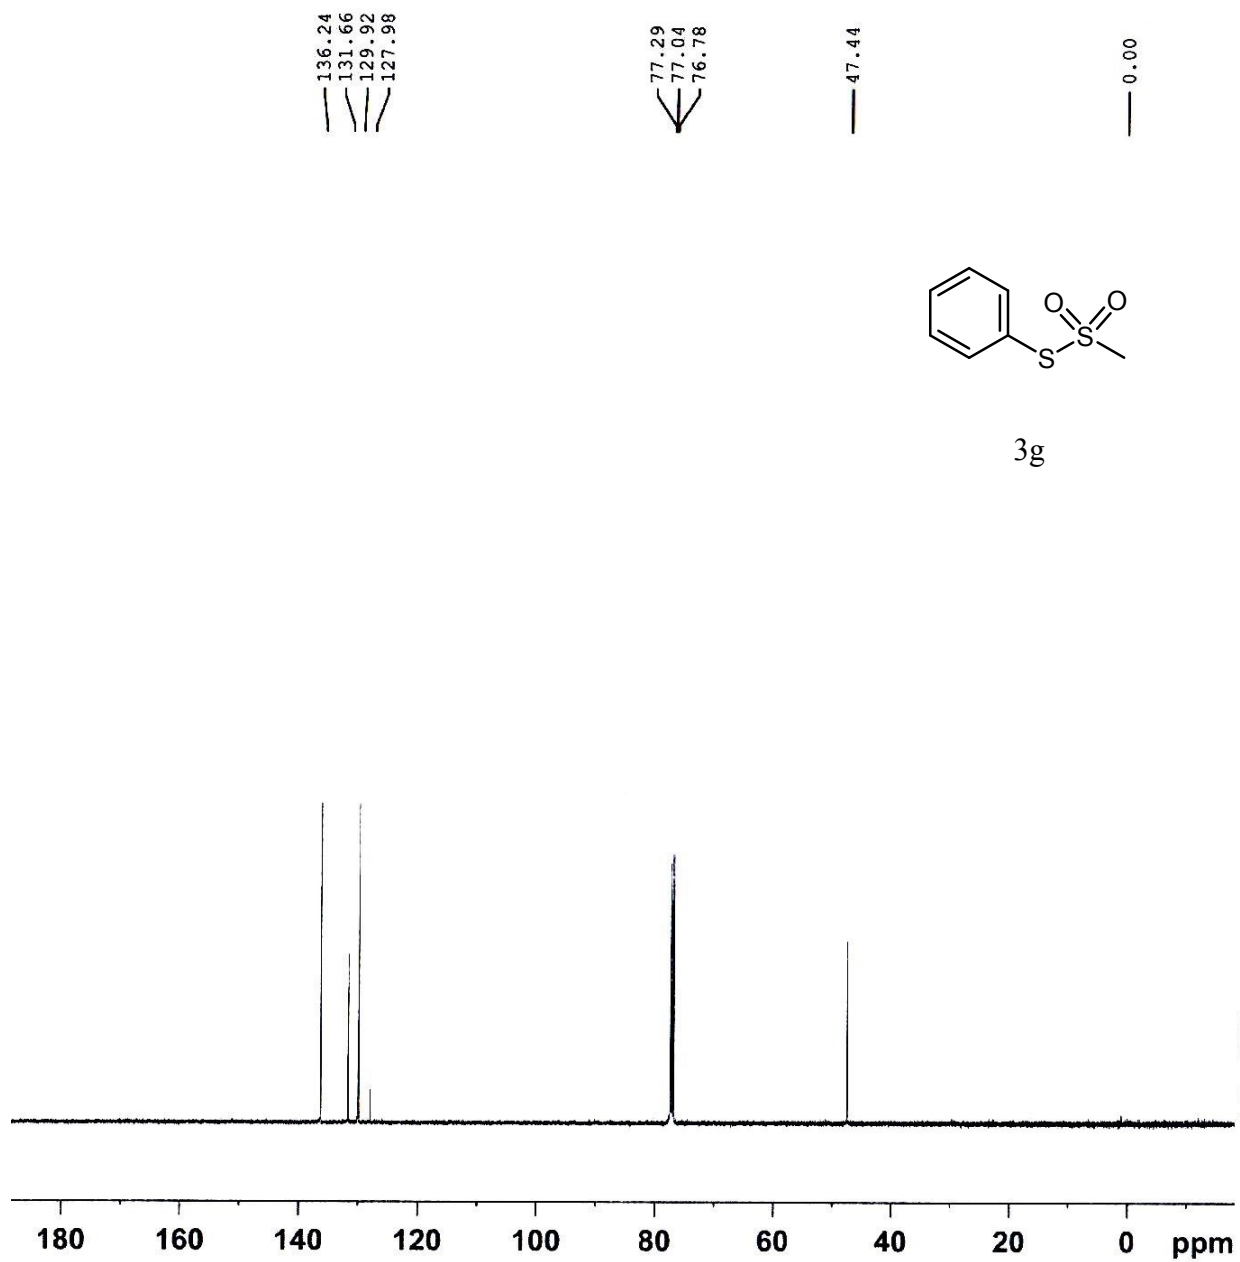

7.958  
7.955  
7.916  
7.907  
7.898  
7.891  
7.786  
7.785  
7.769  
7.768  
7.687  
7.683  
7.677  
7.675  
7.669  
7.665  
7.664  
7.661  
7.658  
7.647  
7.645  
7.599  
7.597  
7.586  
7.583  
7.581  
7.569  
7.567  
7.468  
7.466  
7.457  
7.456  
7.454  
7.452  
7.442  
7.439  
7.436  
7.340  
7.339  
7.338  
7.334  
7.328  
7.324  
7.321  
7.294  
7.291  
7.287  
7.276  
7.273  
7.264  
7.260

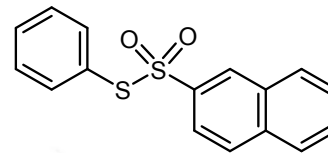

3h

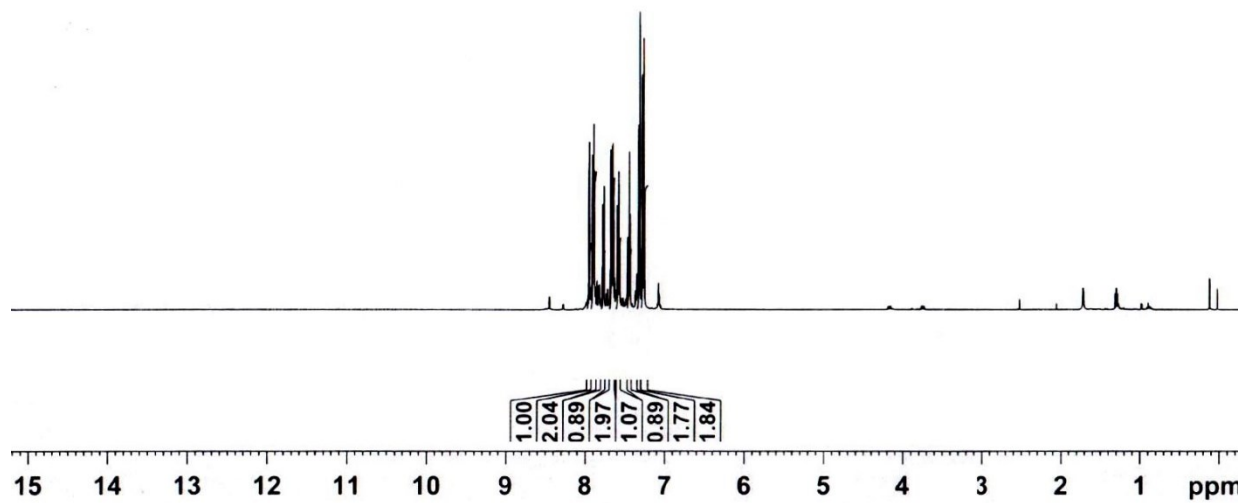



139.56  
136.65  
135.12  
131.56  
131.49  
129.56  
129.48  
129.46  
129.39  
129.37  
129.32  
129.05  
128.03  
127.98  
127.80  
122.36

77.41  
77.15  
76.90

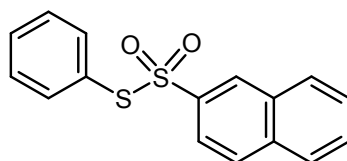

3h

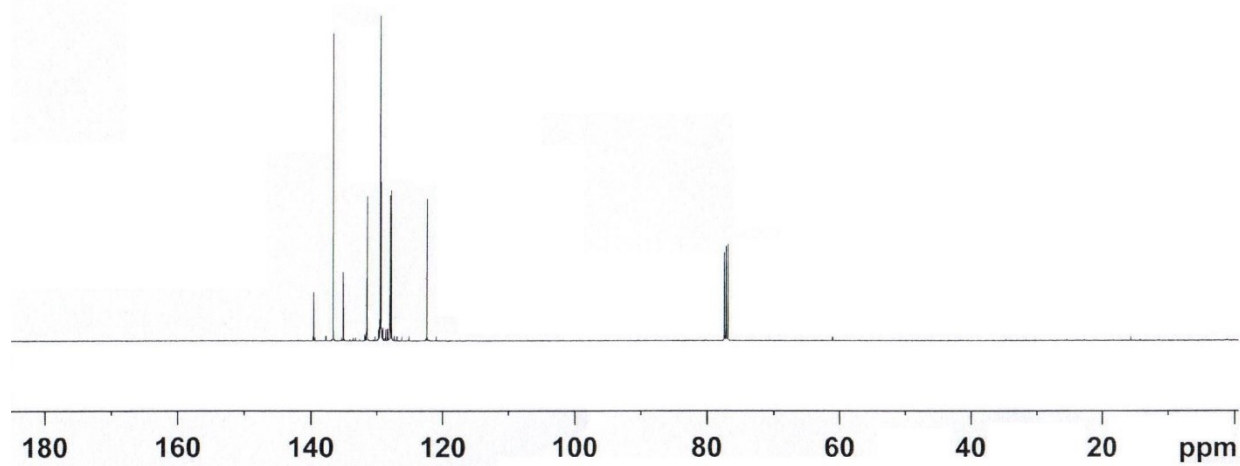

7.472  
7.455  
7.260  
7.231  
7.215  
7.211  
7.193  
6.785  
6.768

3.509

2.418

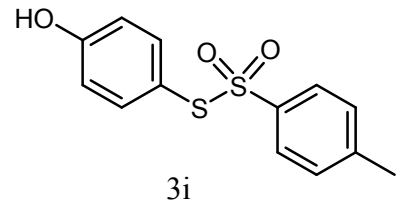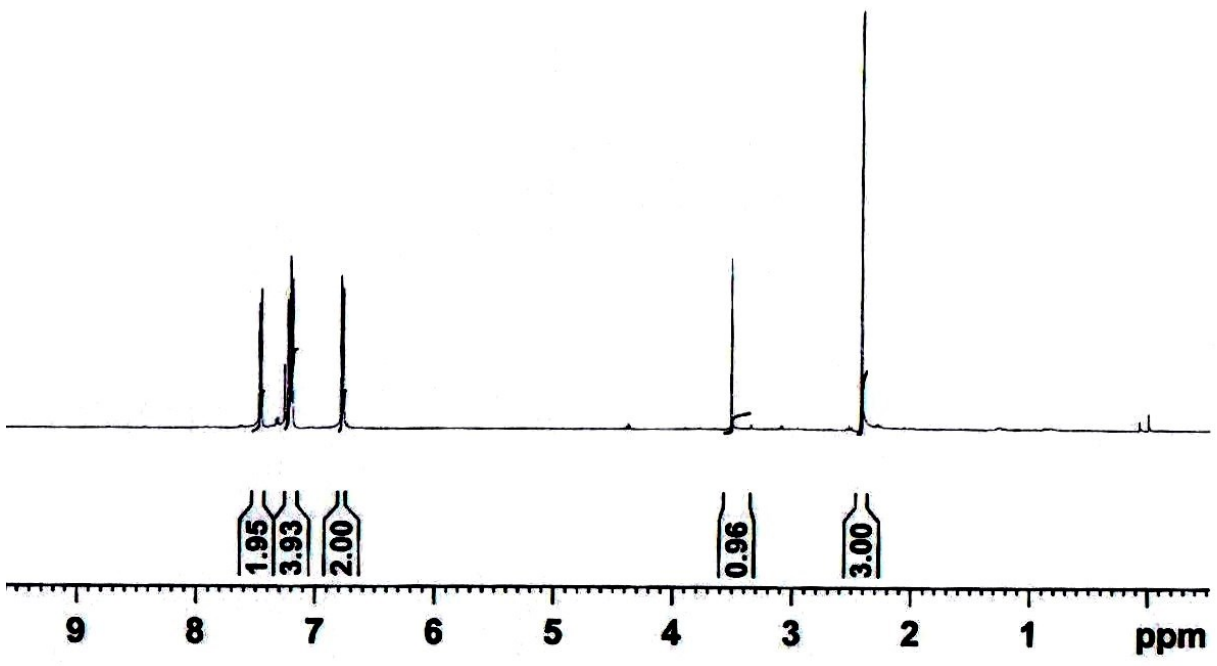

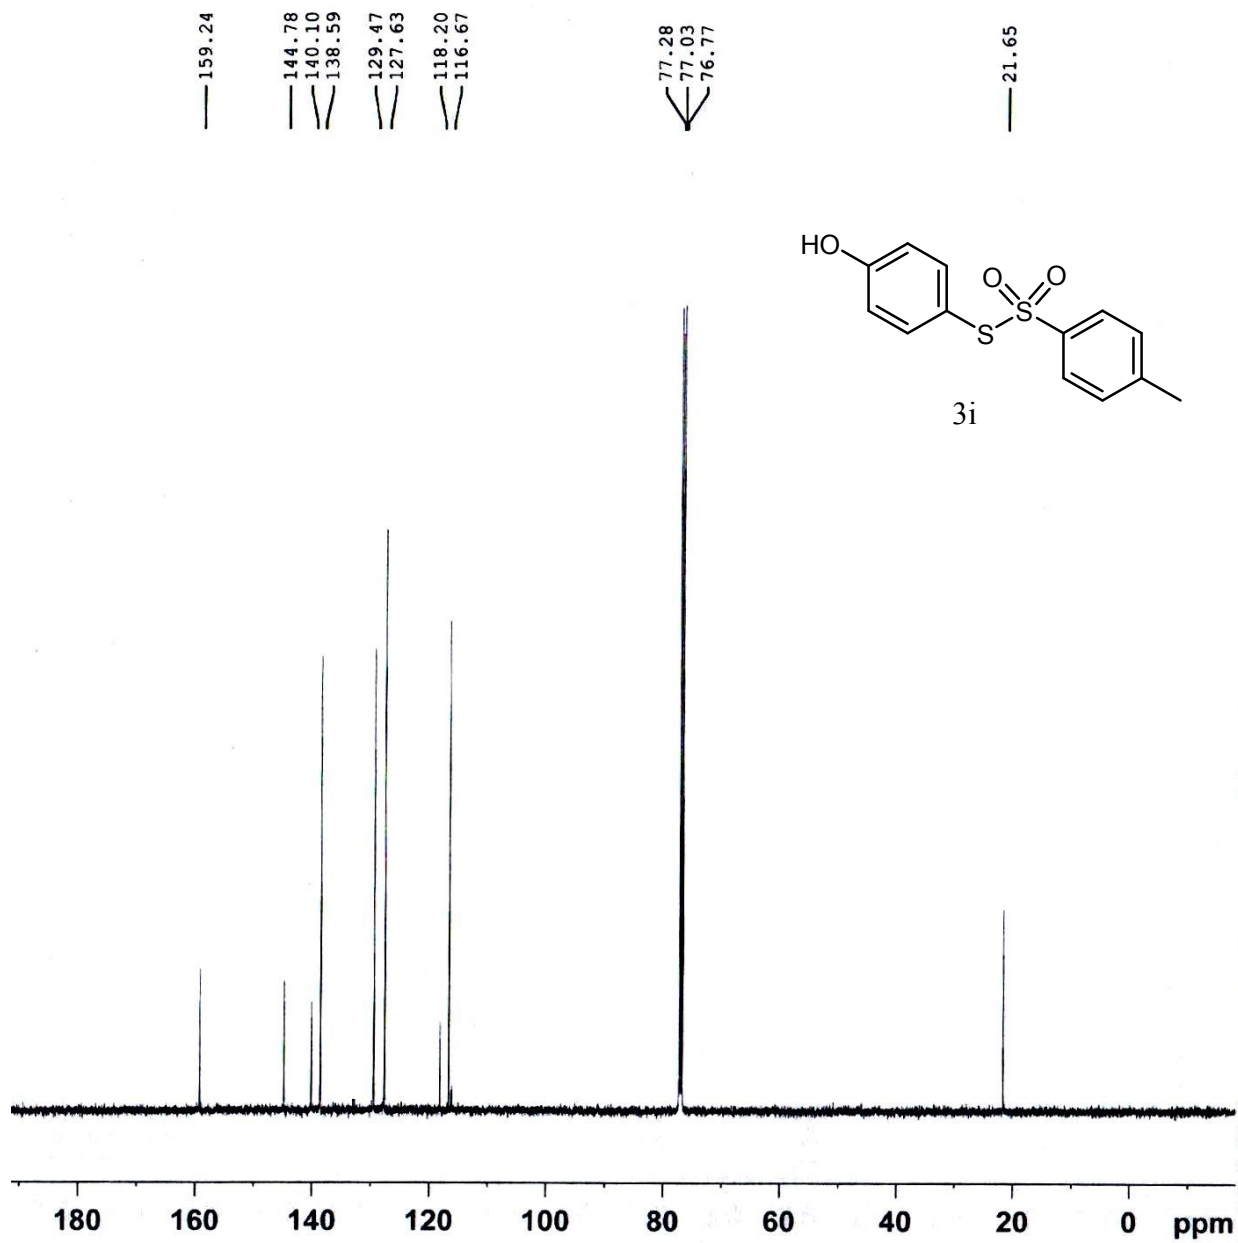

7.595  
7.595  
7.580  
7.578  
7.568  
7.453  
7.438  
7.422  
7.260  
7.202  
7.197  
7.184  
7.180  
6.787  
6.782  
6.765  
6.759

3.508

0.004

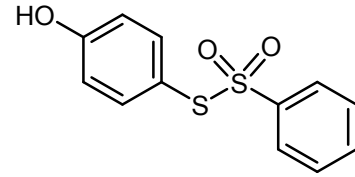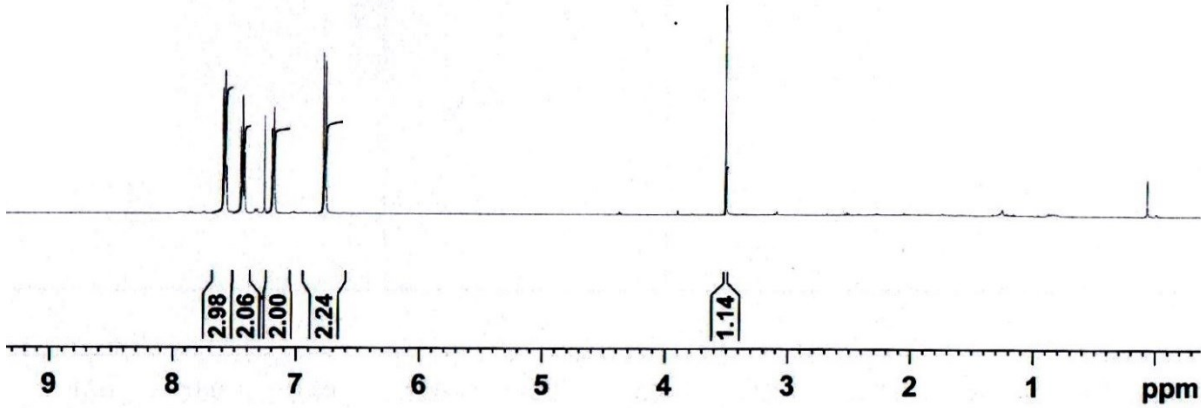

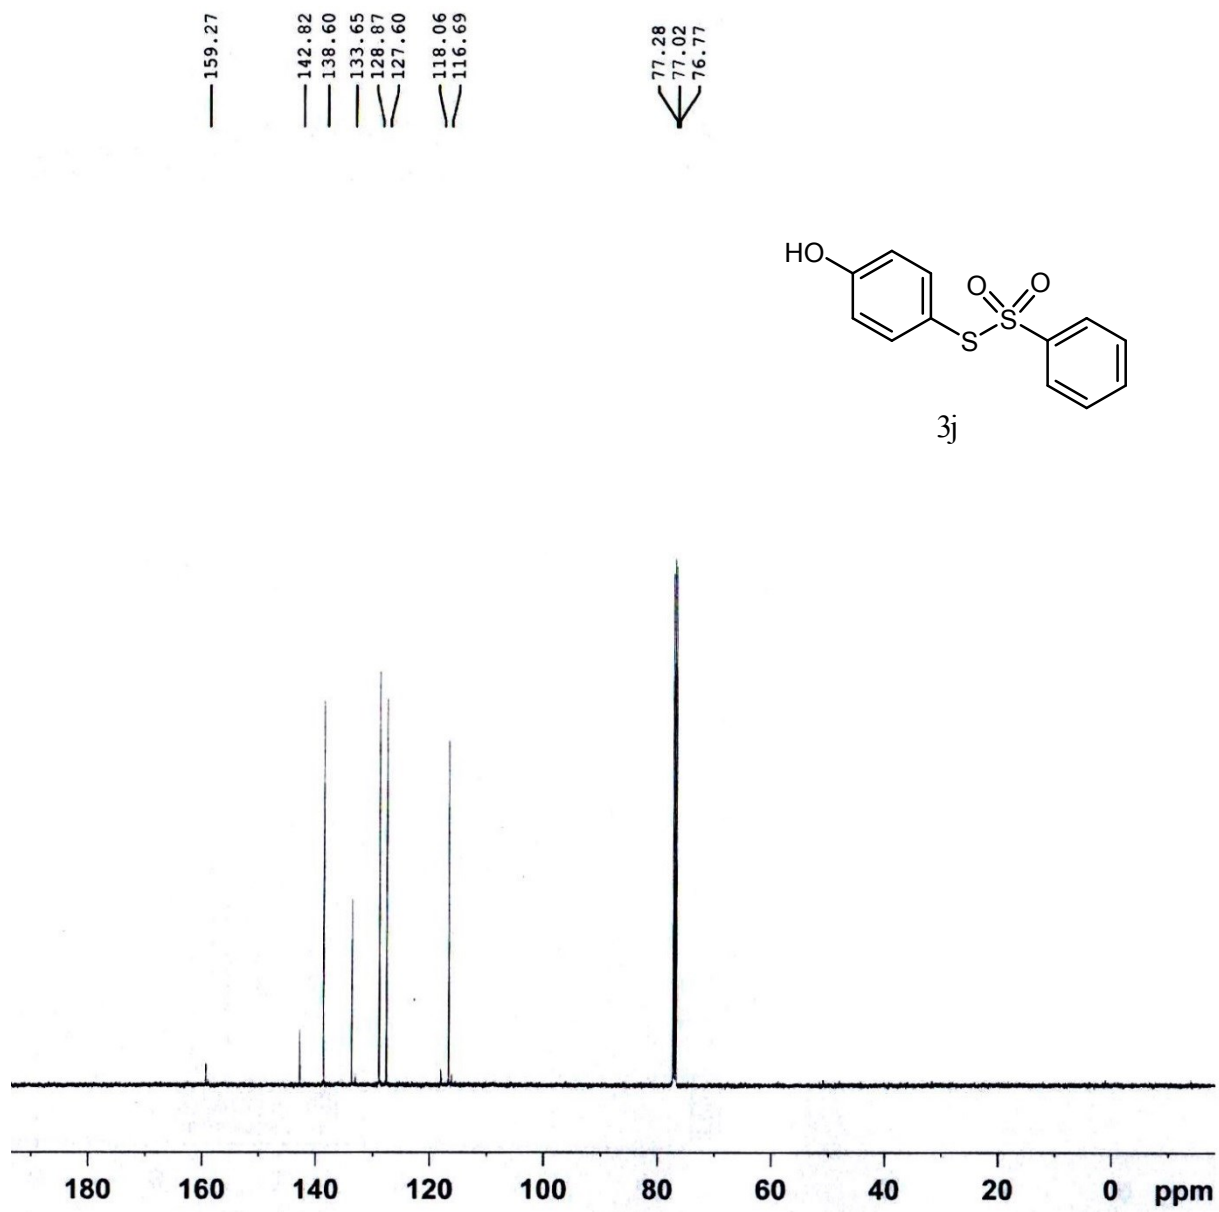

7.577  
7.575  
7.562  
7.560  
7.554  
7.545  
7.544  
7.539  
7.473  
7.469  
7.464  
7.458  
7.455  
7.451  
7.446  
7.442  
7.438  
7.417  
7.402  
7.400  
7.385  
7.344  
7.337  
7.332  
7.327  
7.314  
7.301  
7.297

7.577  
7.575  
7.562  
7.560  
7.554  
7.545  
7.544  
7.539  
7.473  
7.469  
7.464  
7.458  
7.455  
7.451  
7.446  
7.442  
7.438  
7.417  
7.402  
7.400  
7.385  
7.344  
7.337  
7.332  
7.327  
7.314  
7.301  
7.297

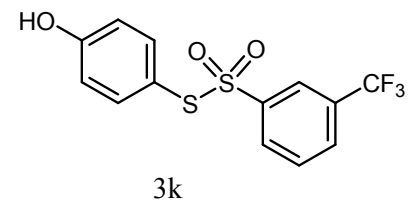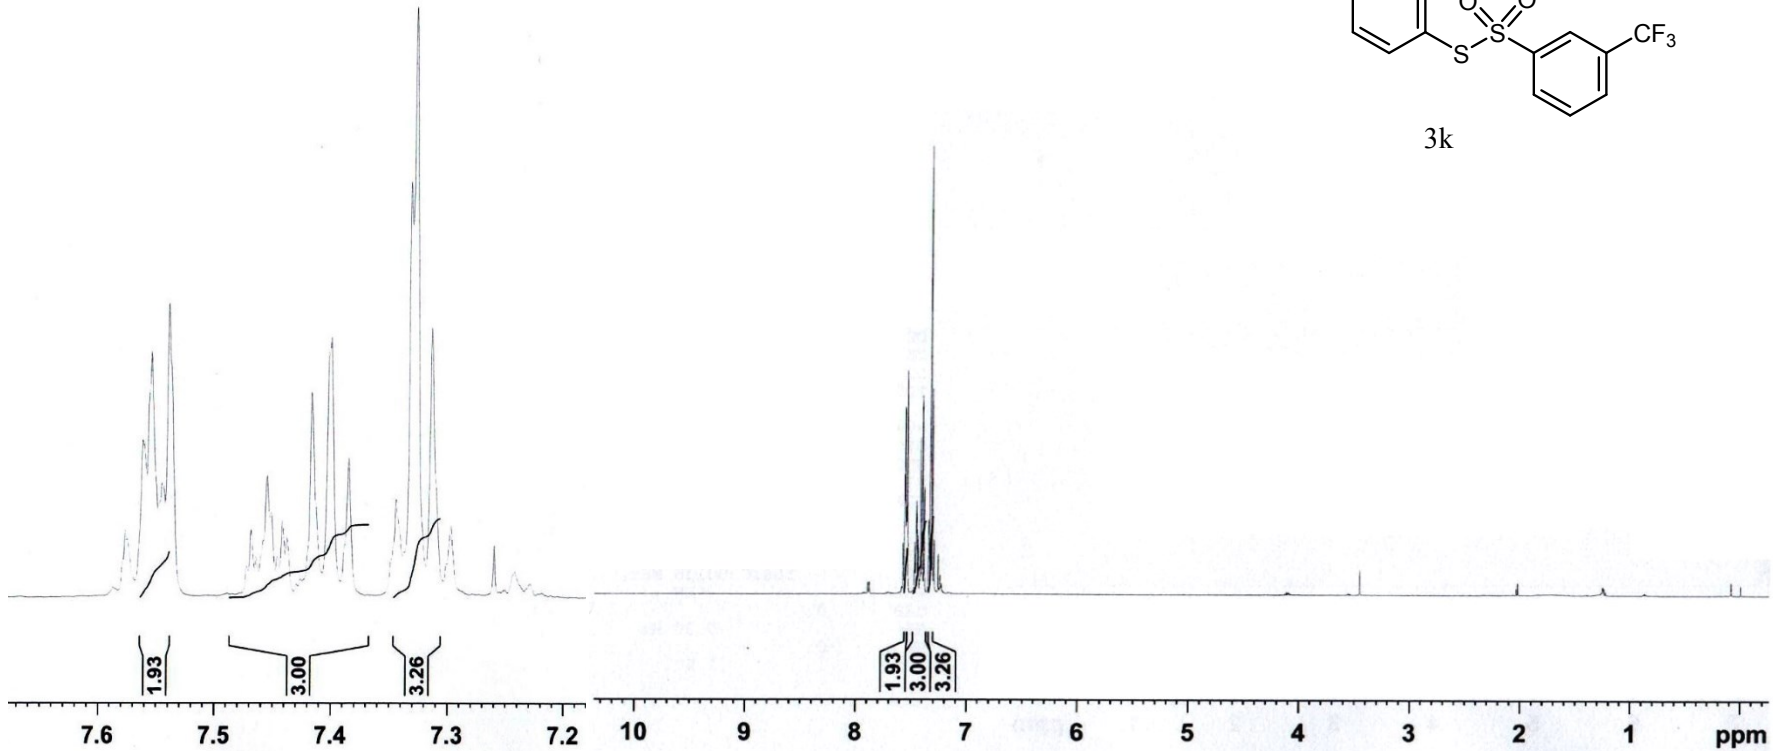

142.95  
136.58  
133.78  
131.43  
129.70  
129.48  
129.29  
129.23  
128.86  
127.97  
127.84  
127.54

77.40  
77.14  
76.89

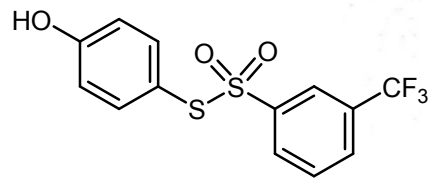

3k

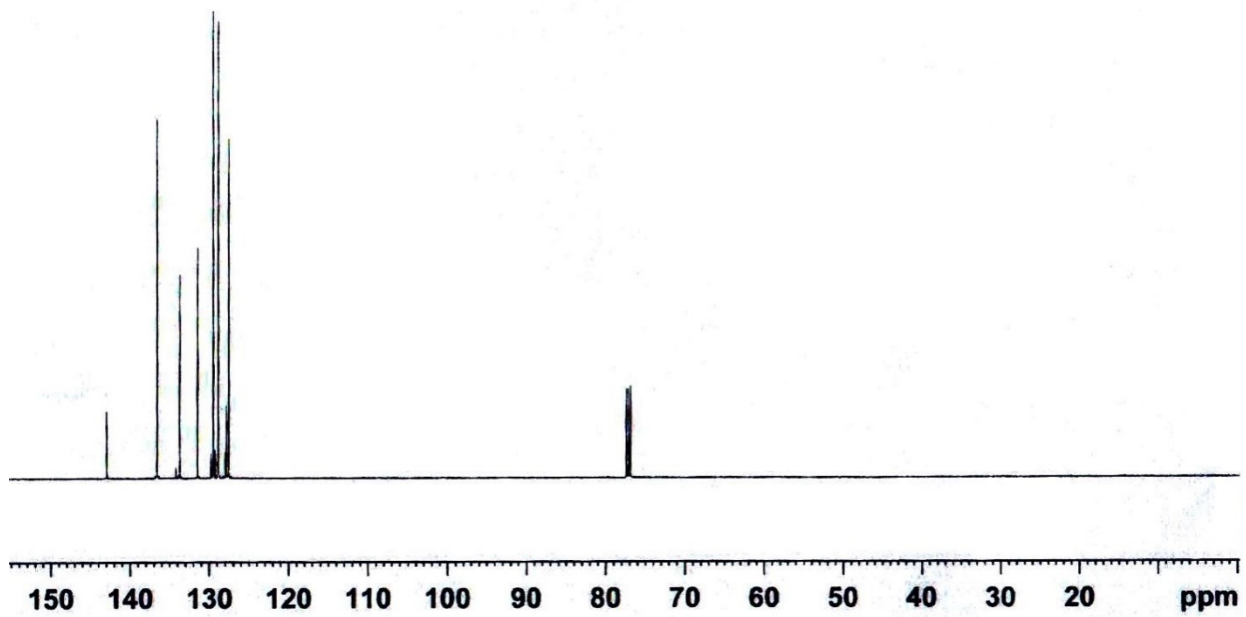

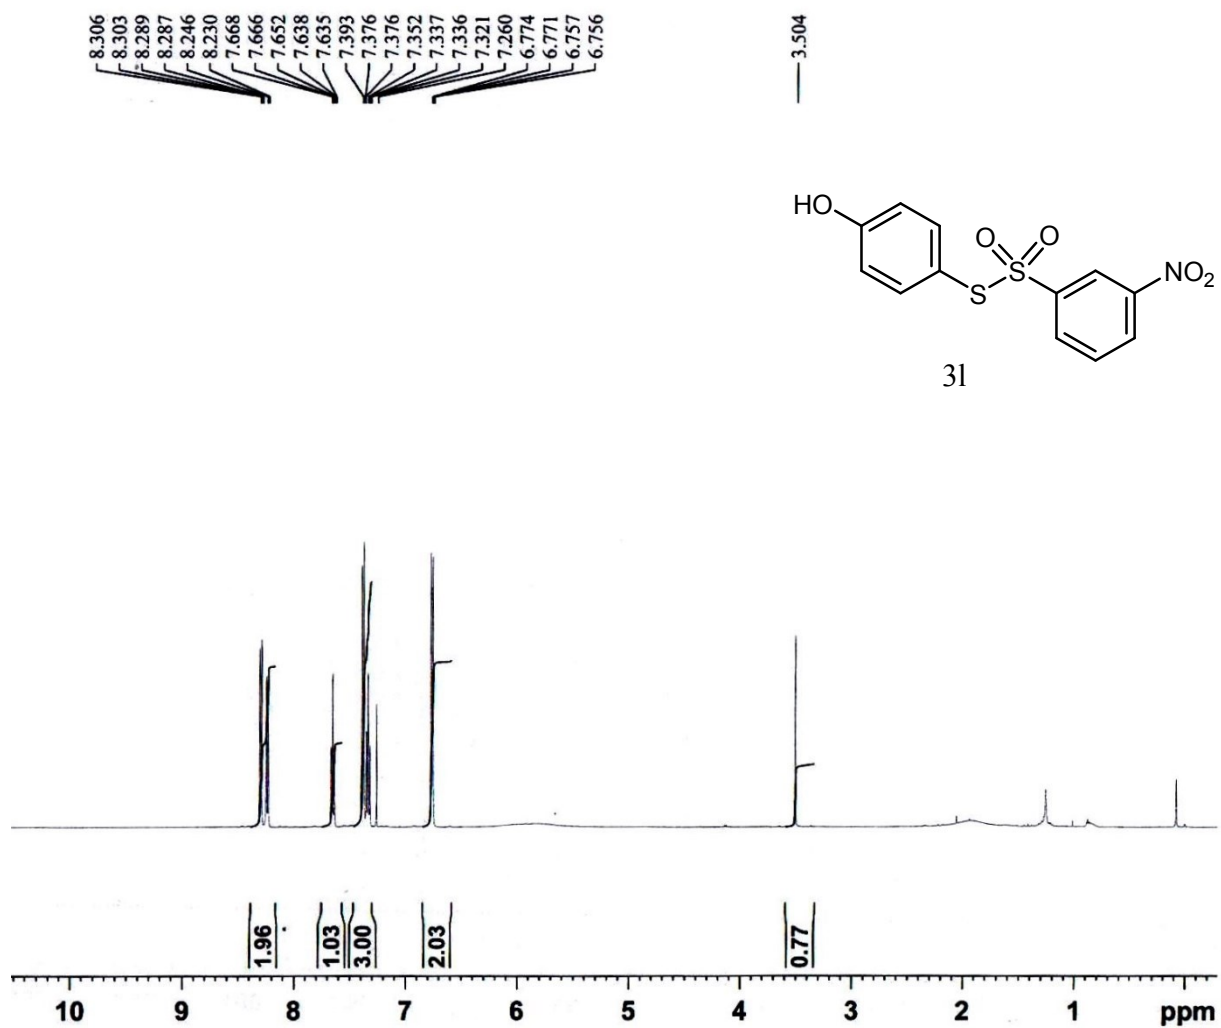



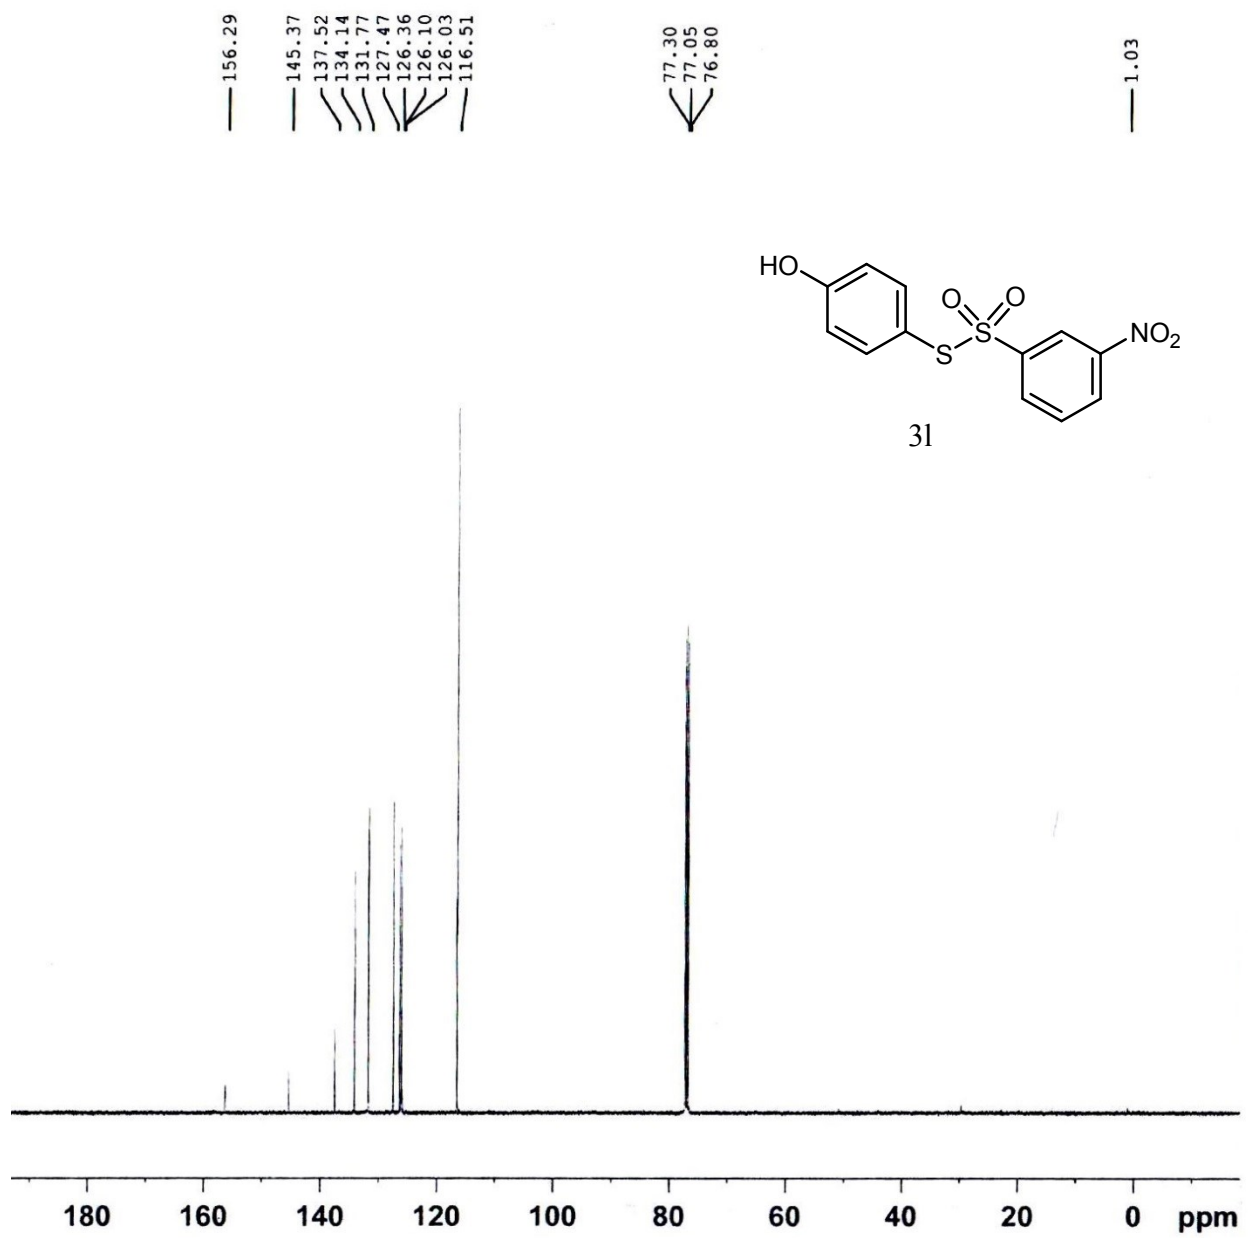

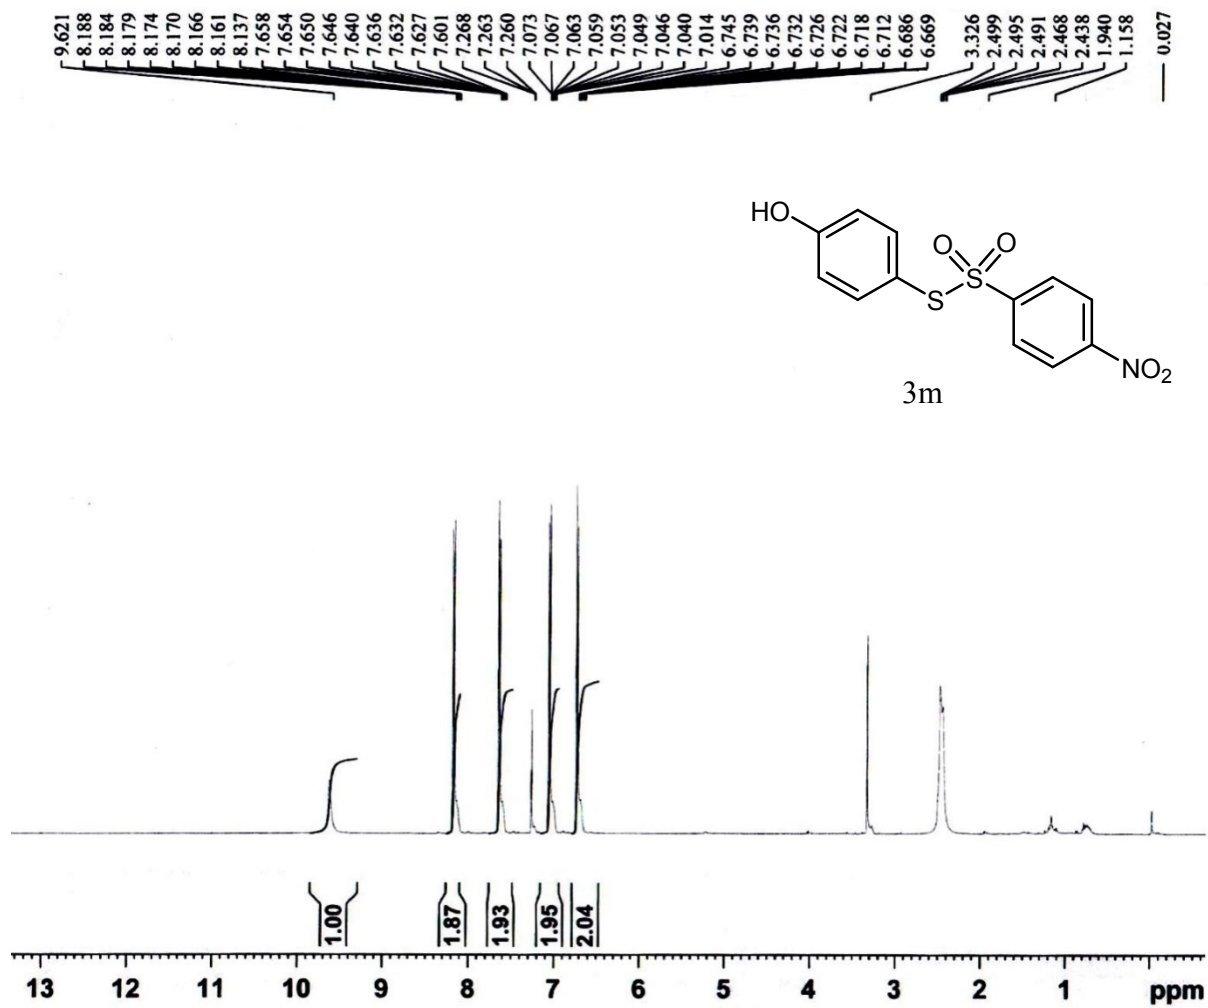

— 161.40  
— 150.23  
— 147.89  
— 138.29  
— 128.77  
— 123.99  
— 117.13  
— 115.24

77.45  
77.19  
76.94

40.31  
40.15  
39.98  
39.81  
39.65

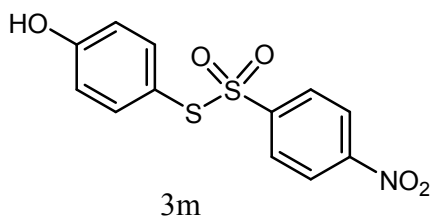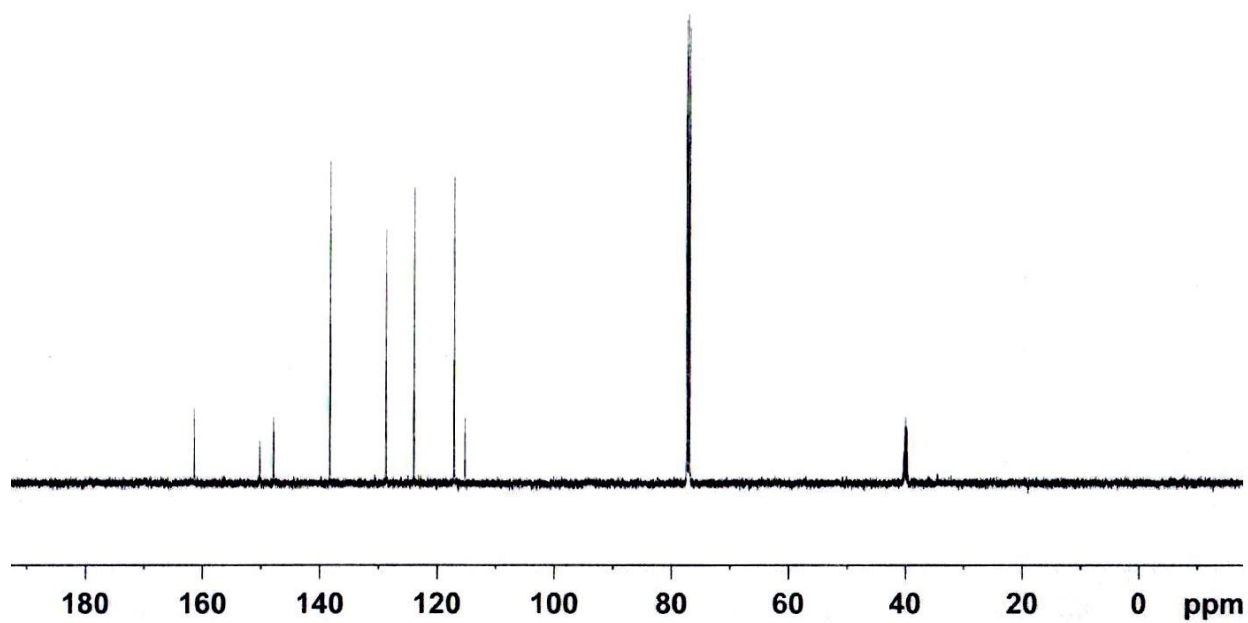

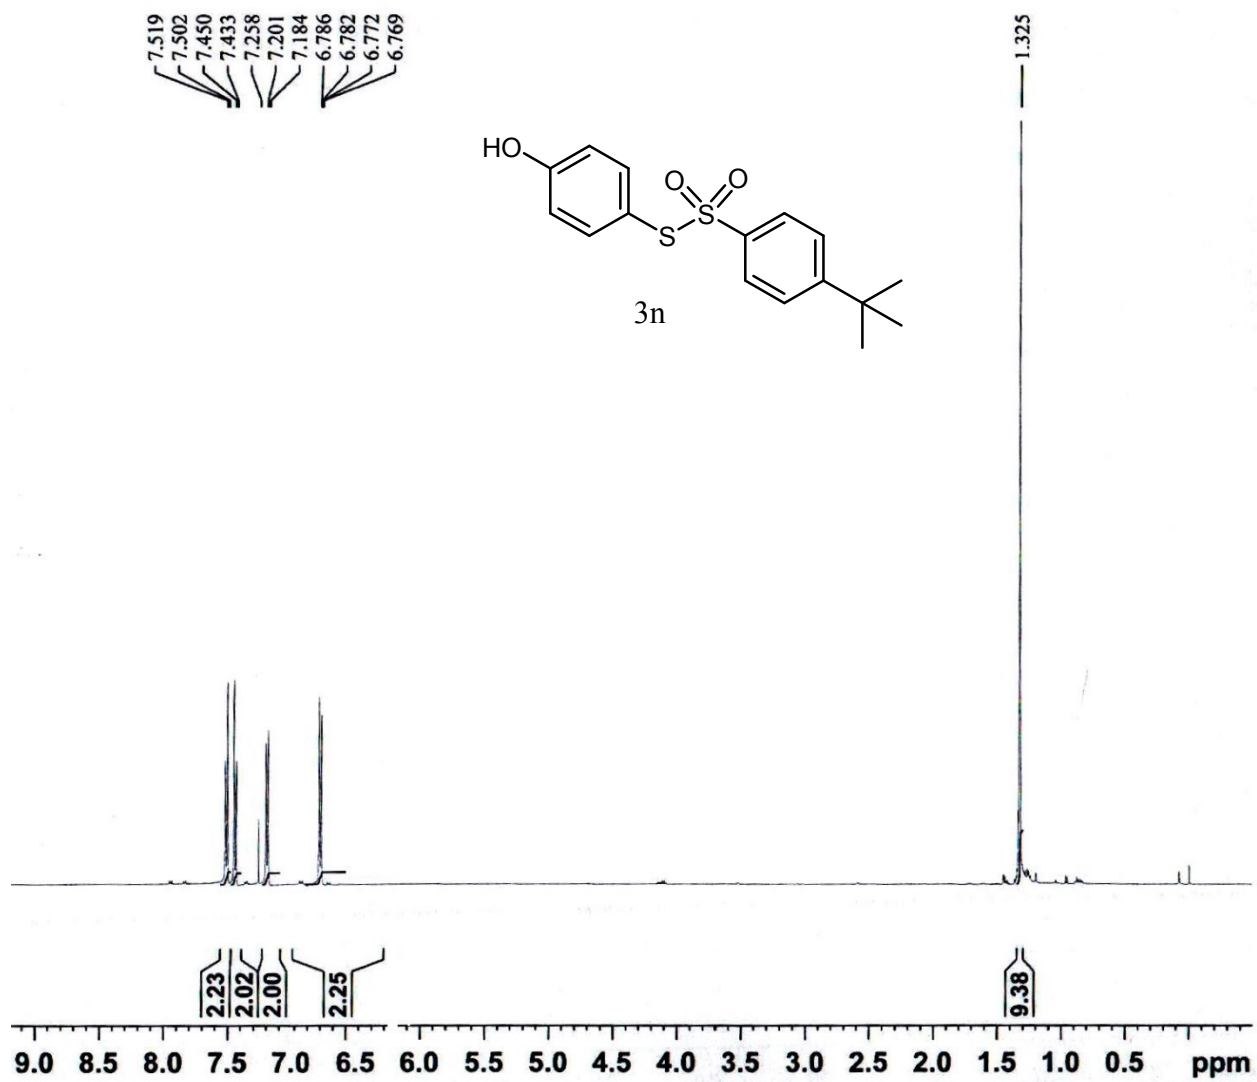

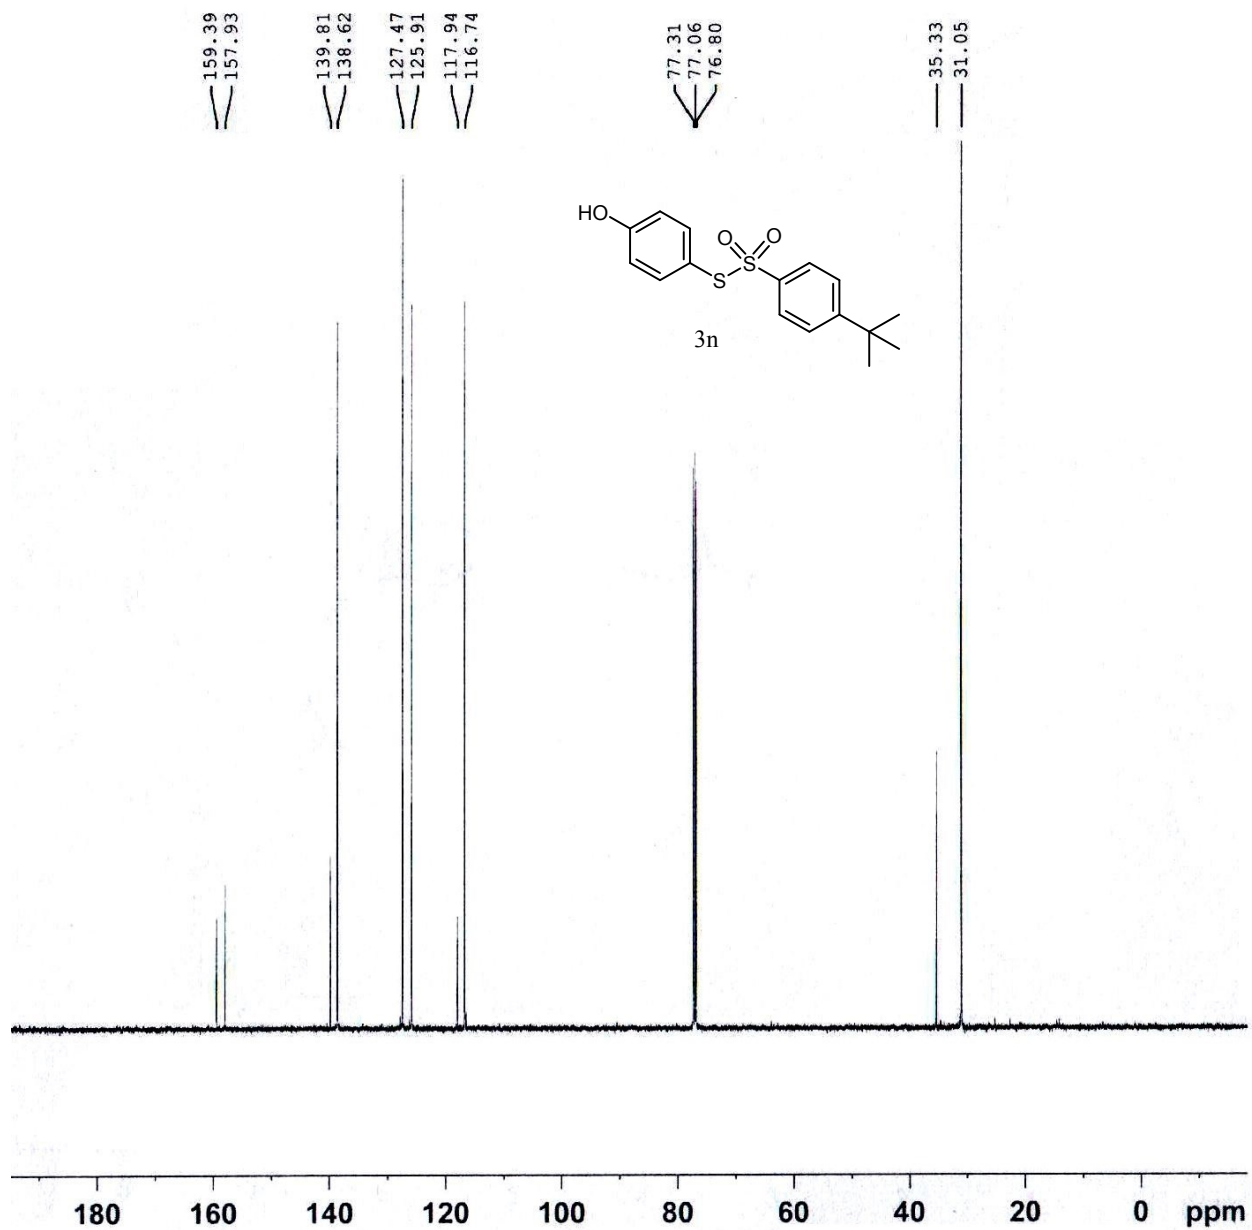

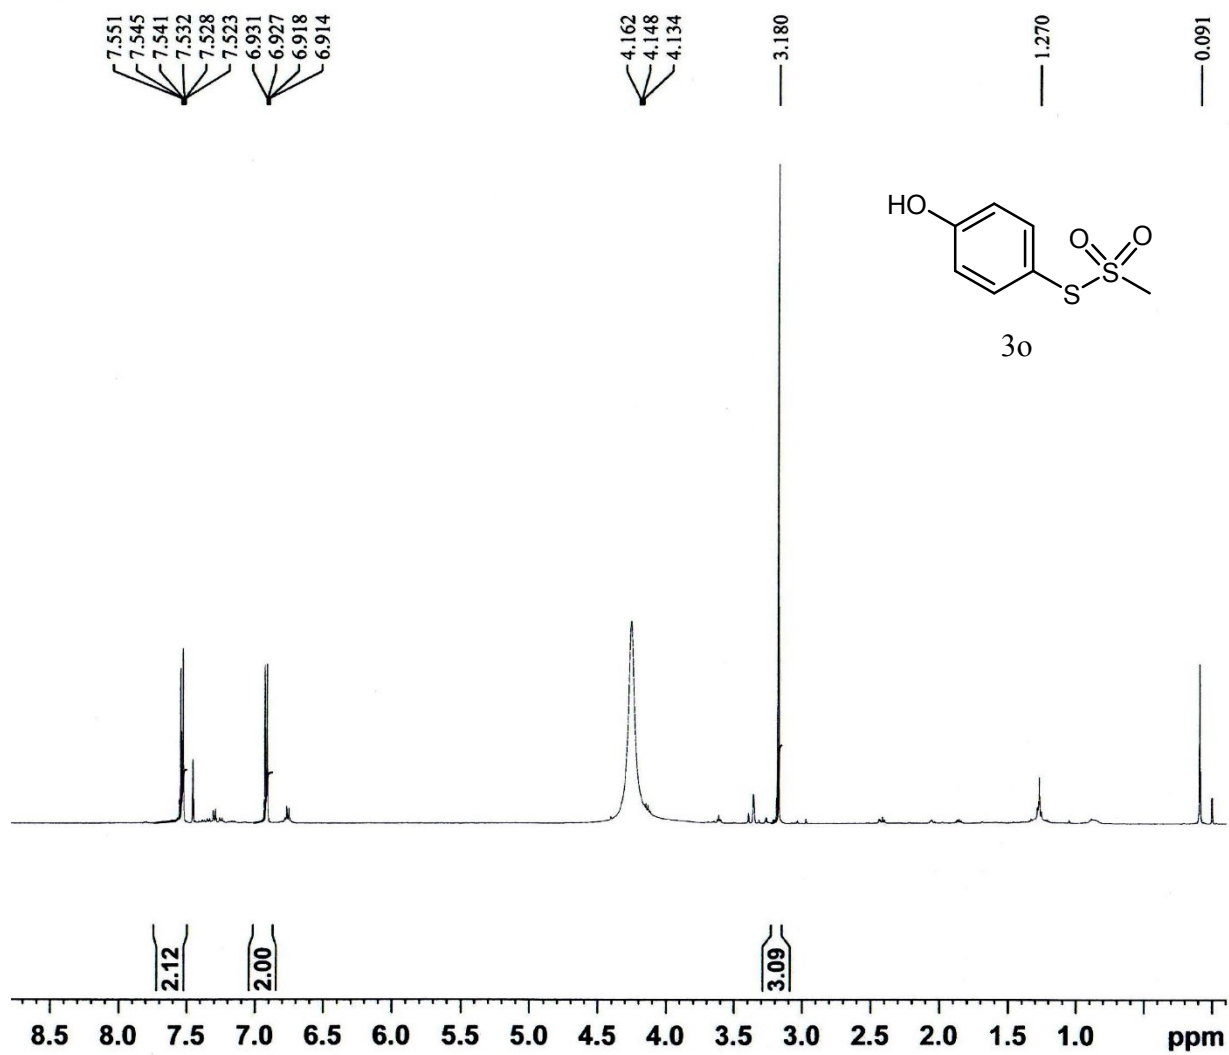

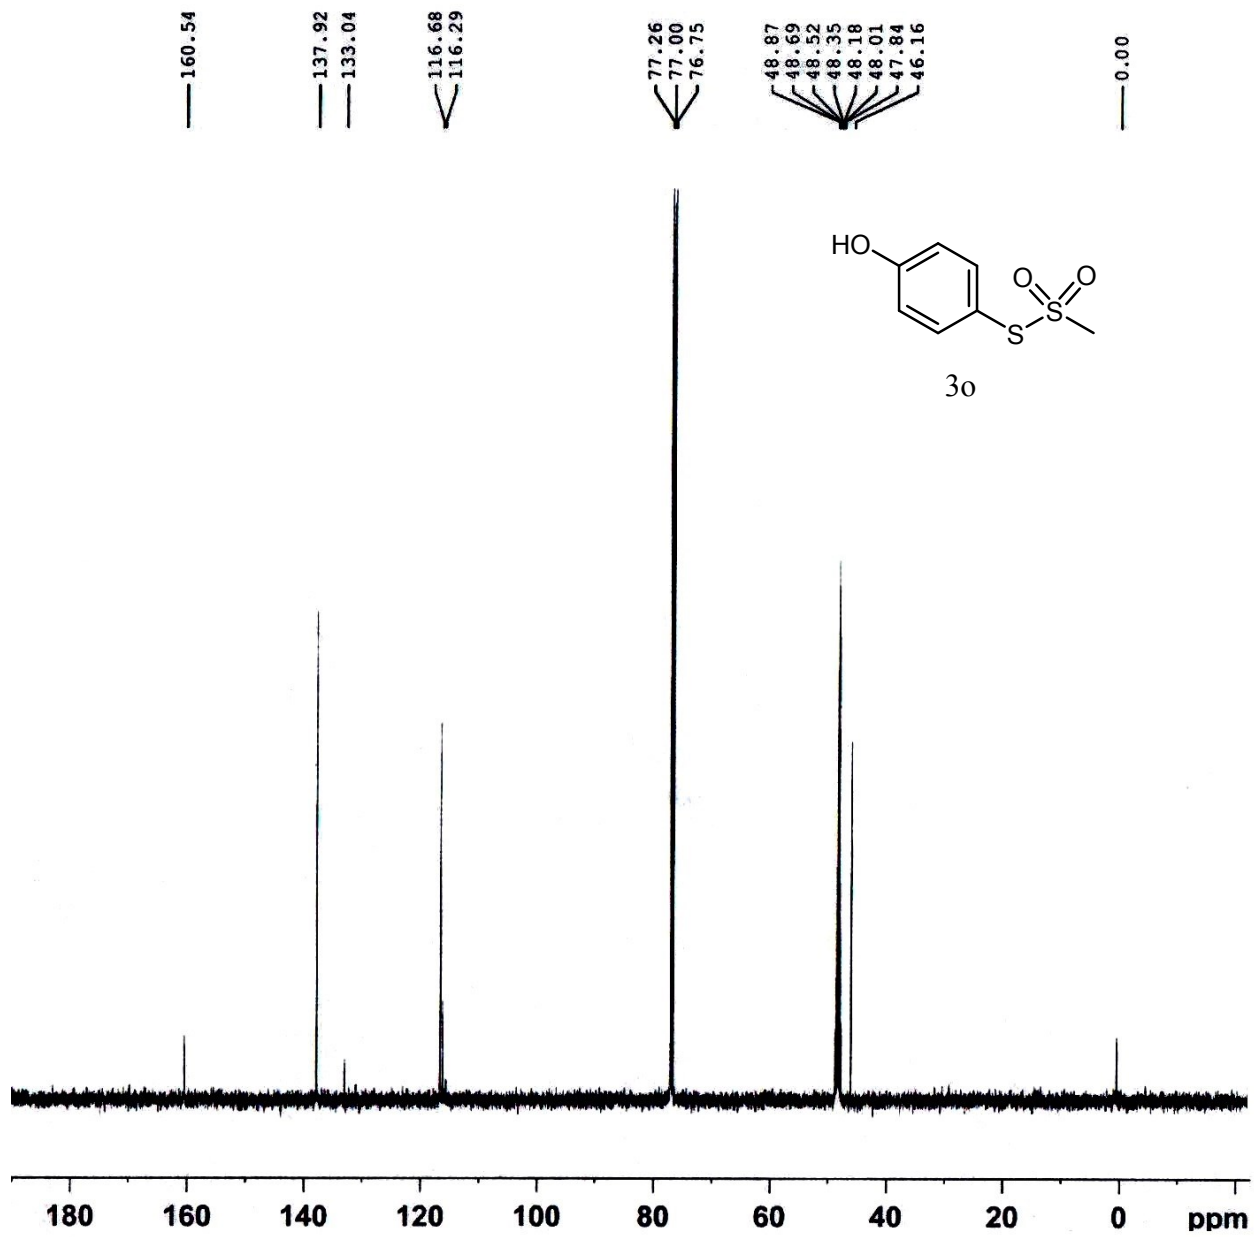

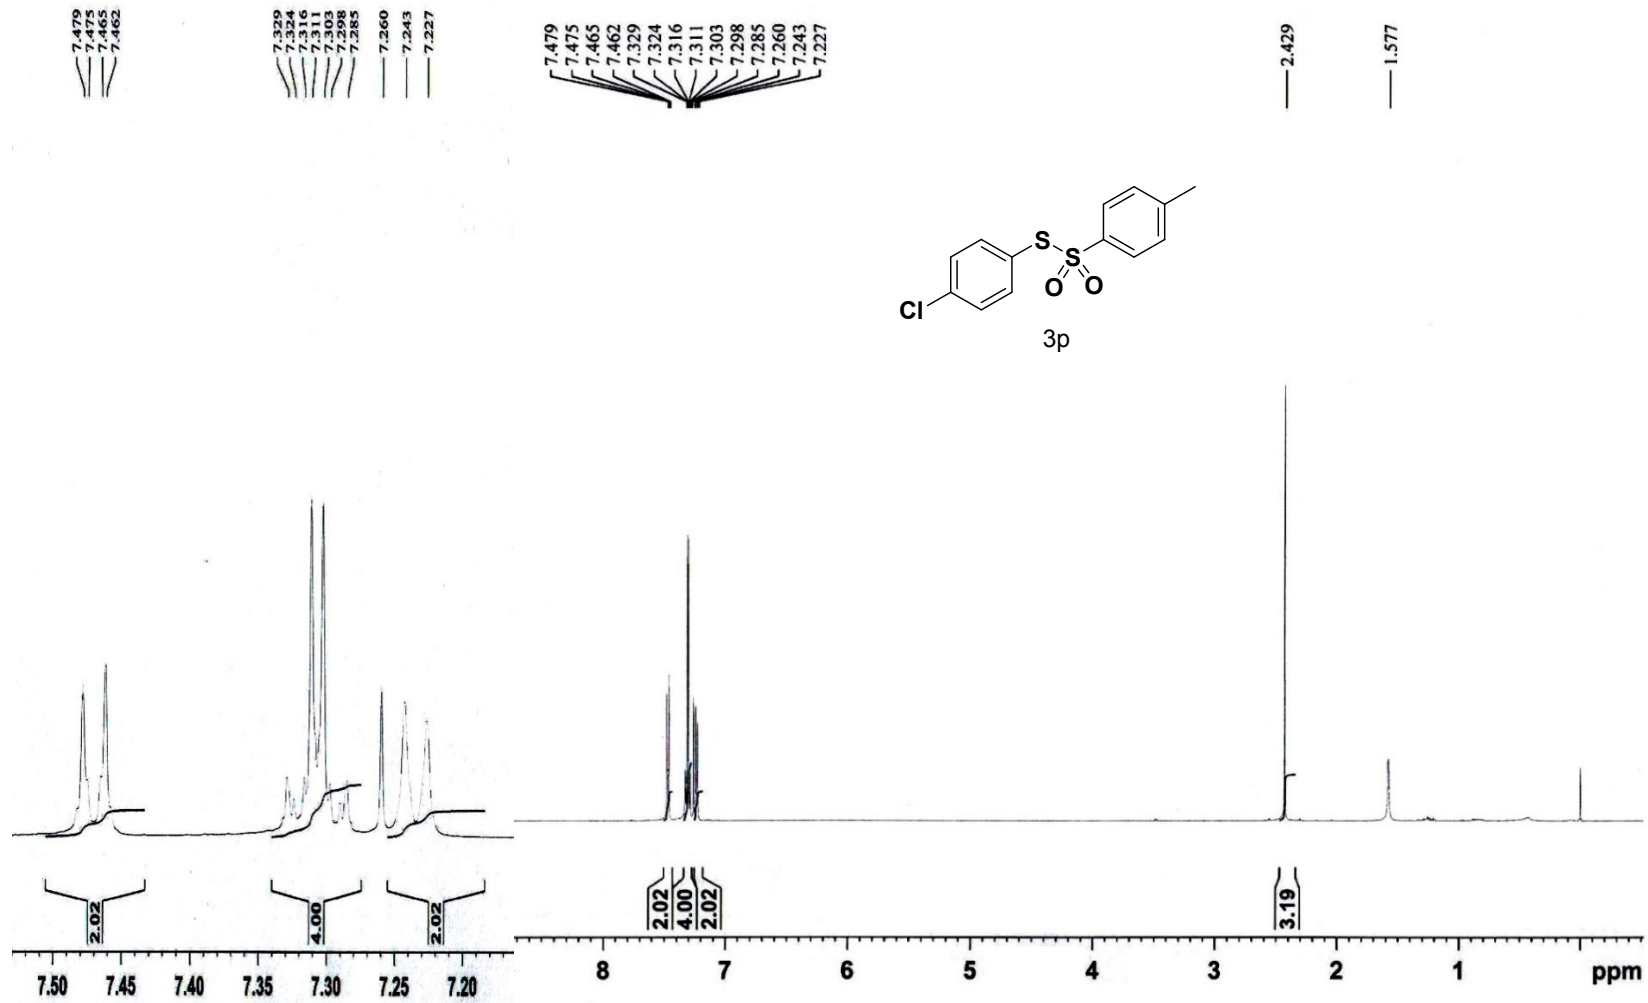



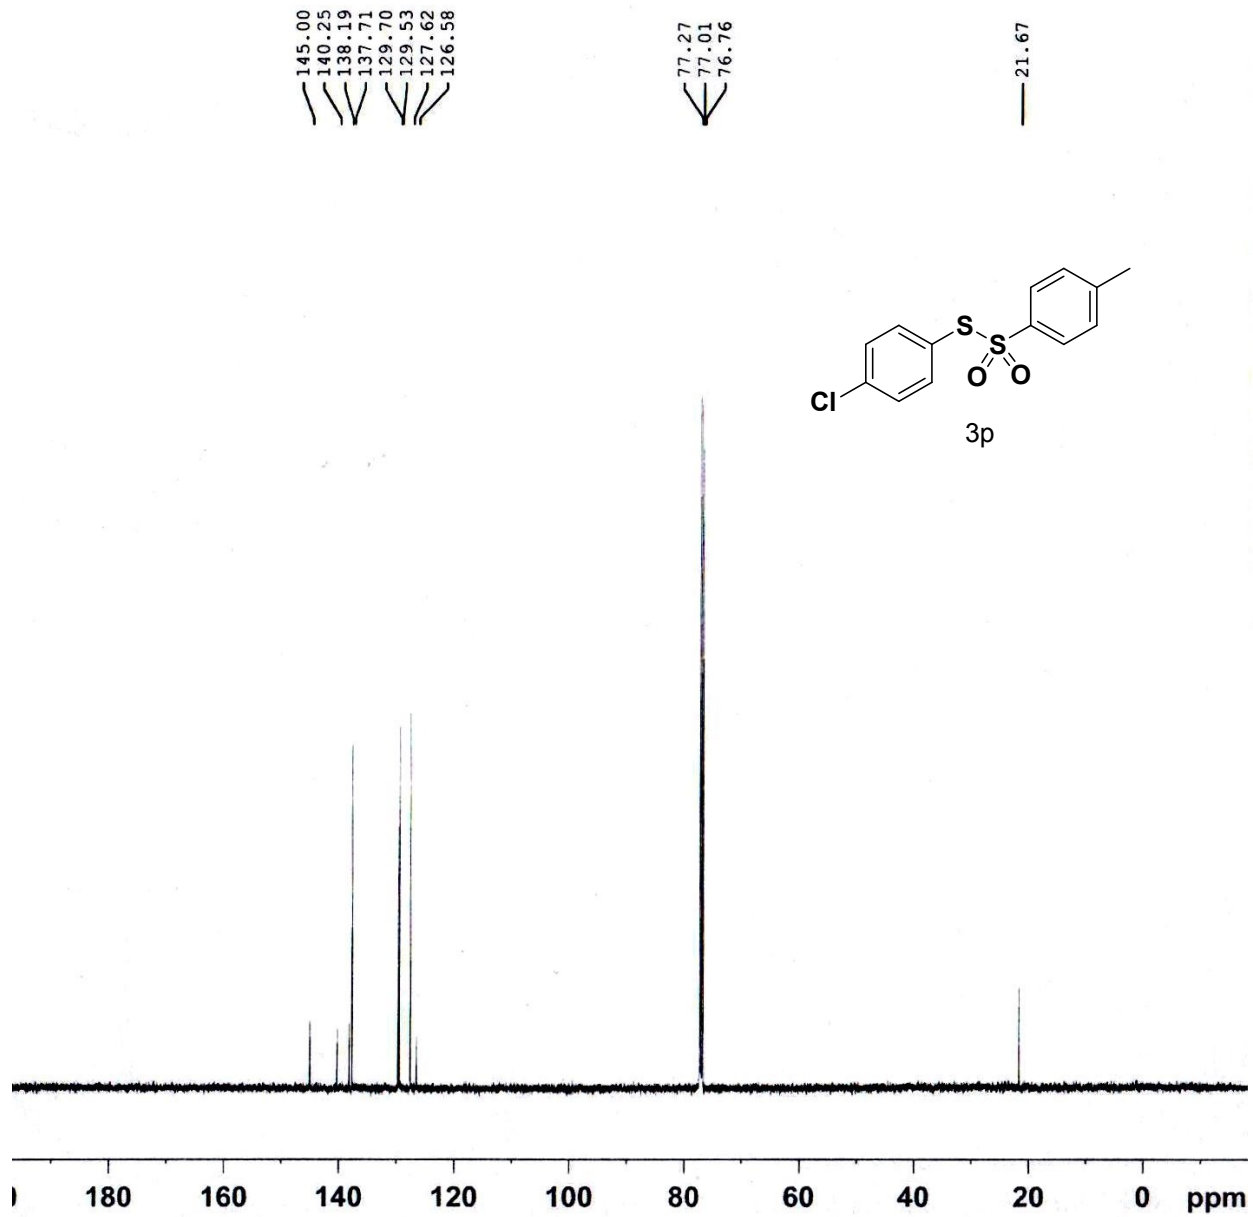

7.614  
7.600  
7.586  
7.468  
7.453  
7.437  
7.326  
7.322  
7.309  
7.292  
7.288  
7.279  
7.275  
7.260

1.572

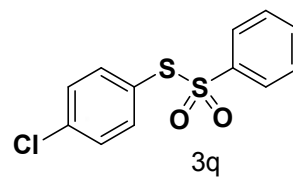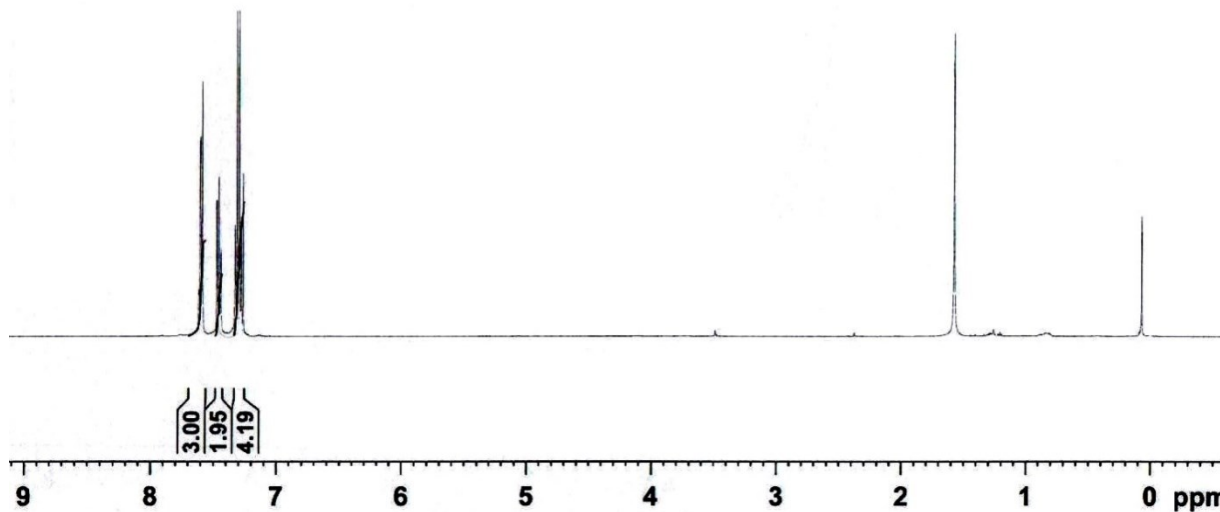

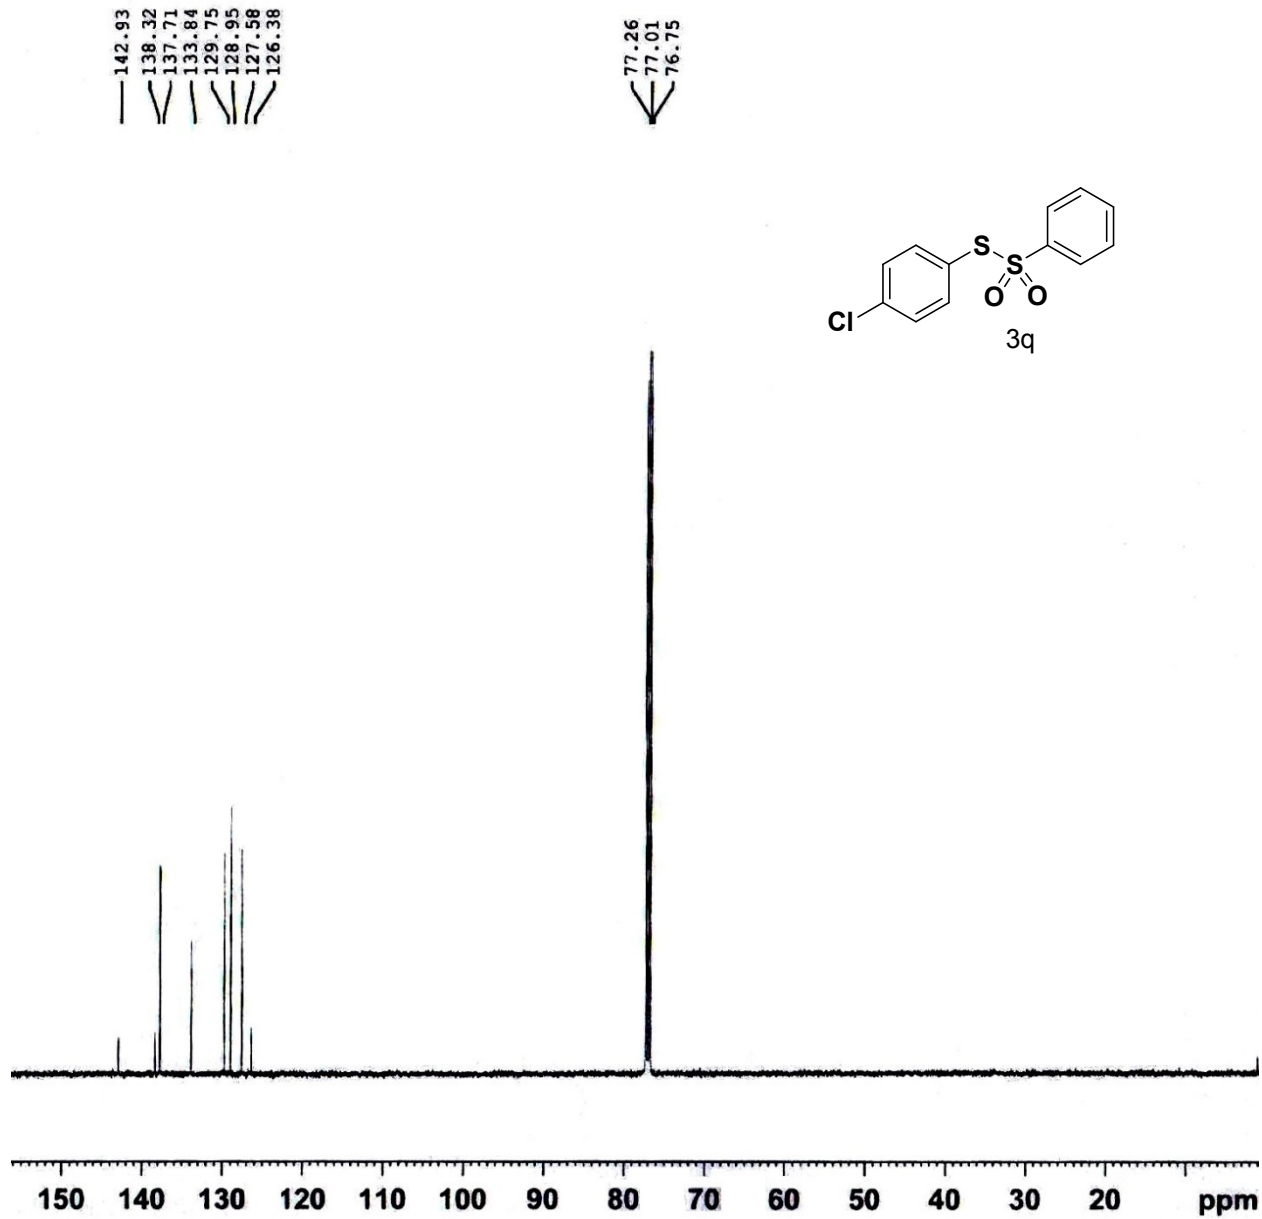

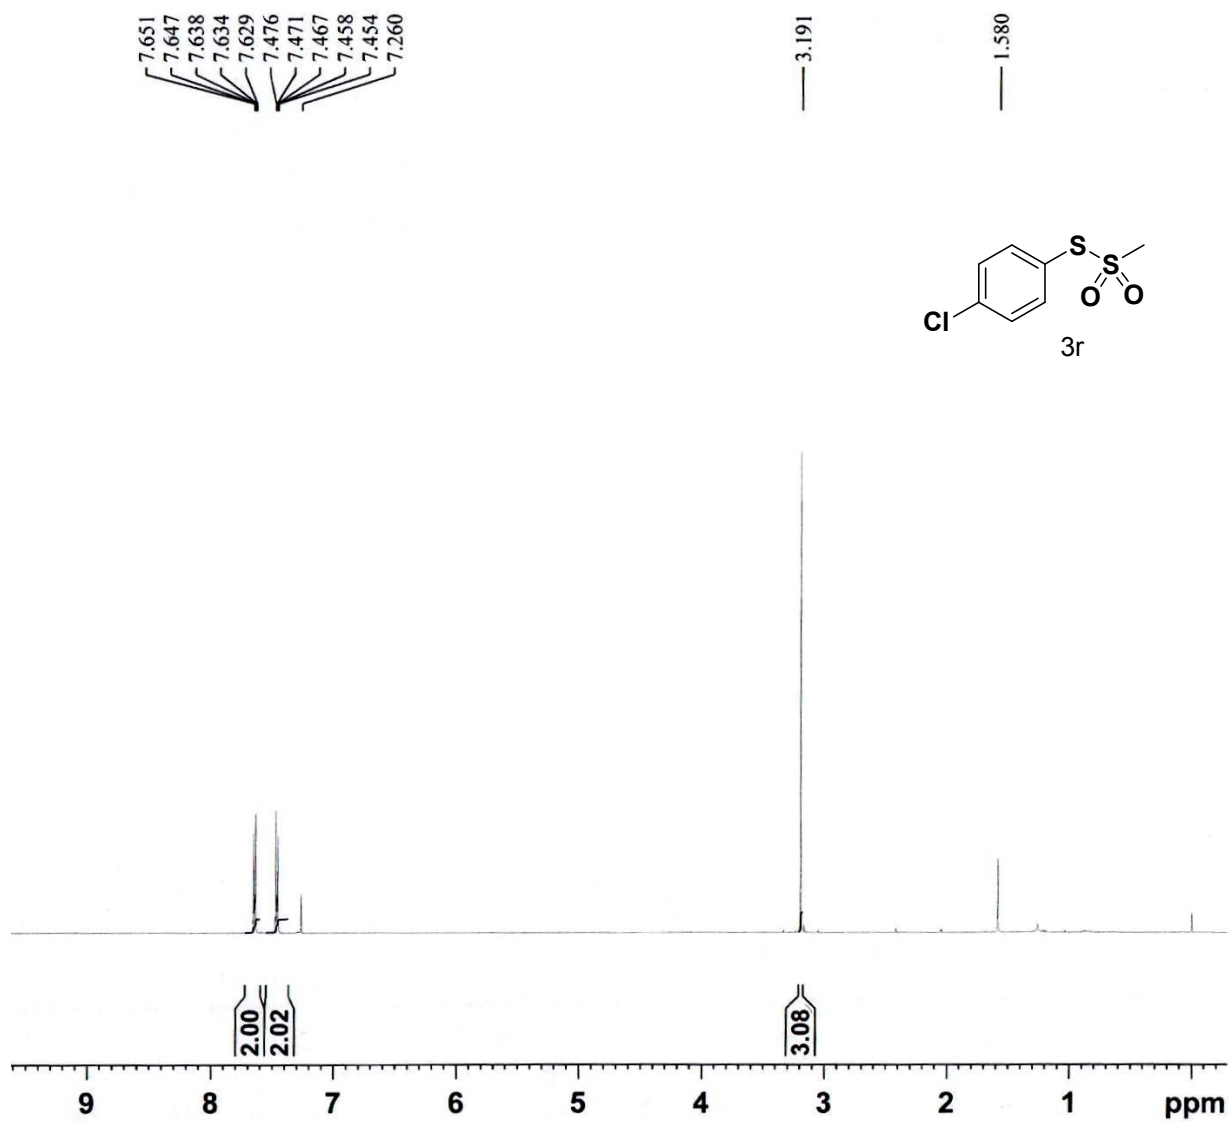

138.58  
137.37  
130.22  
126.38

77.28  
77.03  
76.77

47.62

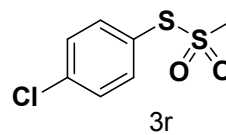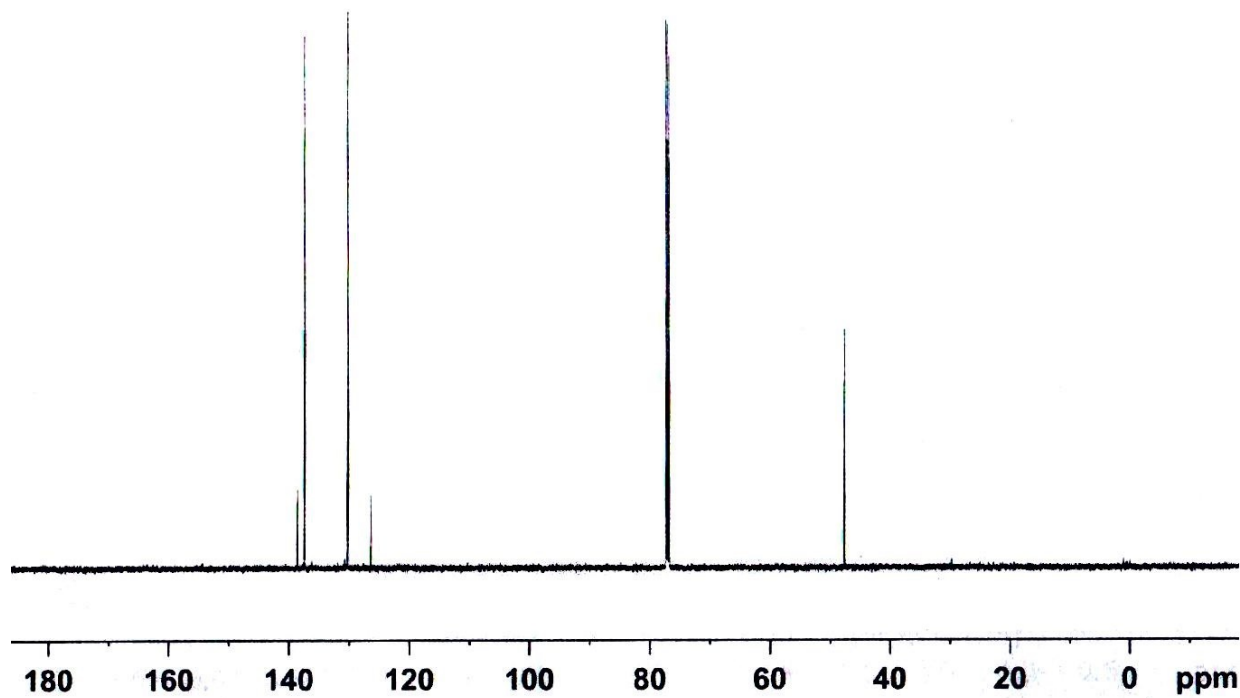

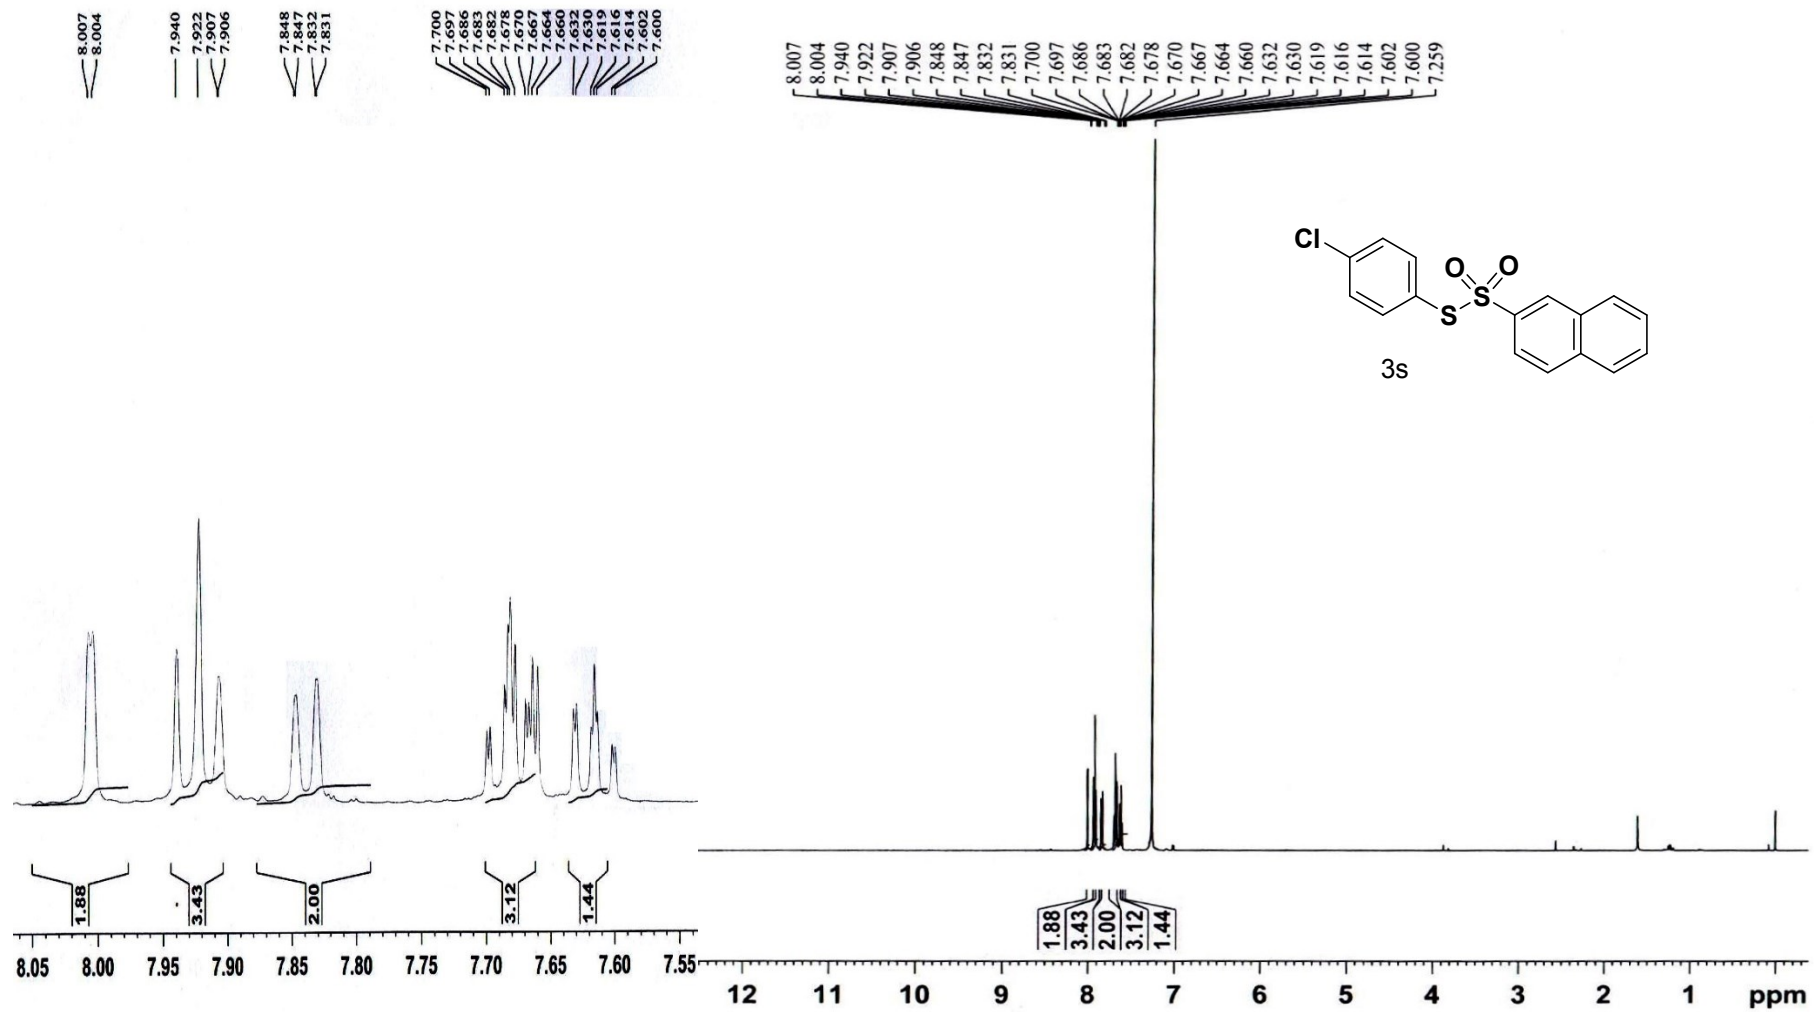

139.53  
138.33  
137.79  
135.19  
131.58  
129.74  
129.61  
129.57  
129.50  
129.32  
127.99  
127.92  
126.51  
122.29

77.32  
77.06  
76.81

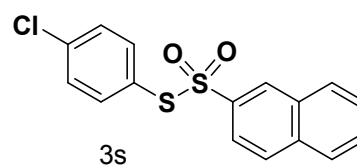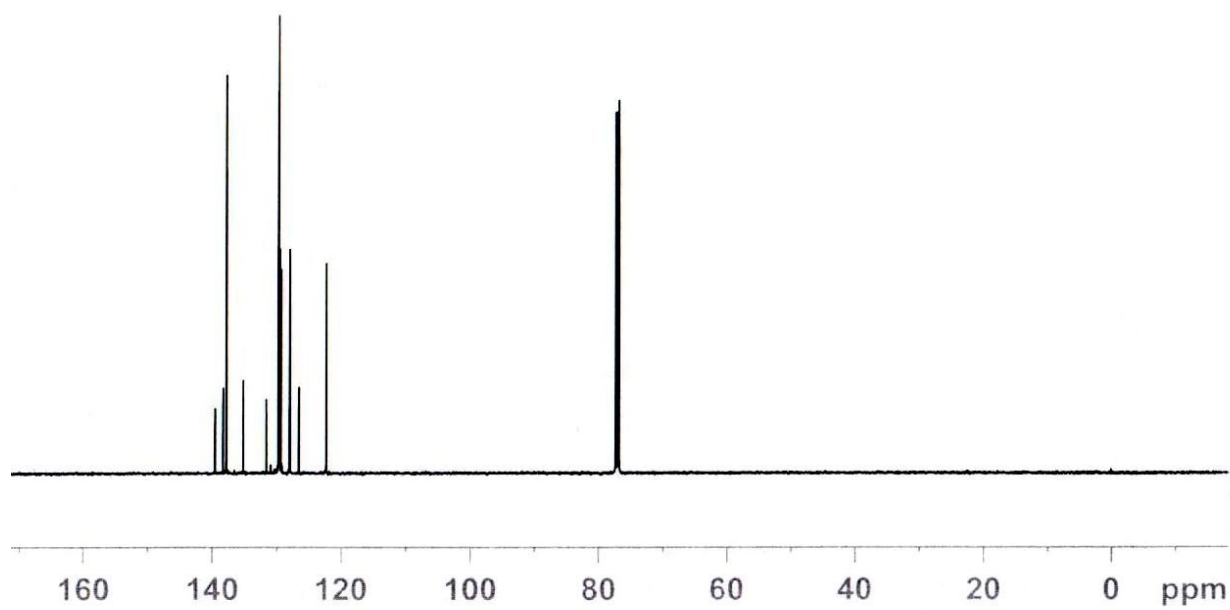

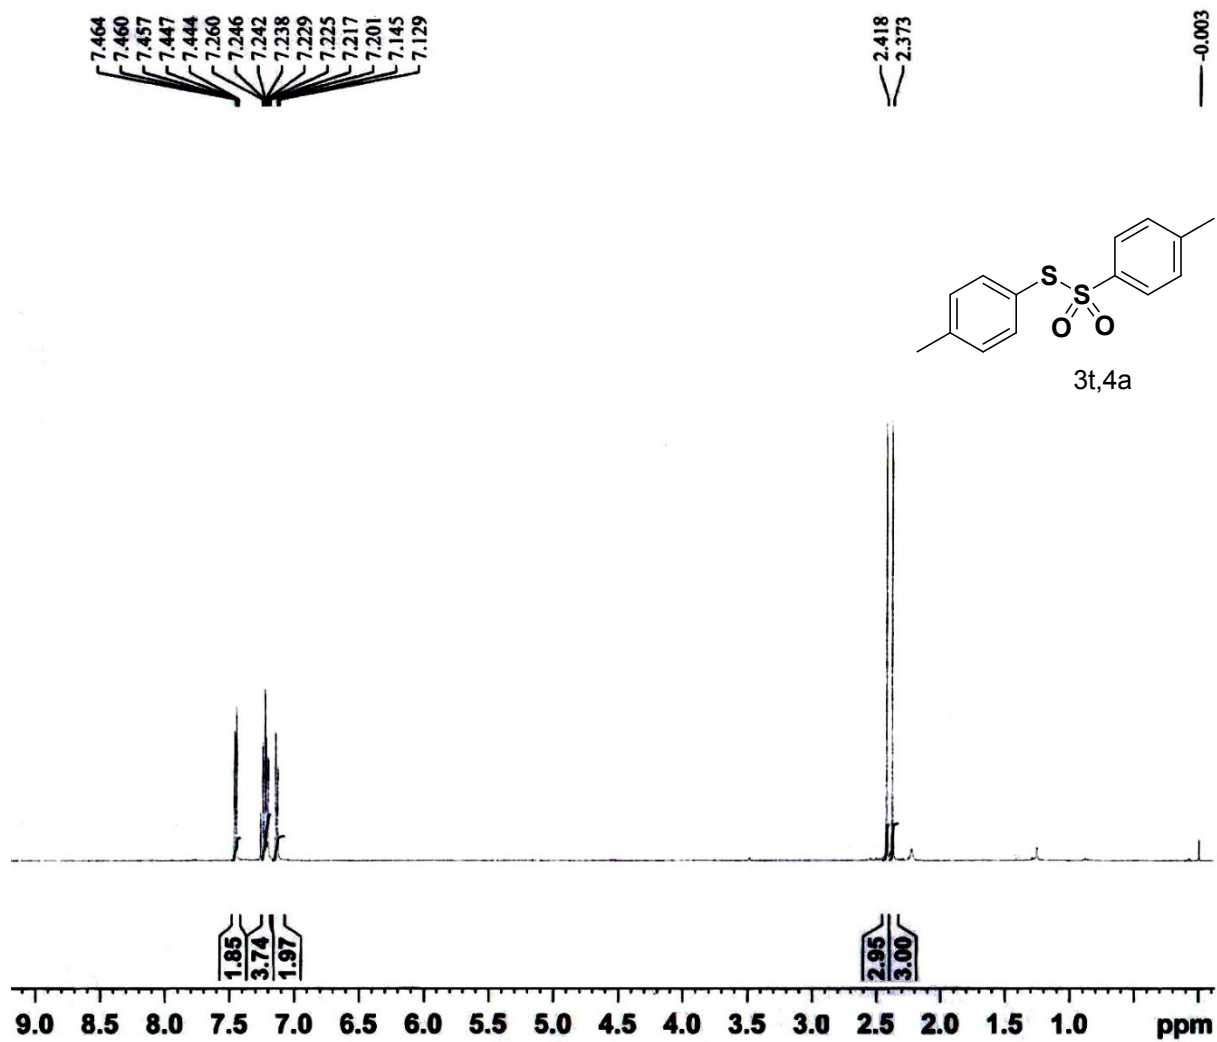



144.624  
142.081  
140.433  
136.508  
130.226  
129.389  
127.606  
124.571

77.317  
77.063  
76.808

21.688  
21.507

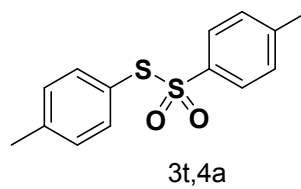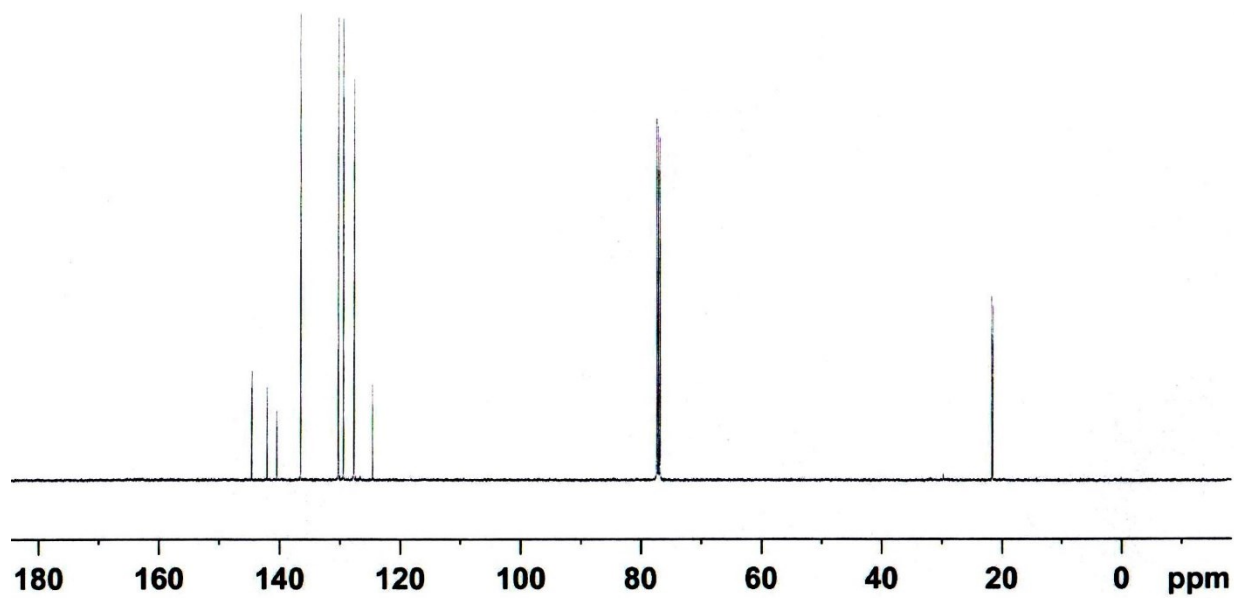

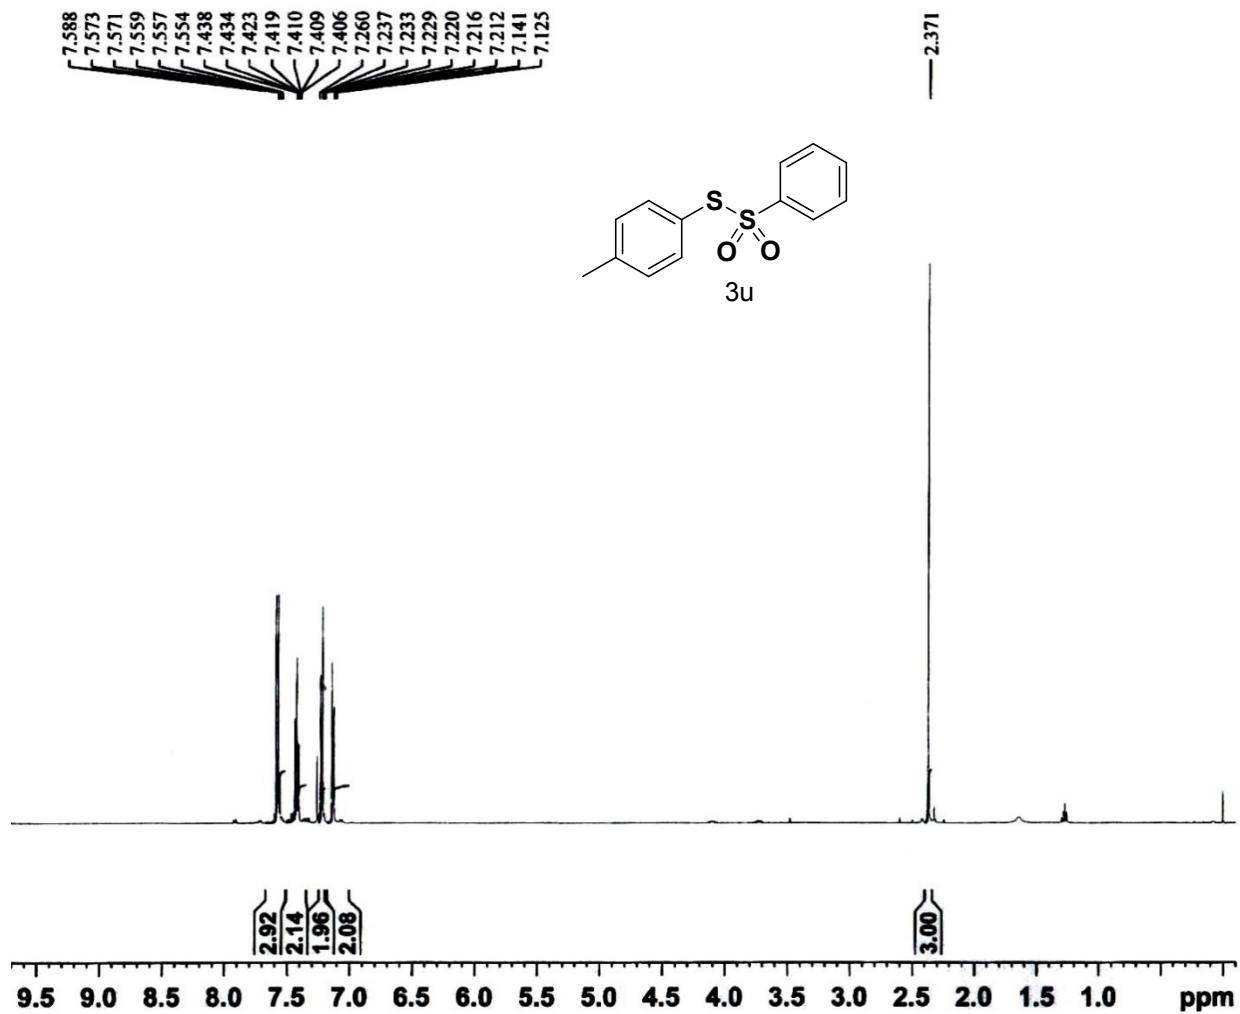

143.16  
142.18  
136.49  
133.53  
130.25  
128.79  
127.57  
124.43

77.30  
77.04  
76.79

21.46

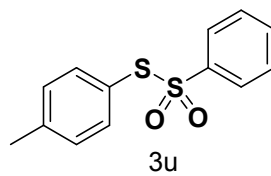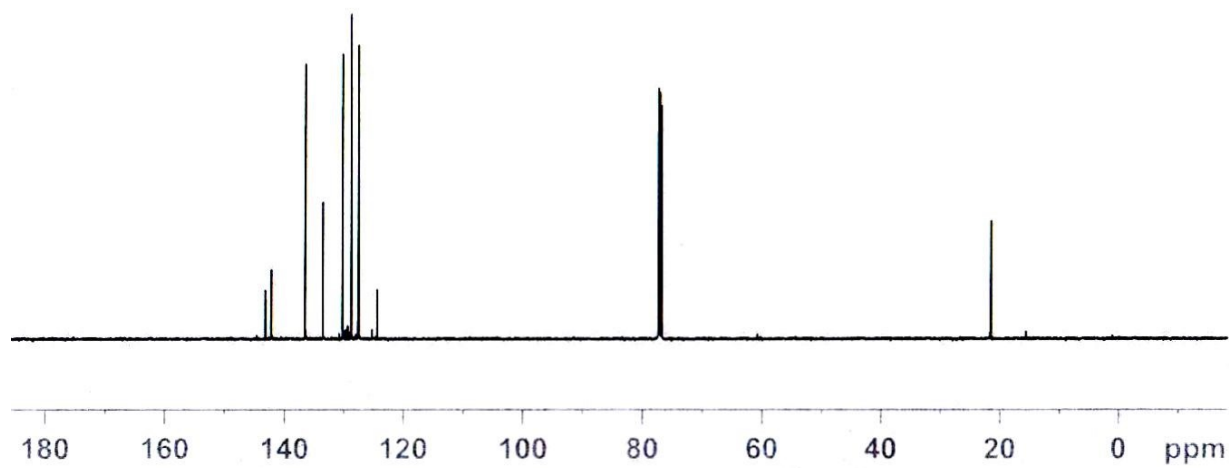

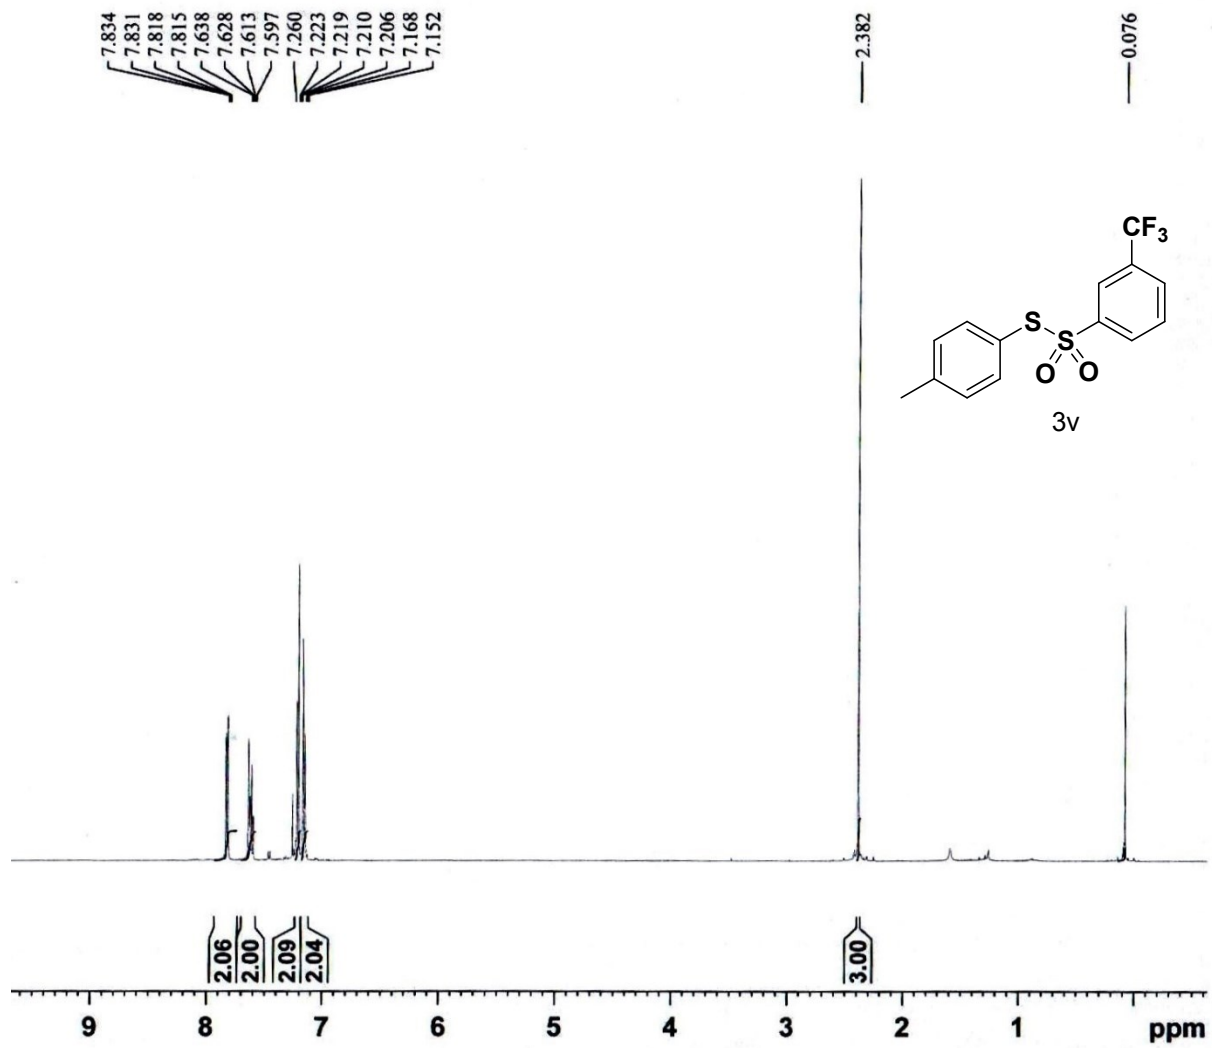

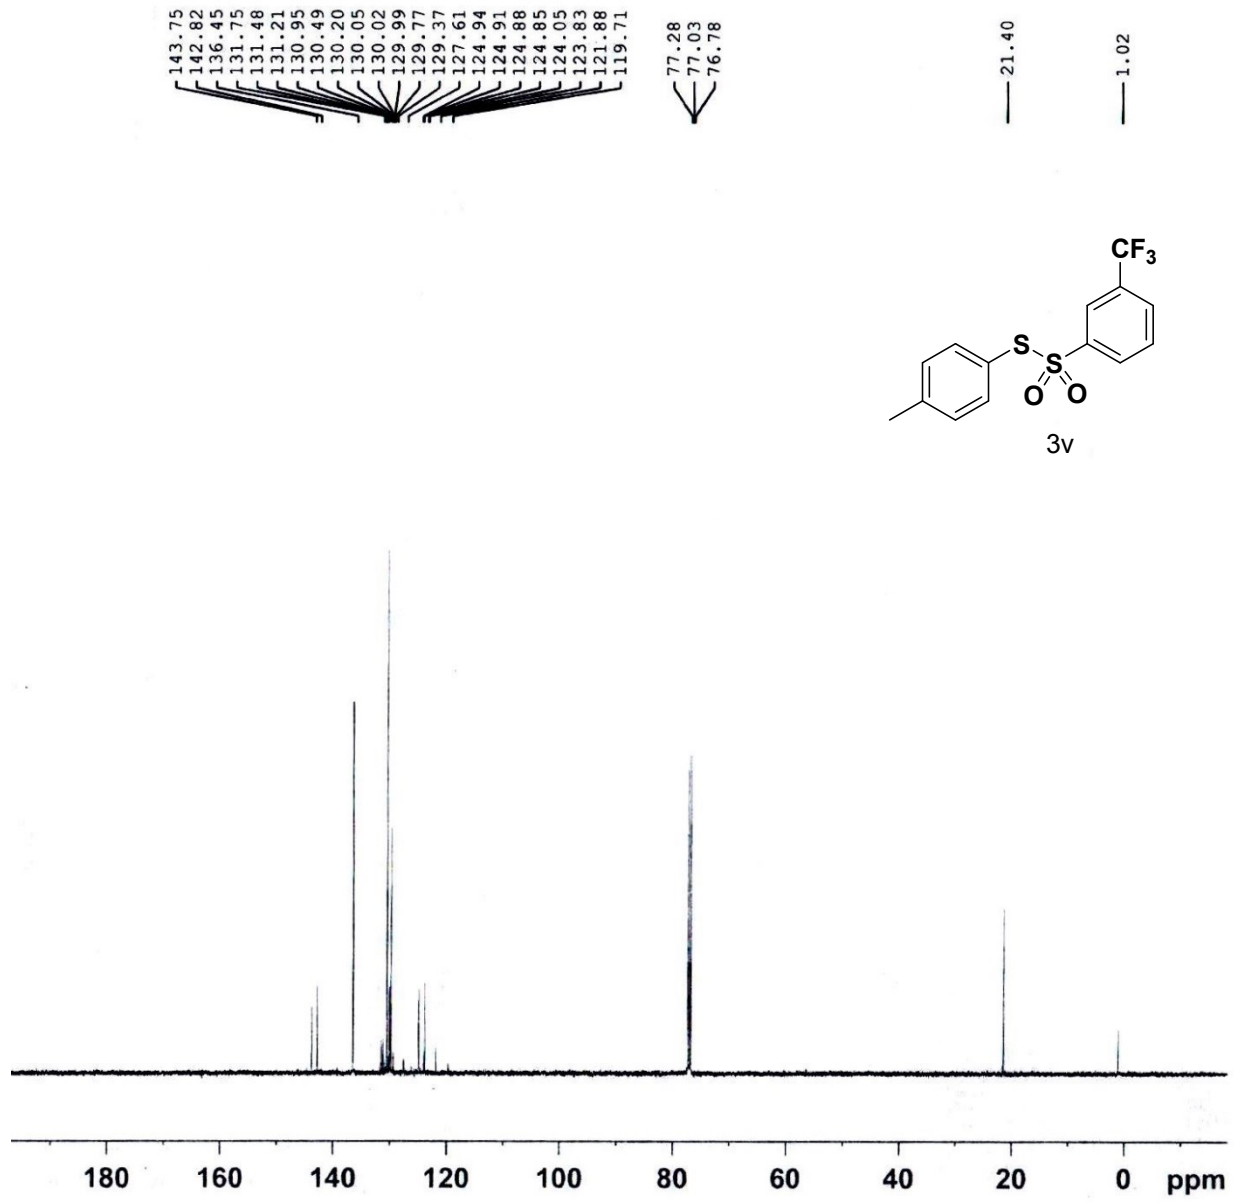

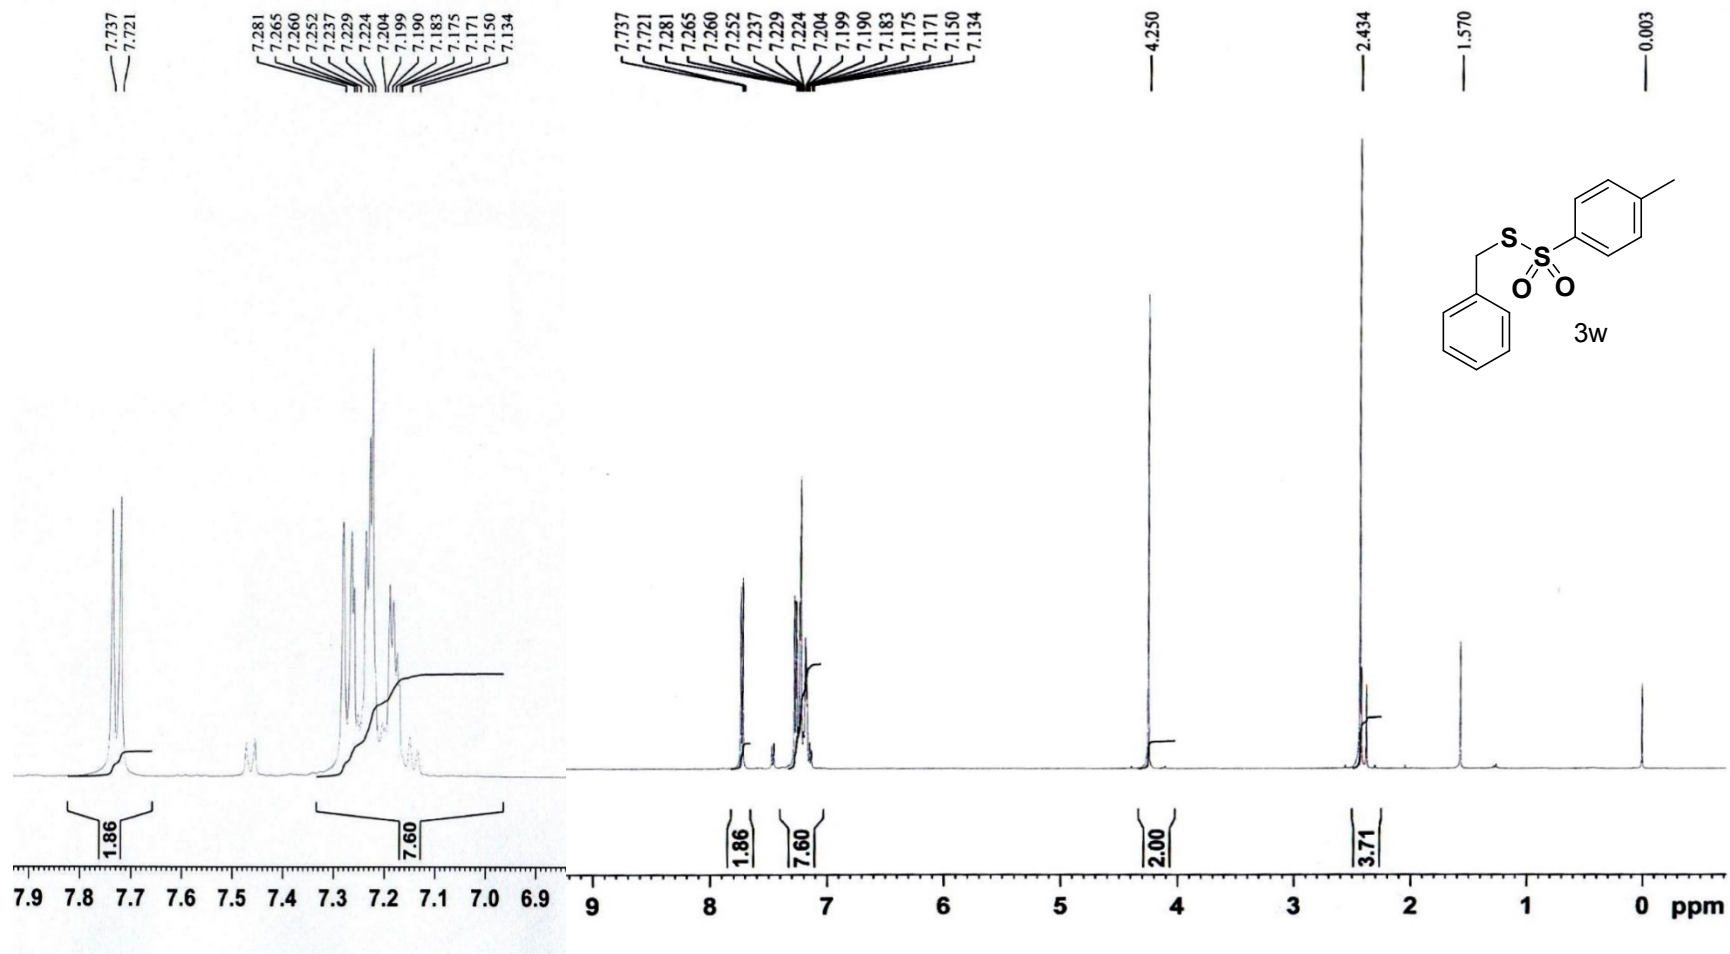

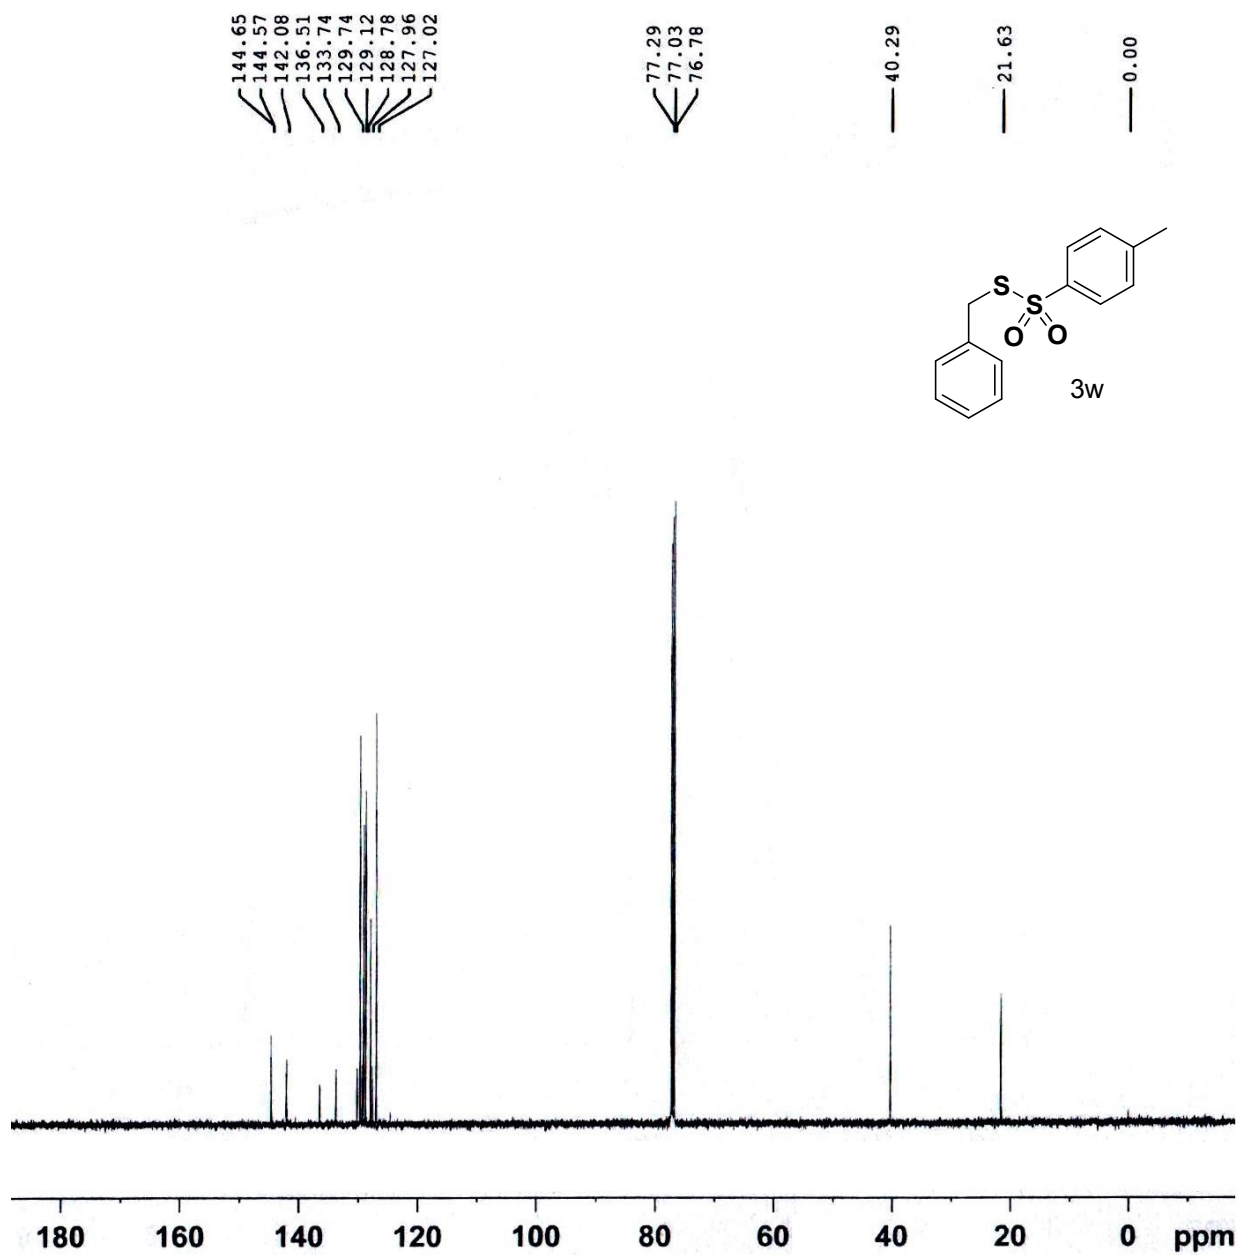

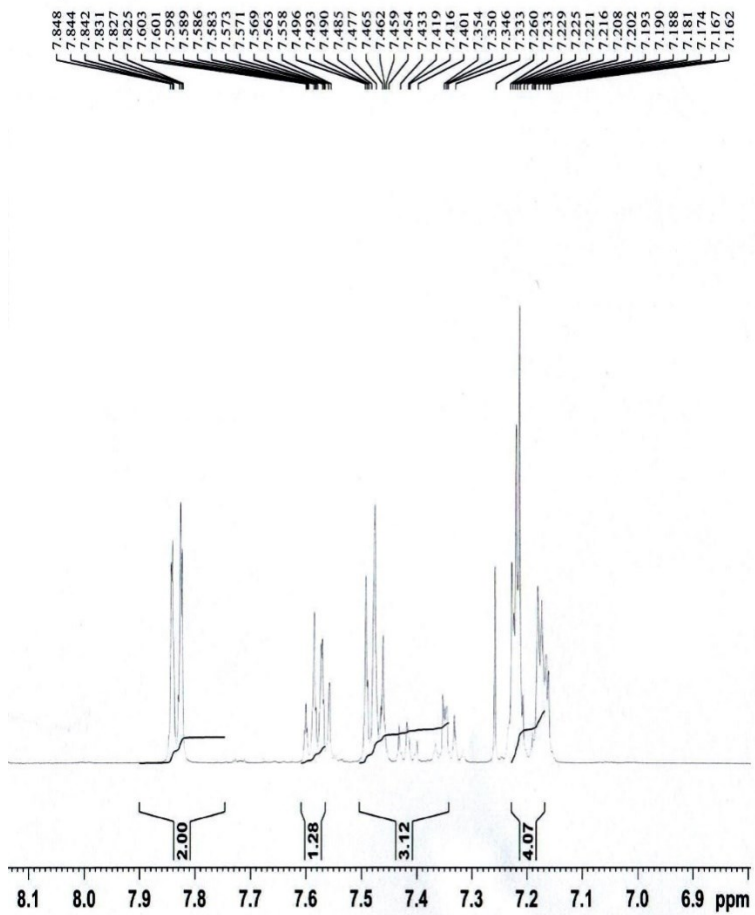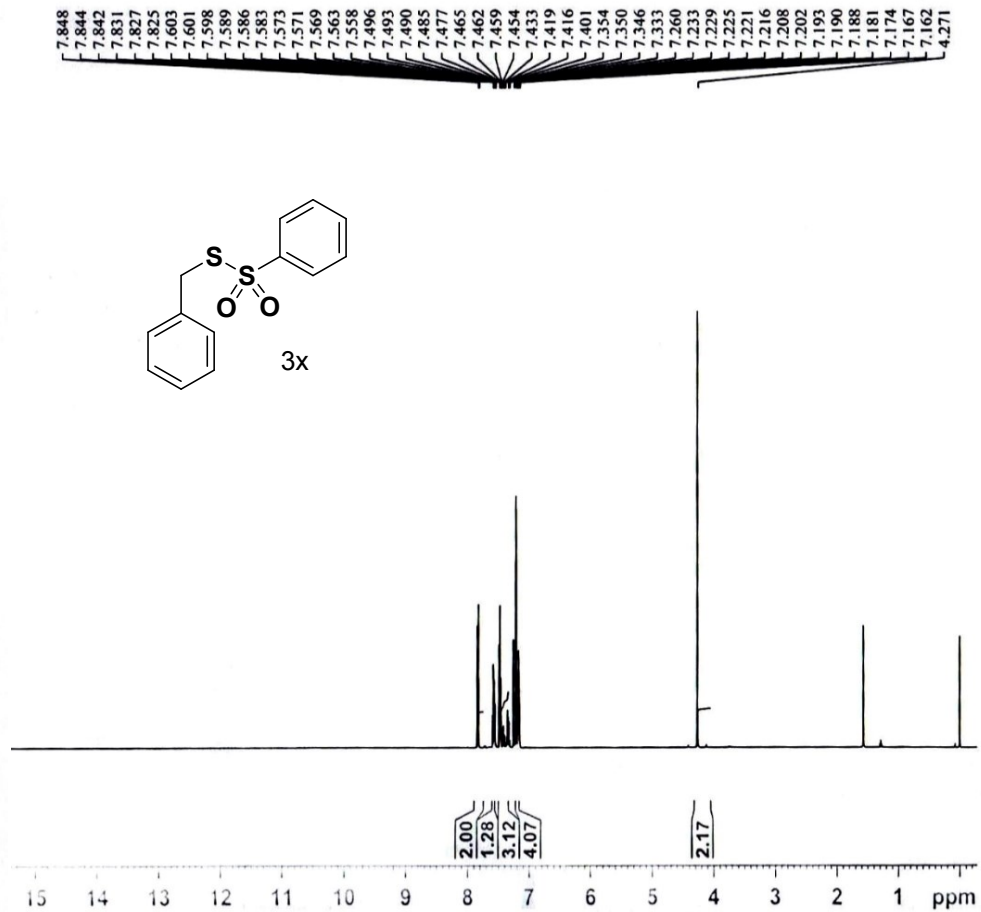



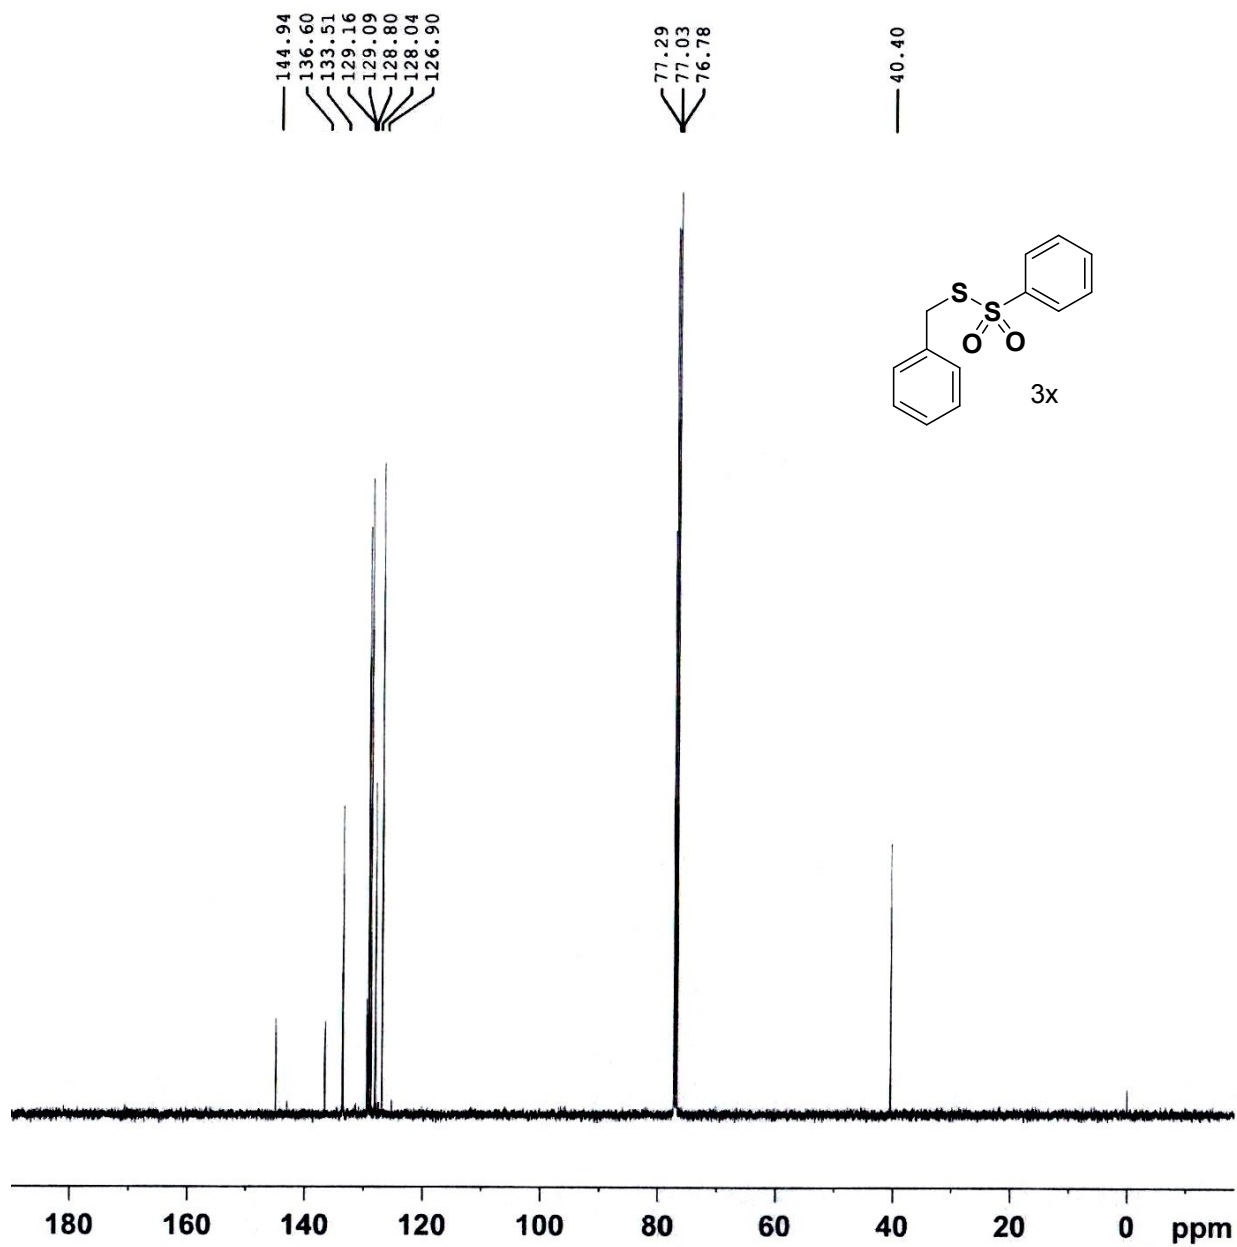

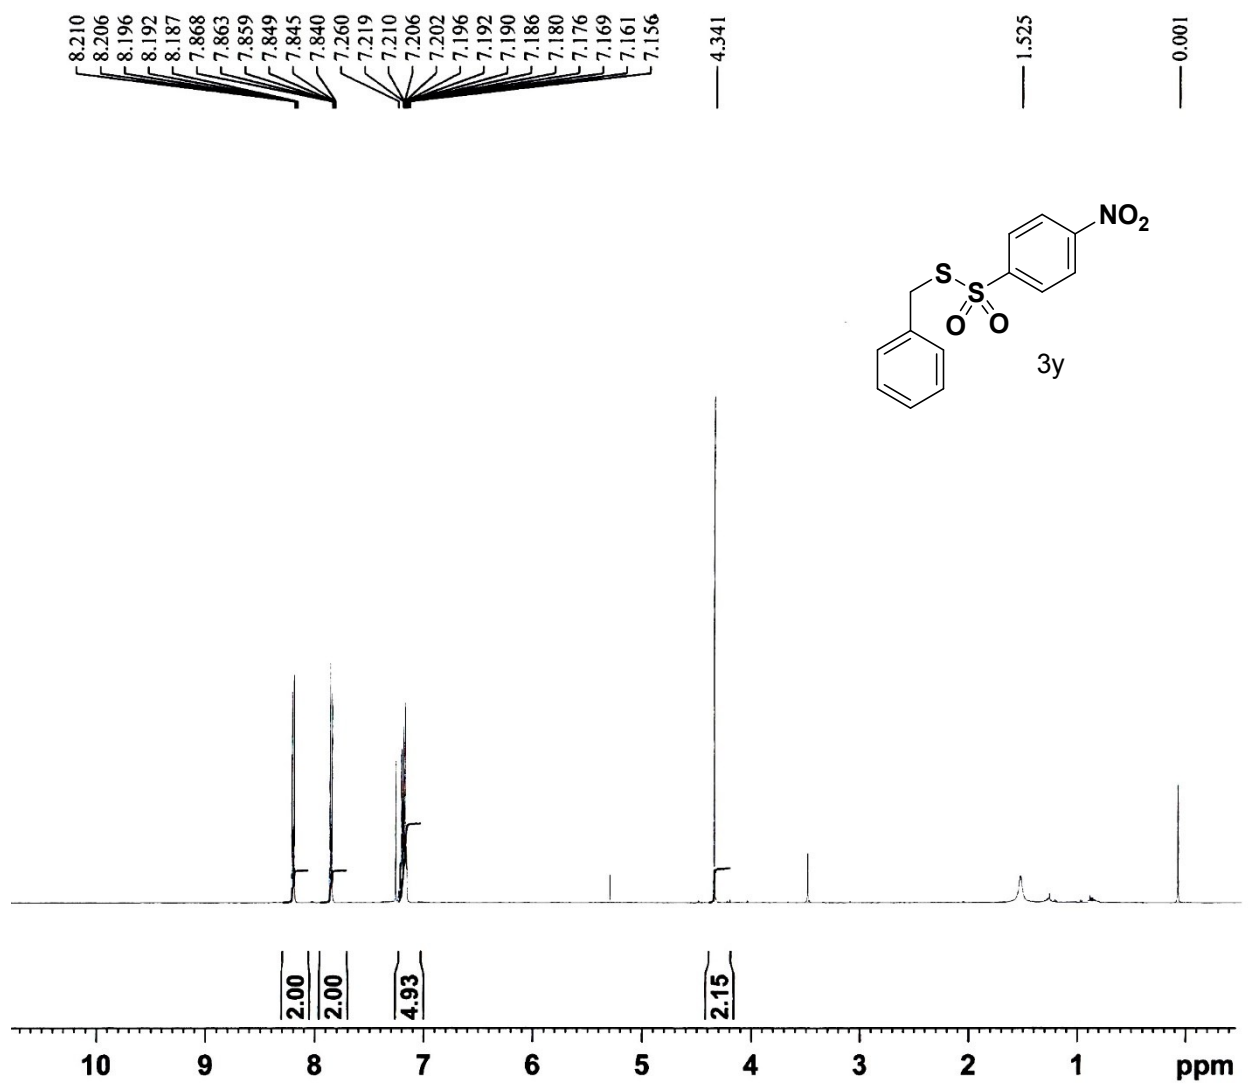

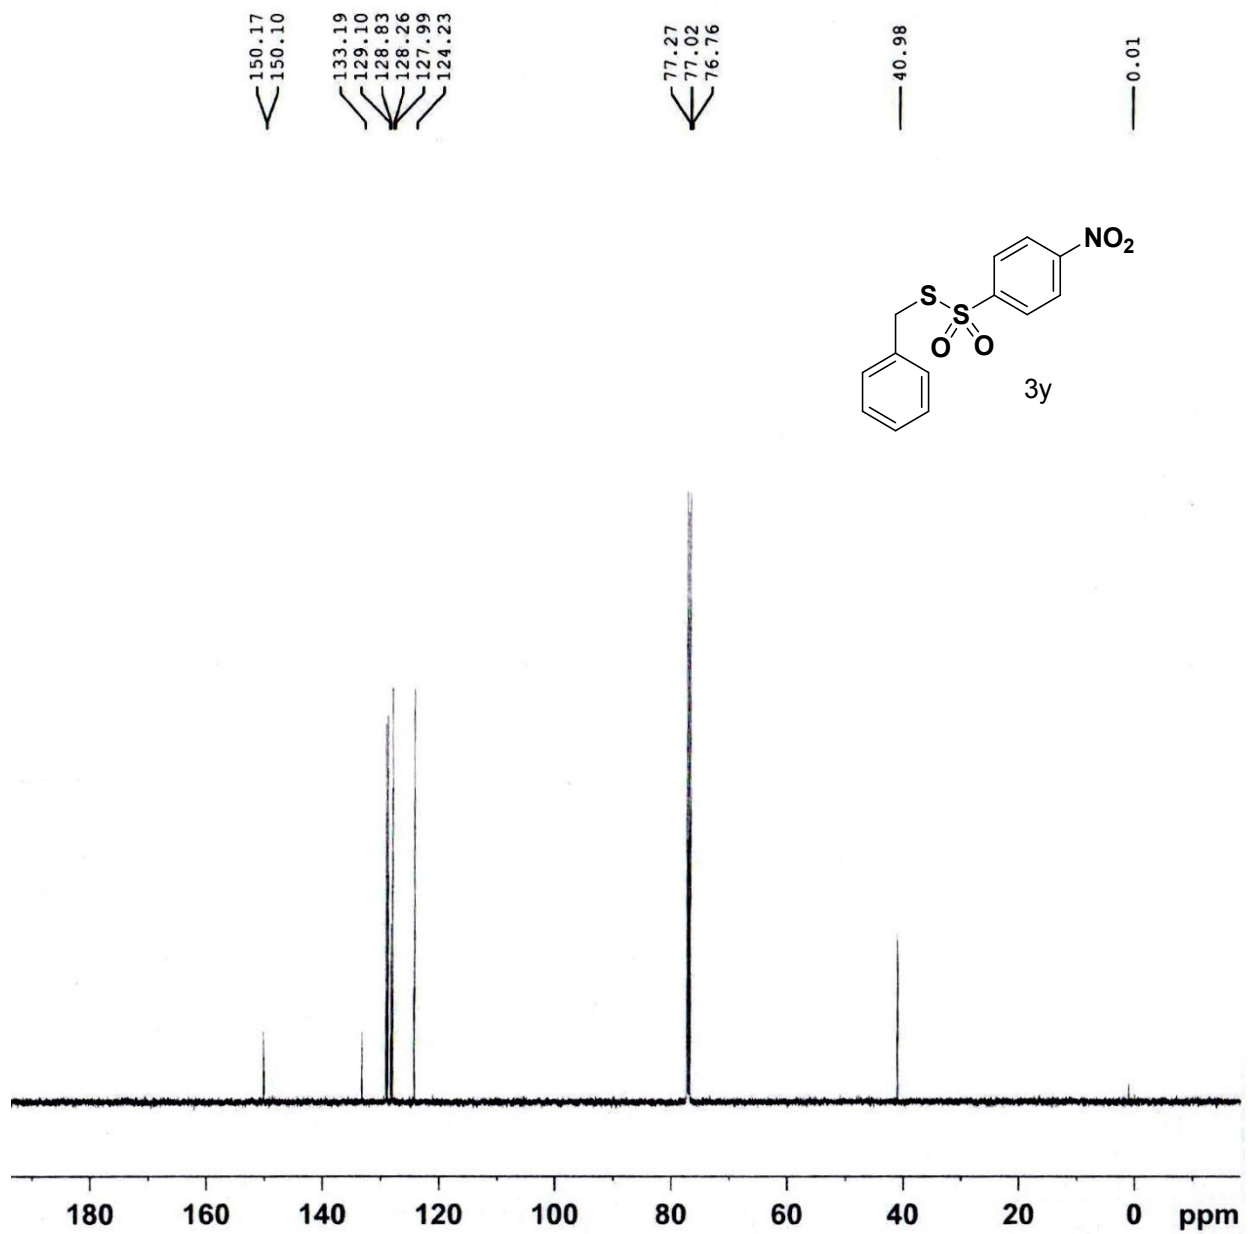

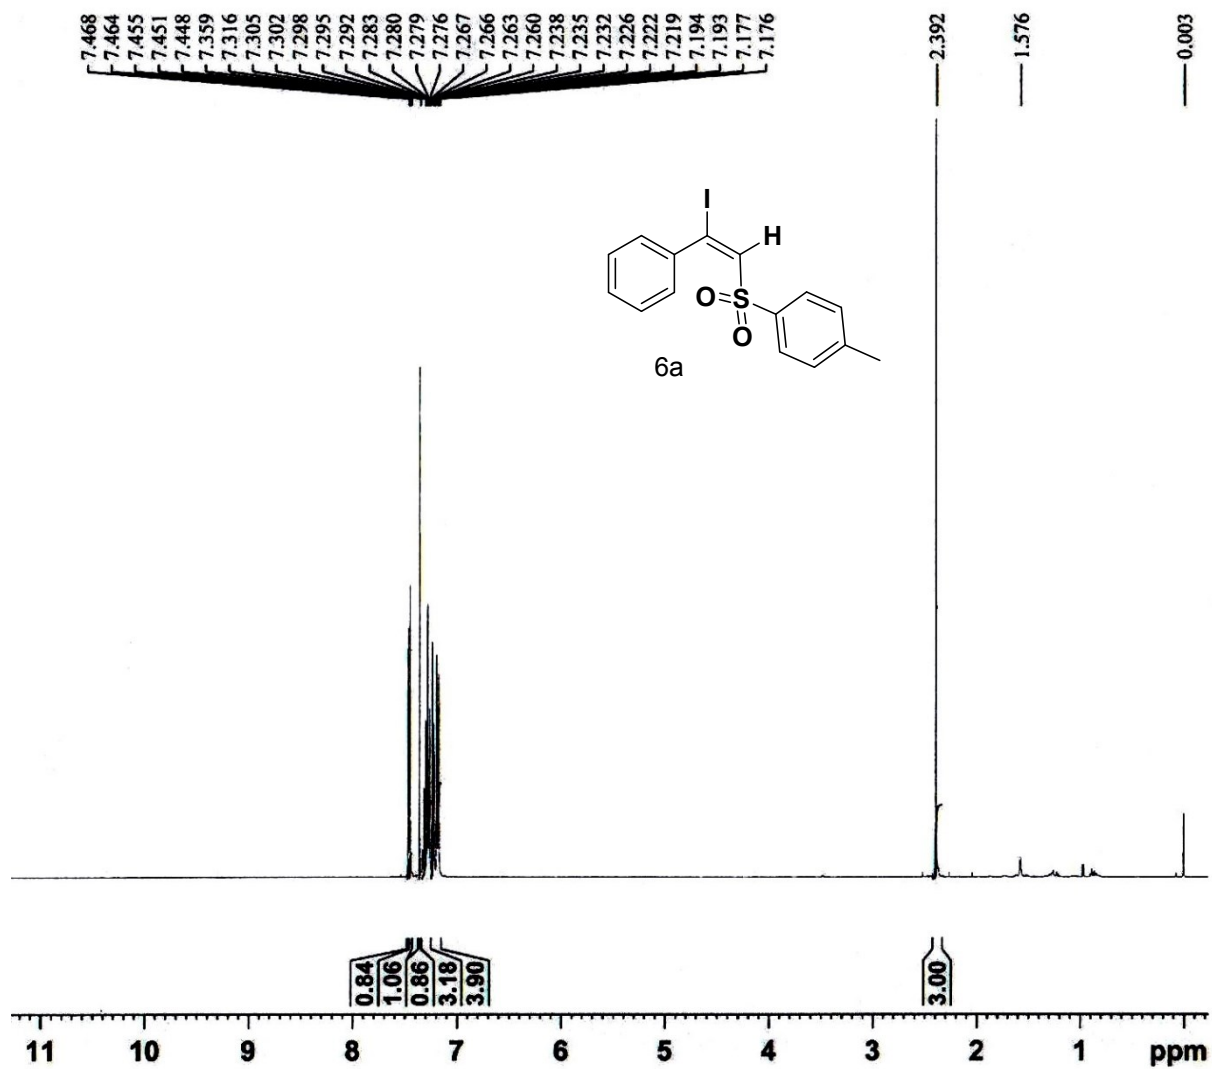

144.57  
141.30  
139.69  
137.38  
129.78  
129.67  
127.92  
127.89  
127.72  
114.15

77.29  
77.04  
76.78

21.62

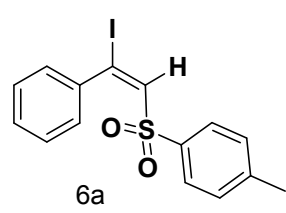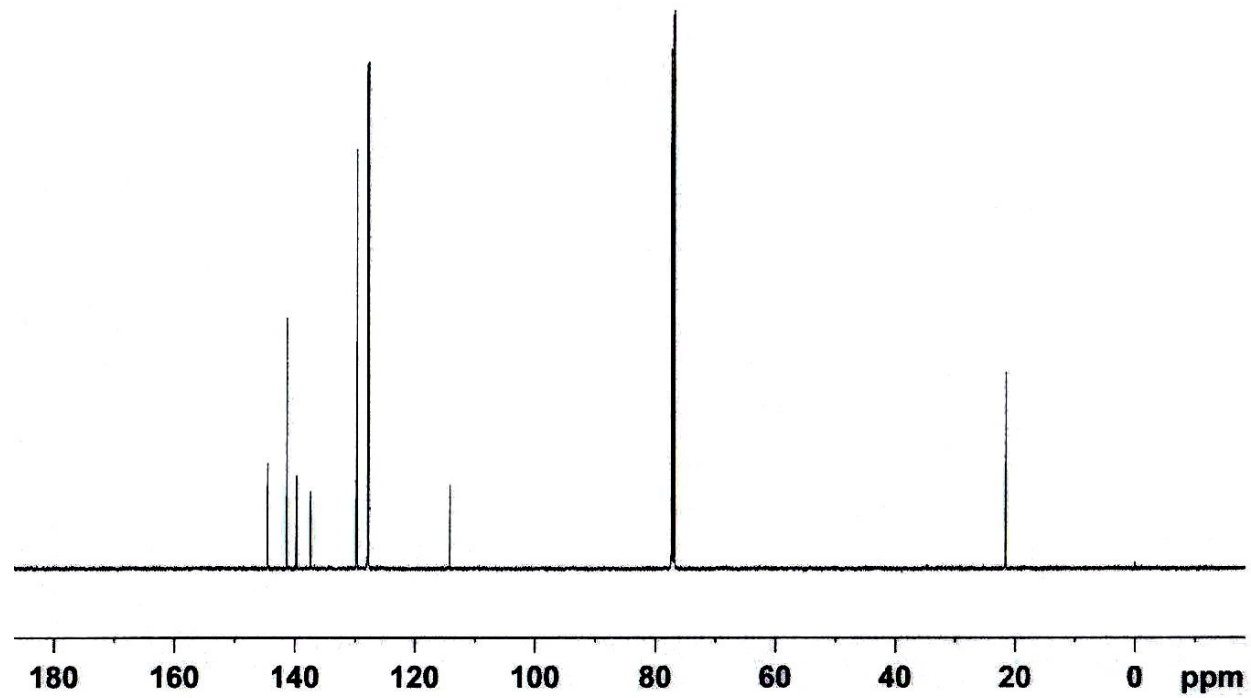

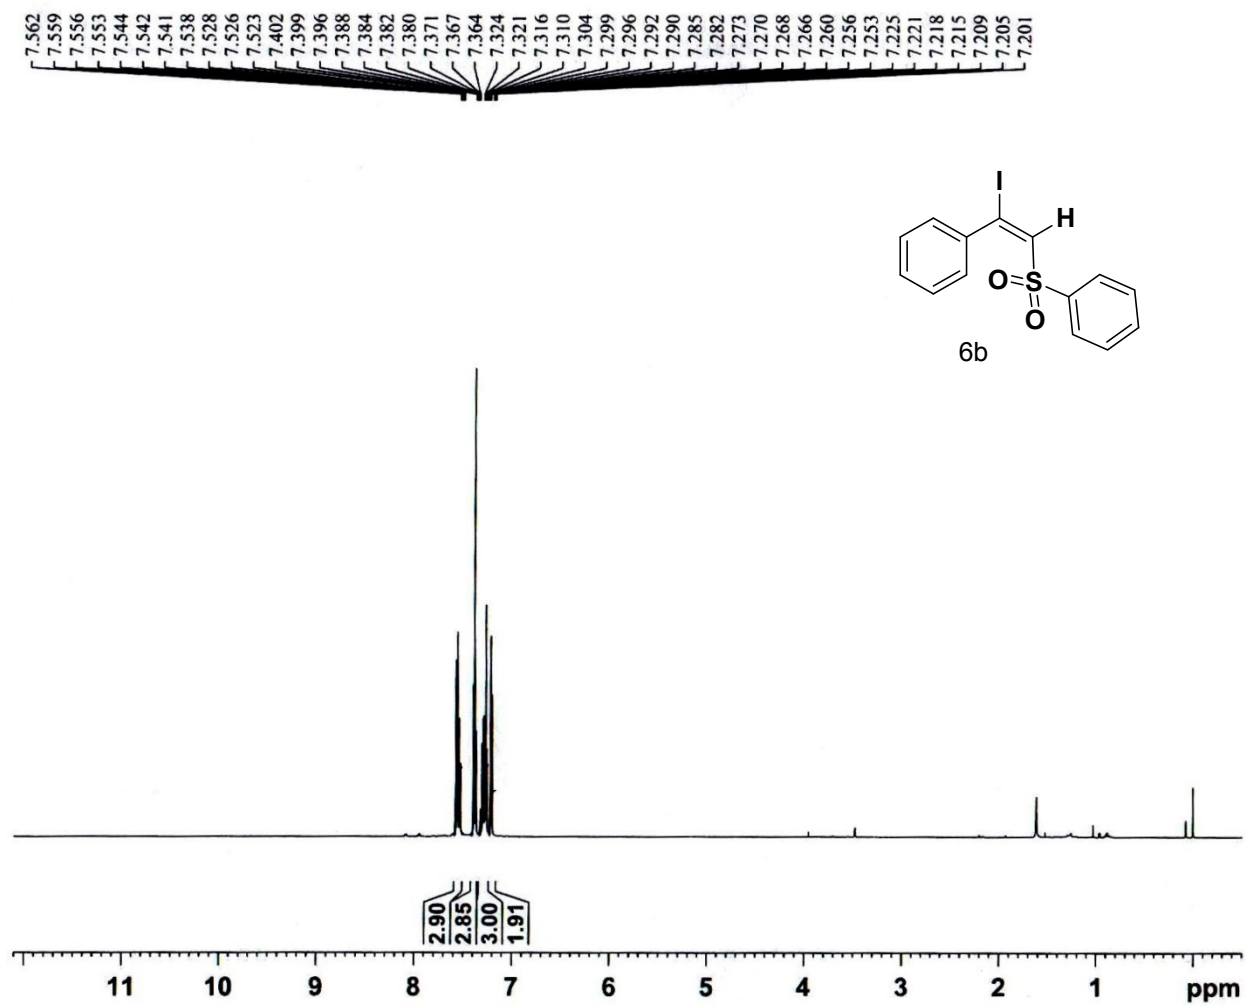

141.13  
140.25  
139.60  
133.51  
129.86  
129.04  
128.00  
127.83  
127.69  
— 114.77

77.32  
77.07  
76.82

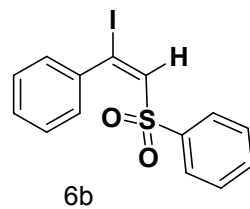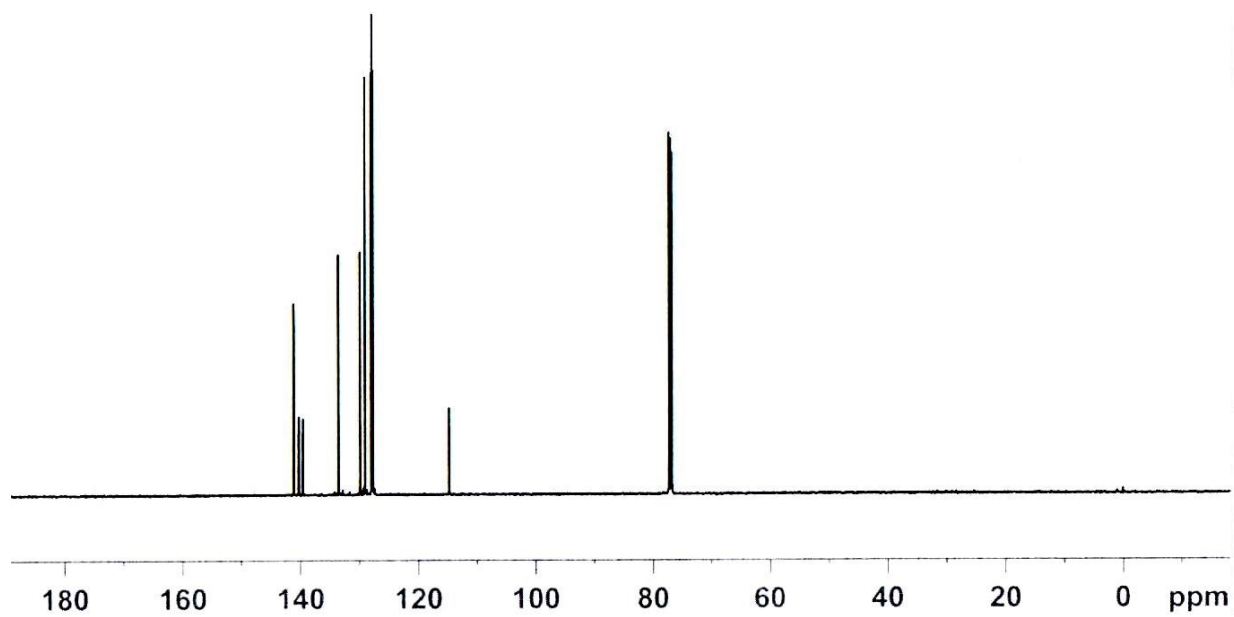

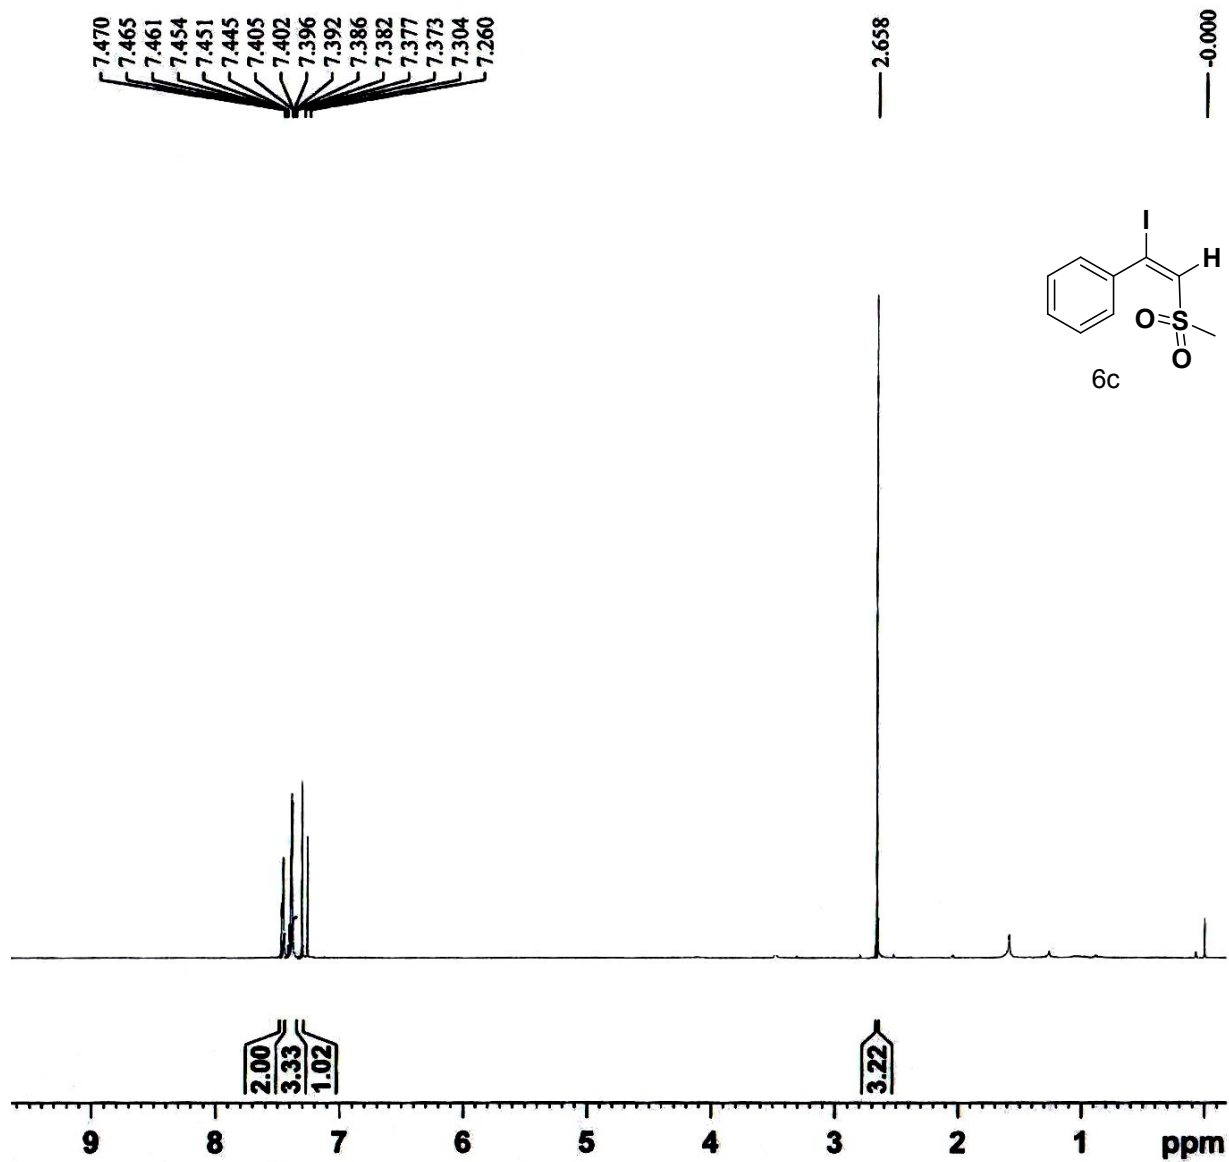



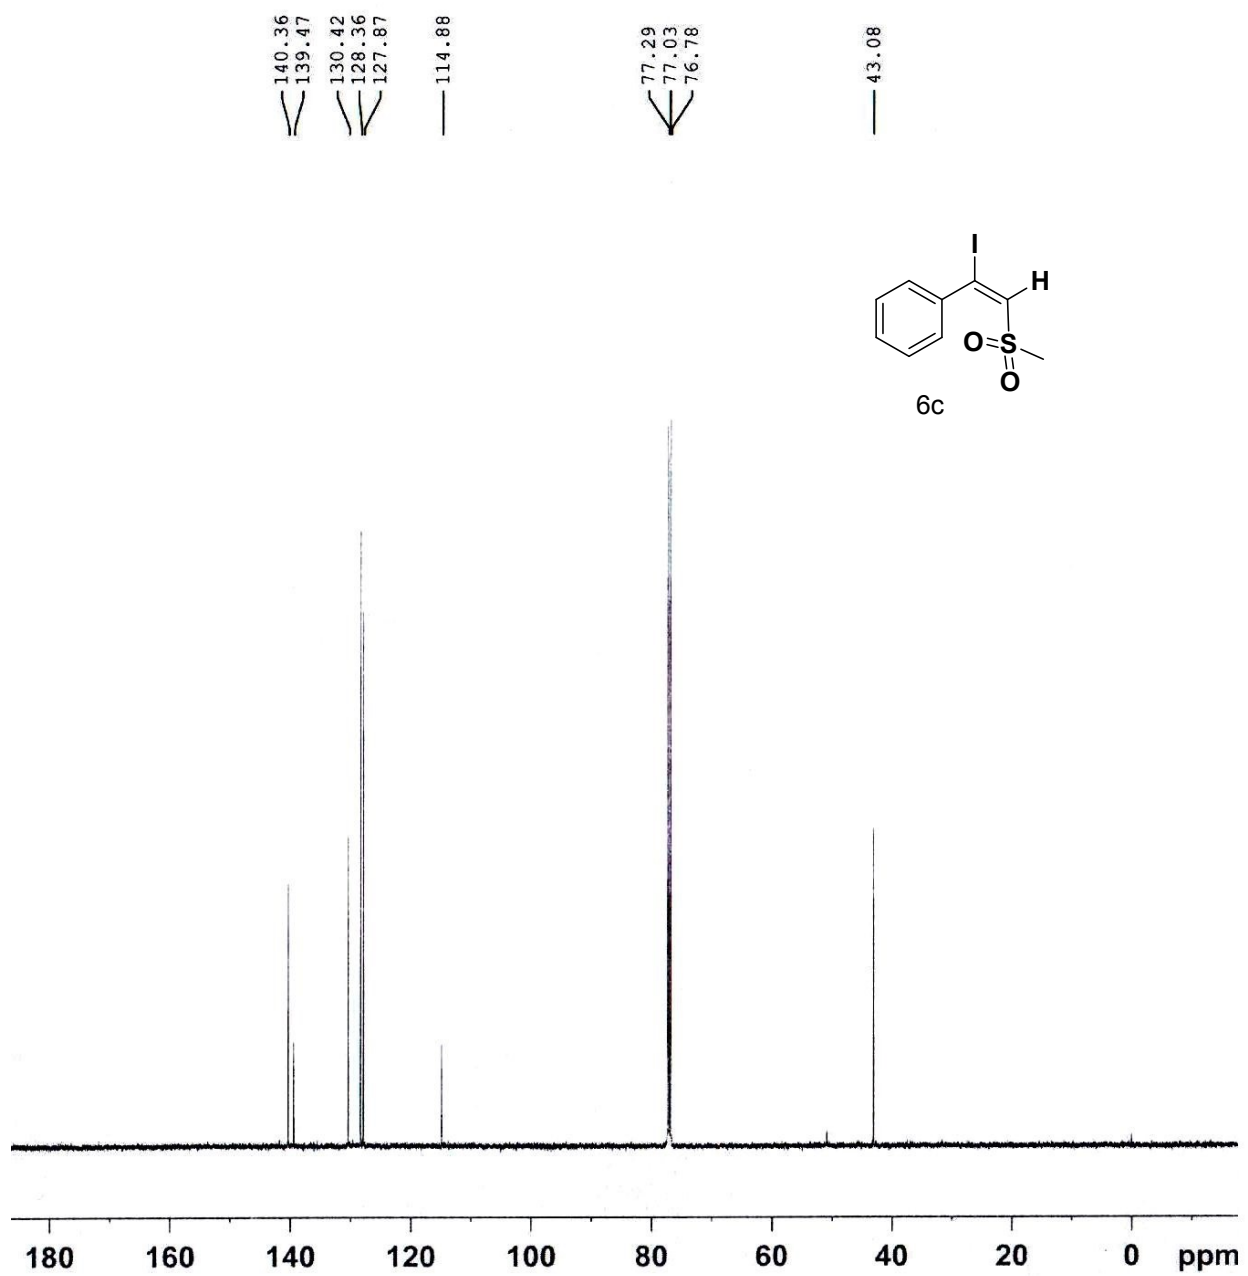

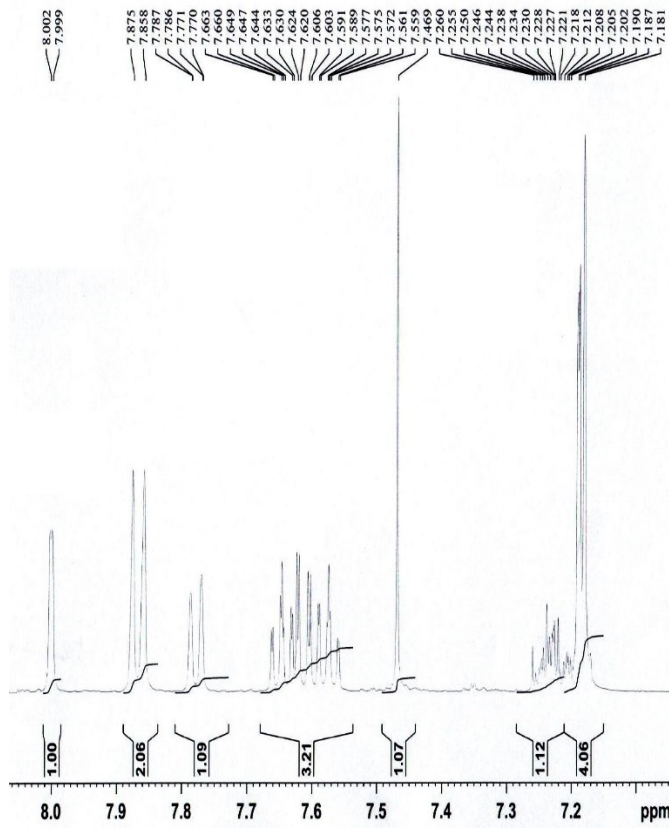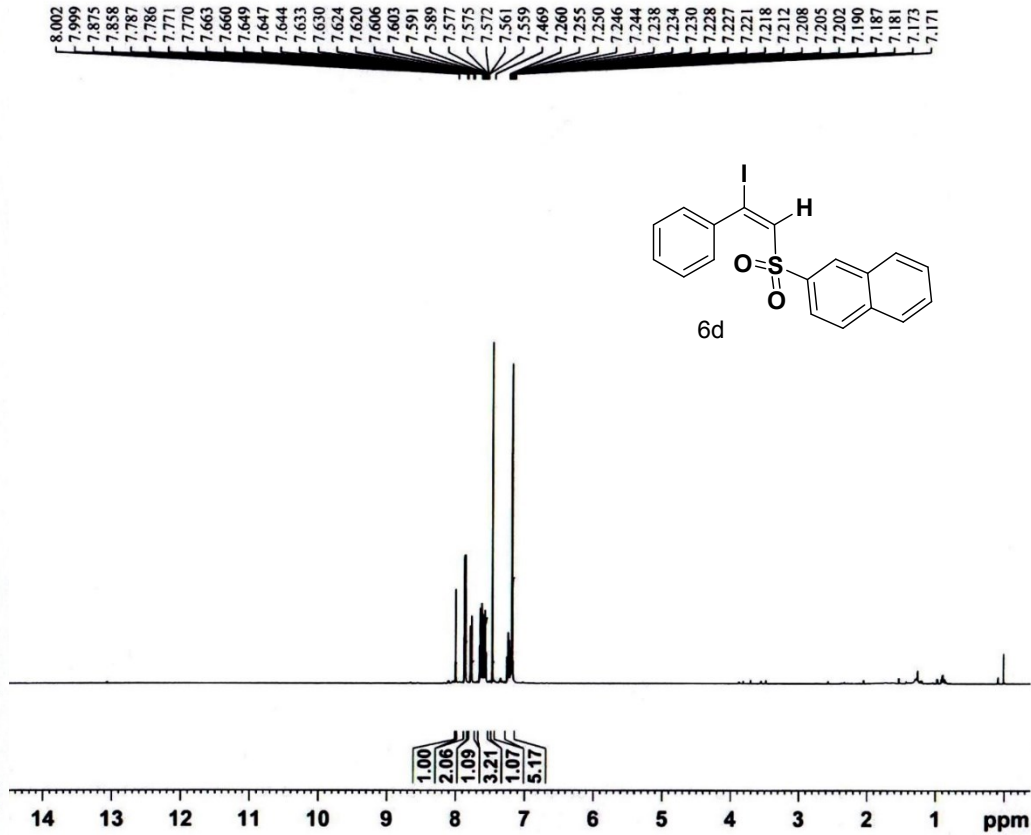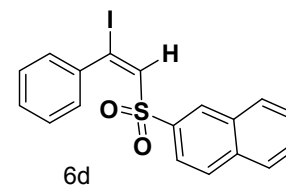

141.27  
139.48  
136.82  
135.10  
131.95  
130.02  
129.92  
129.41  
129.36  
129.40  
127.90  
127.66  
127.60  
122.41  
114.91

77.36  
77.11  
76.85

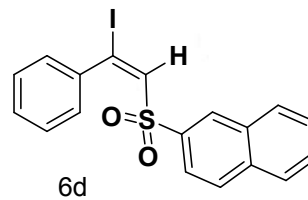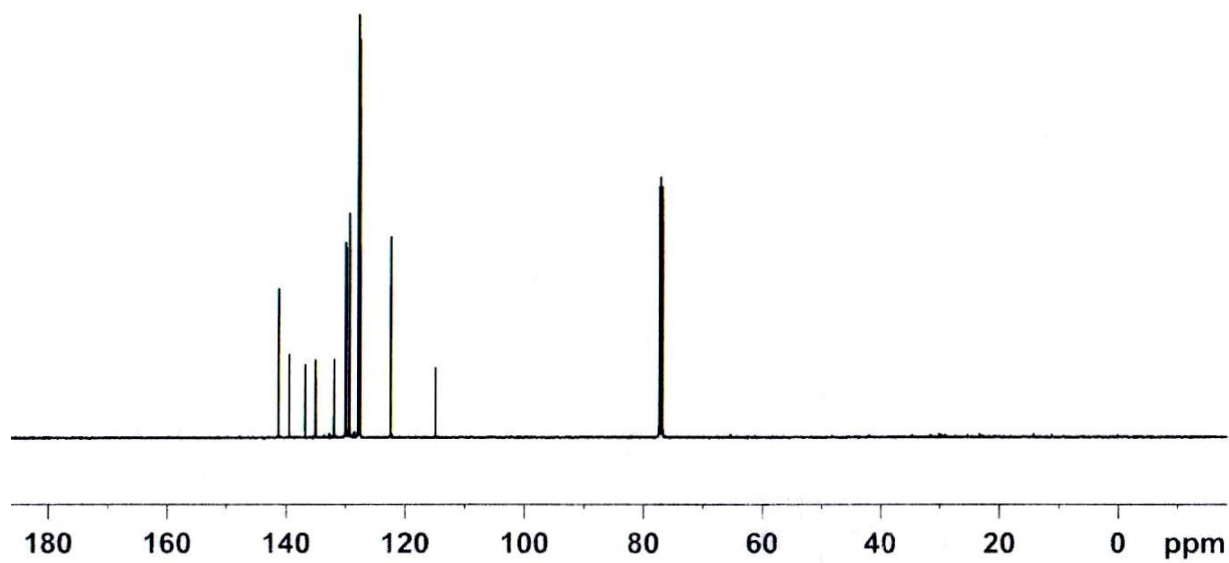

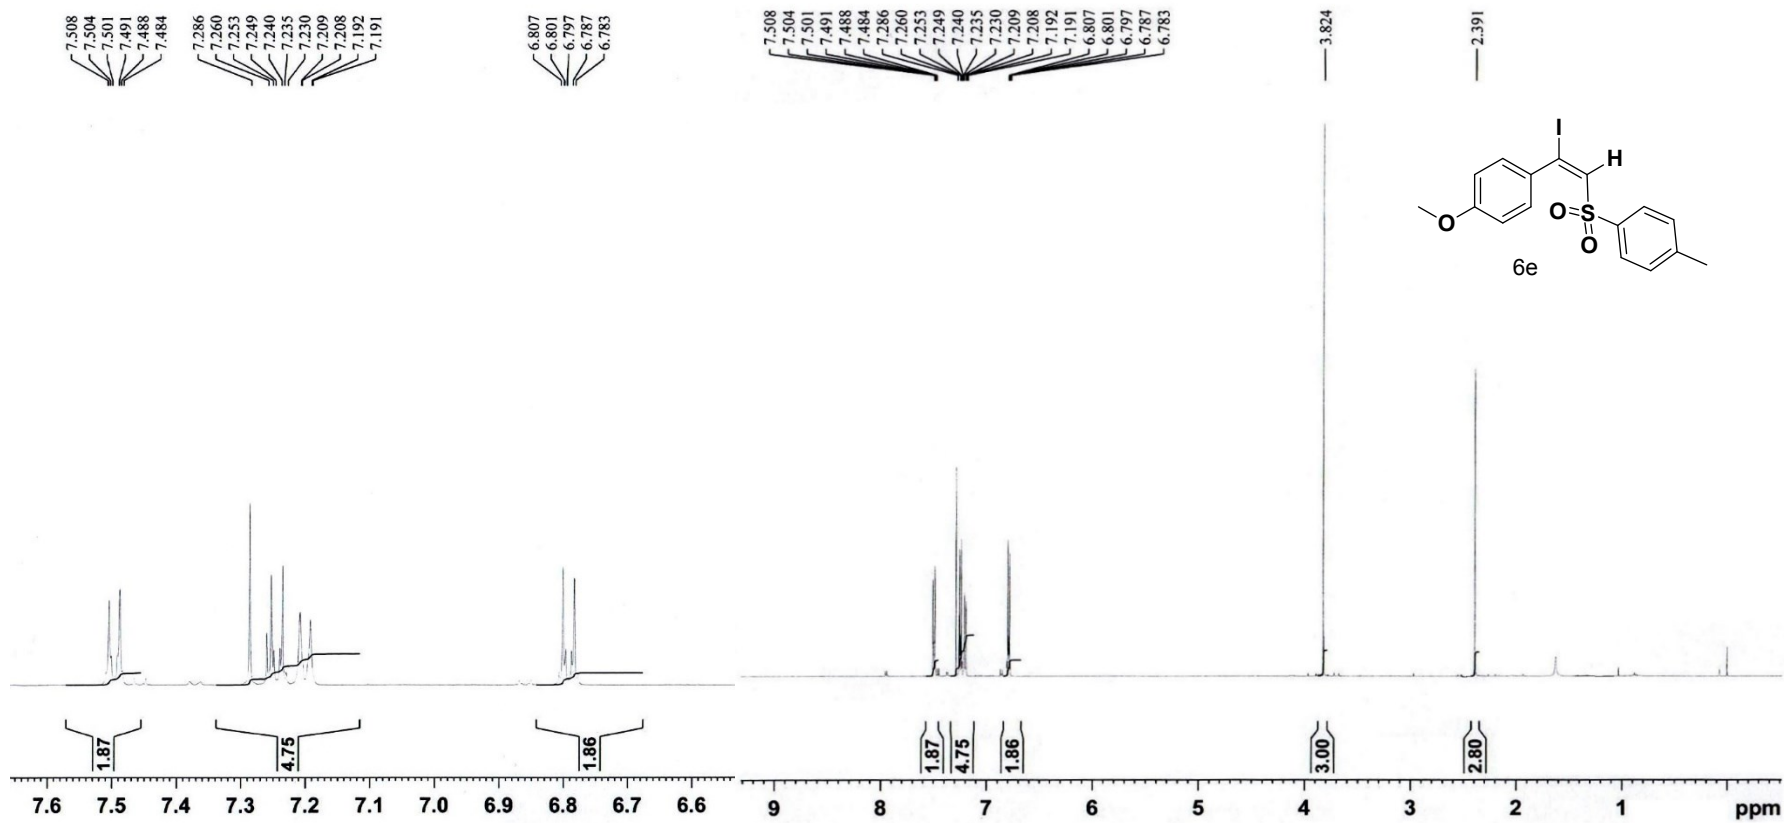

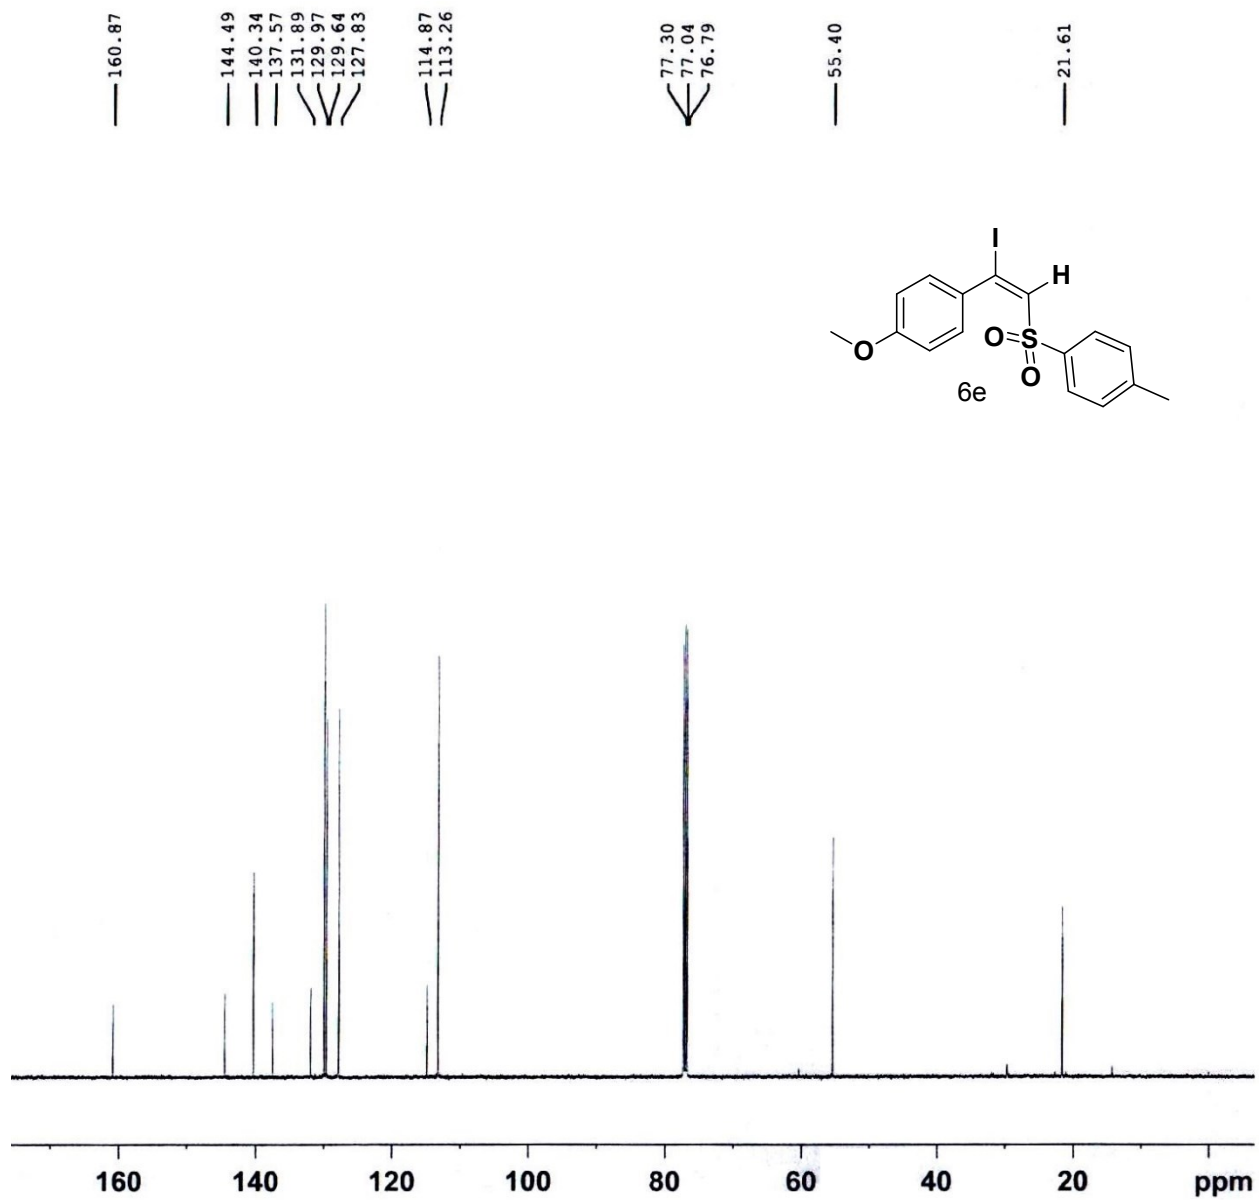

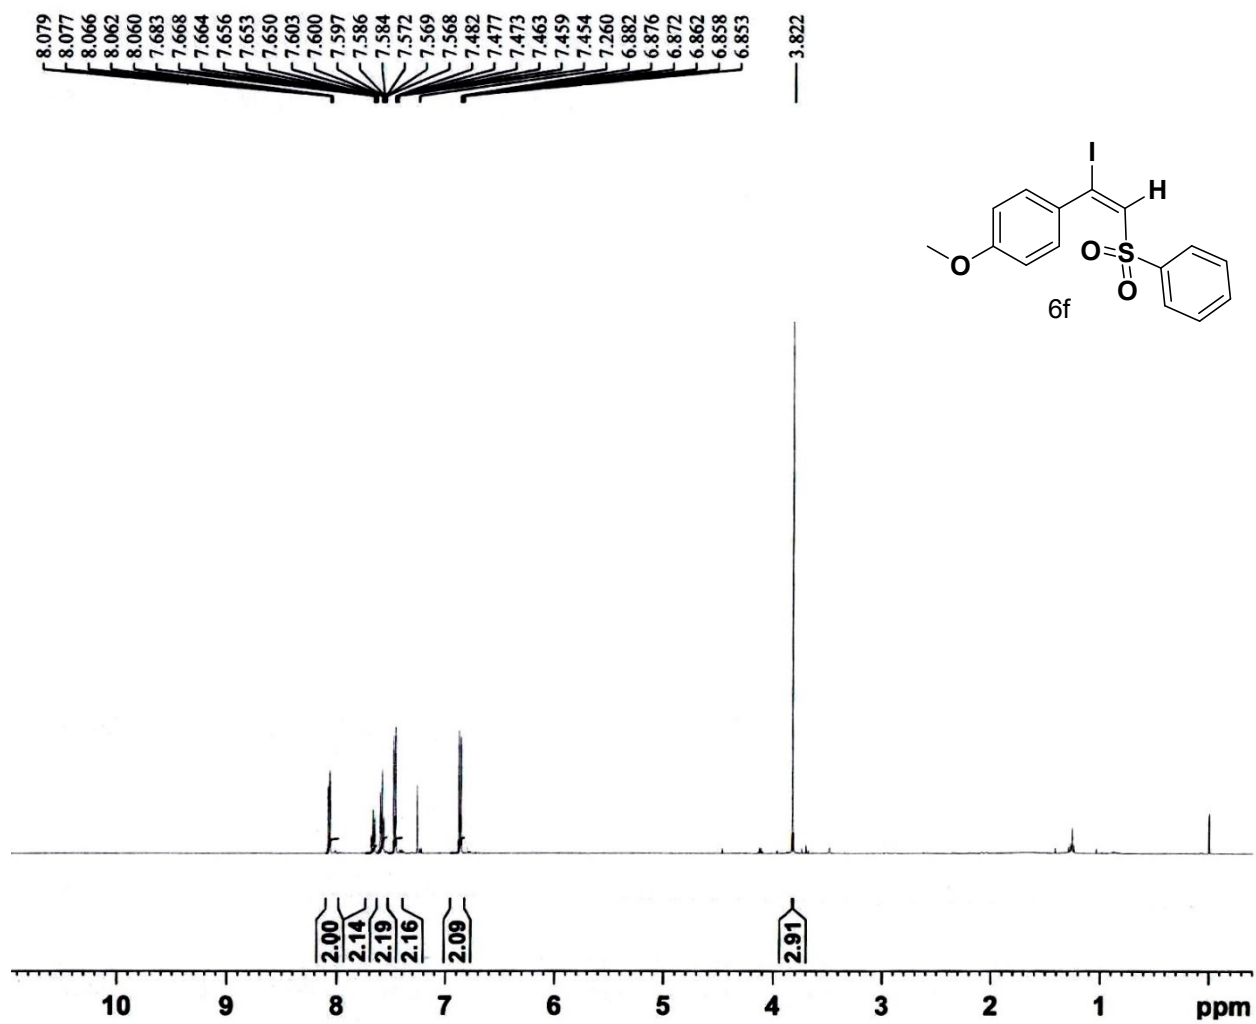

— 162.32  
— 142.18  
— 134.72  
— 133.95  
— 129.31  
— 127.28  
— 114.46  
— 109.54  
— 94.70  
— 84.65  
— 77.28  
— 77.03  
— 76.77  
— 55.47

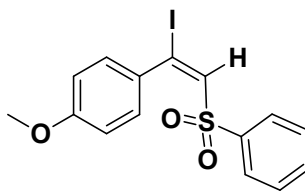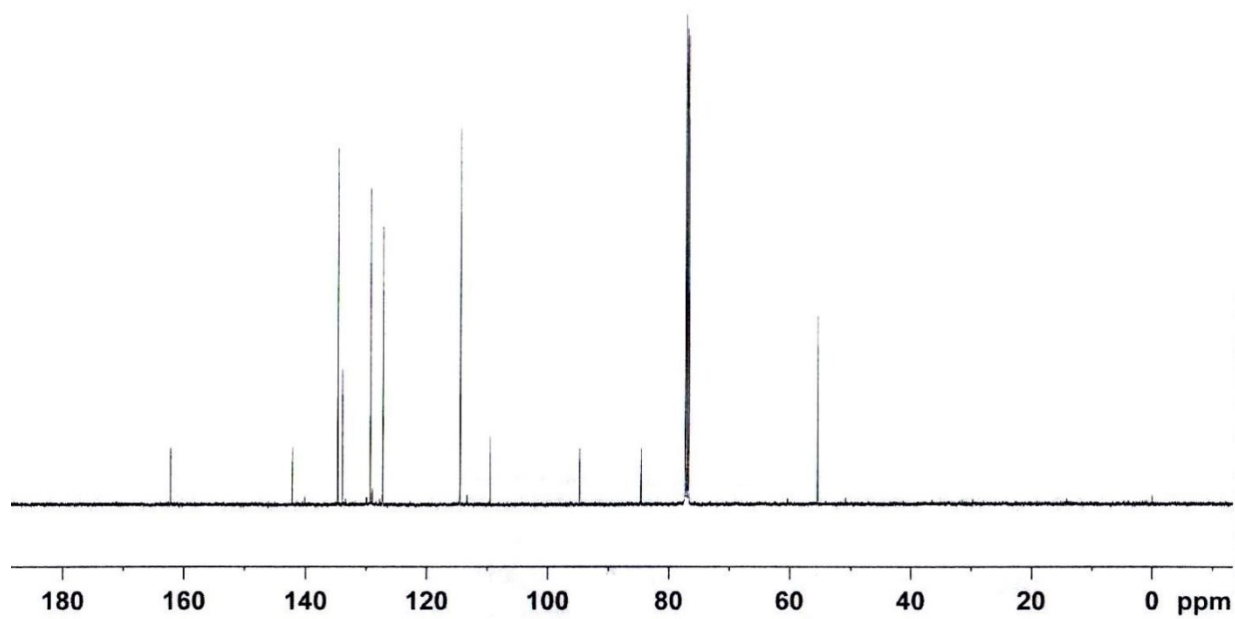

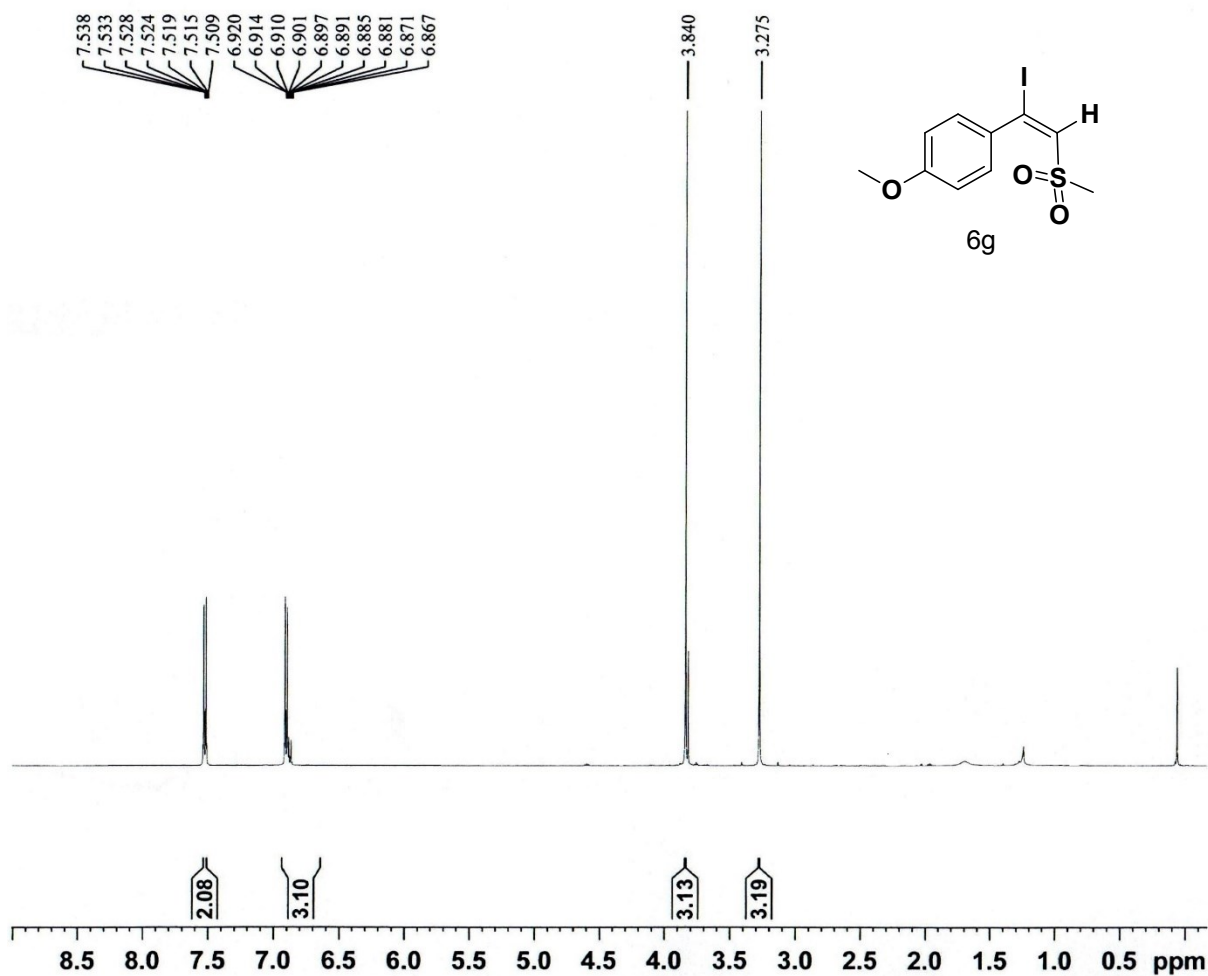



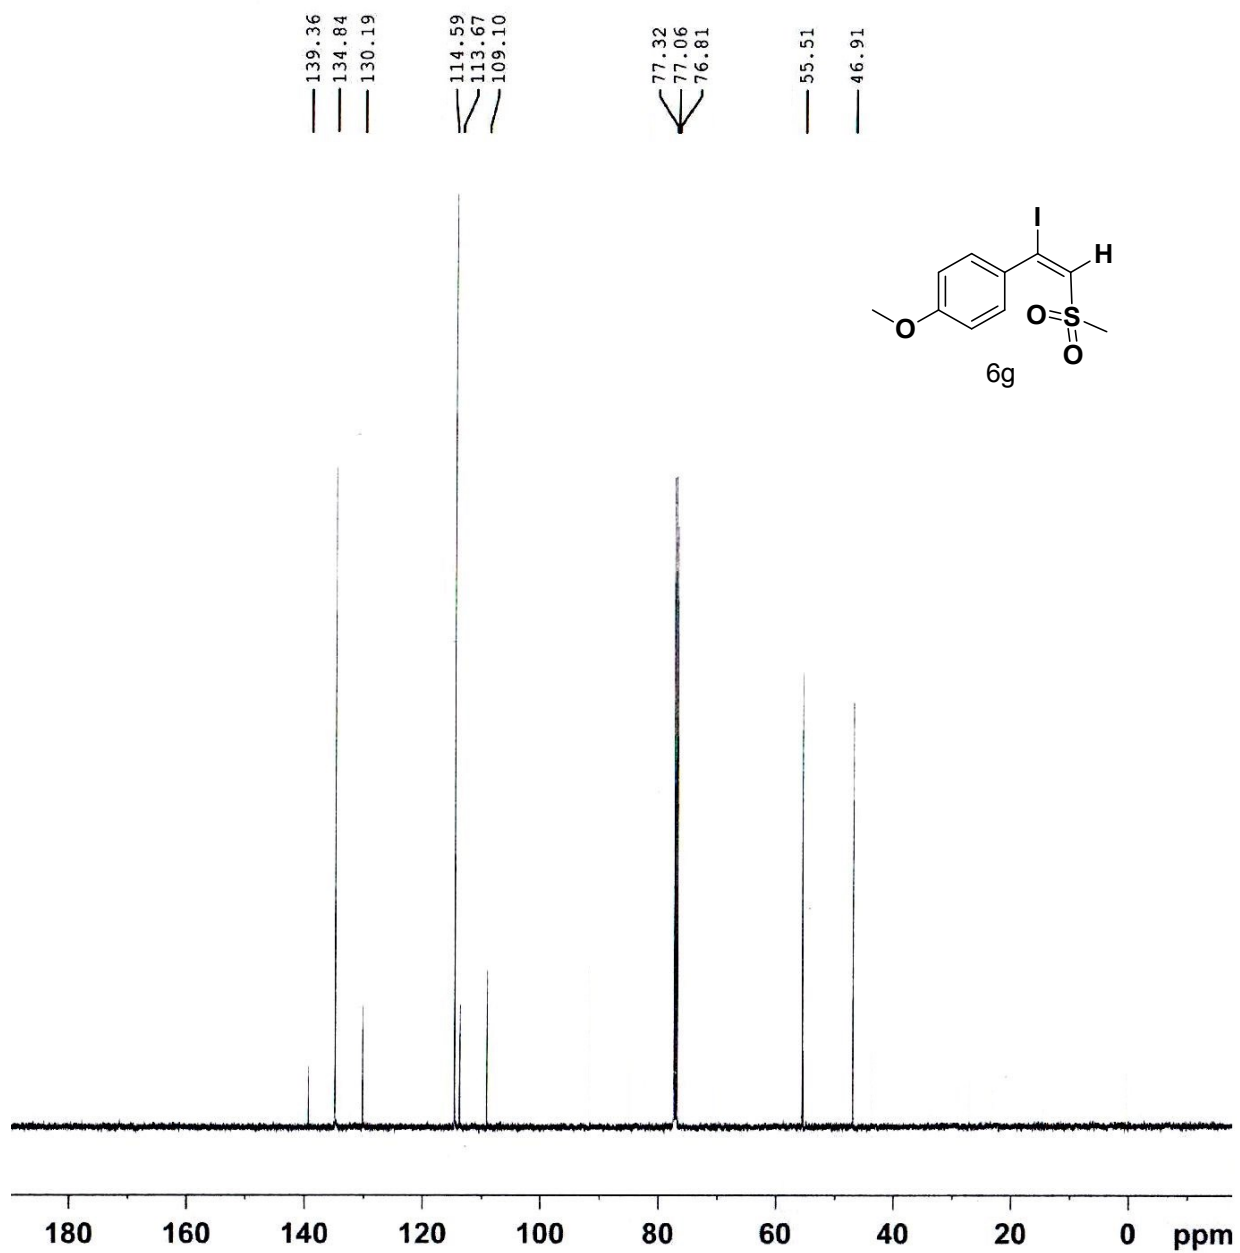

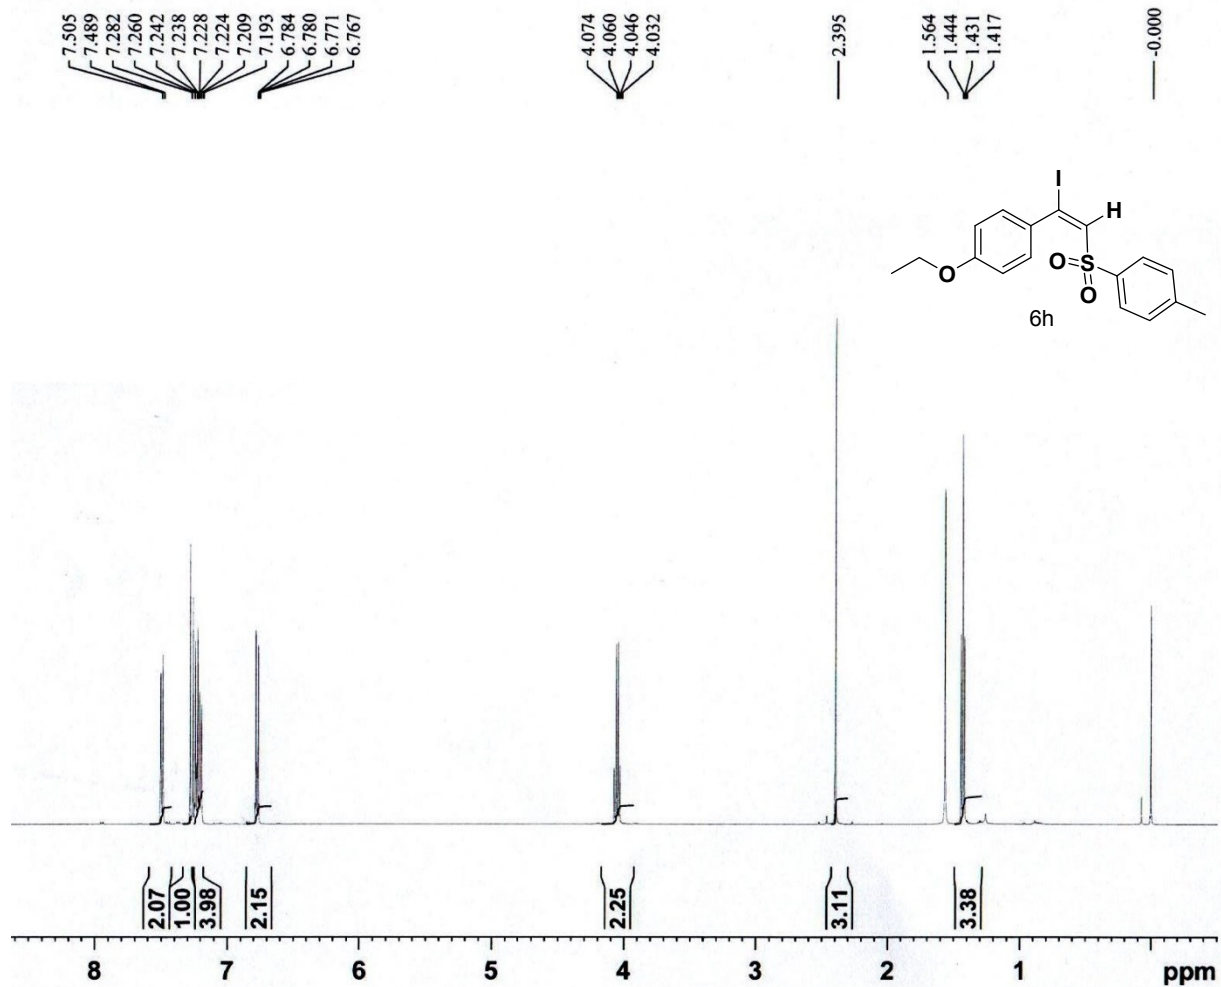

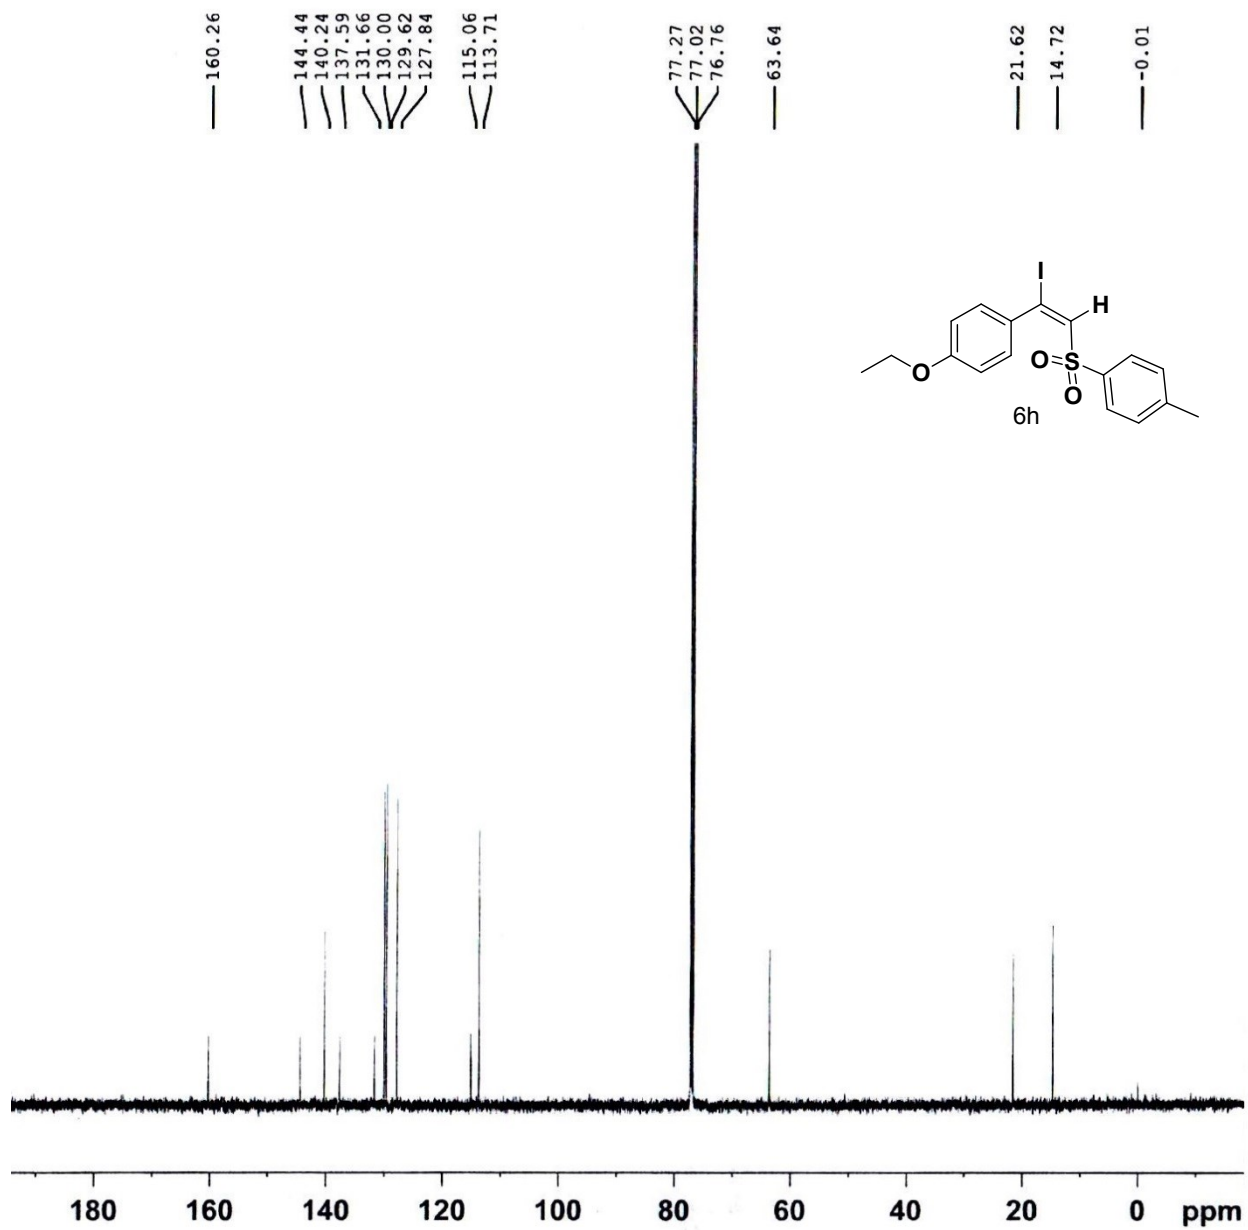

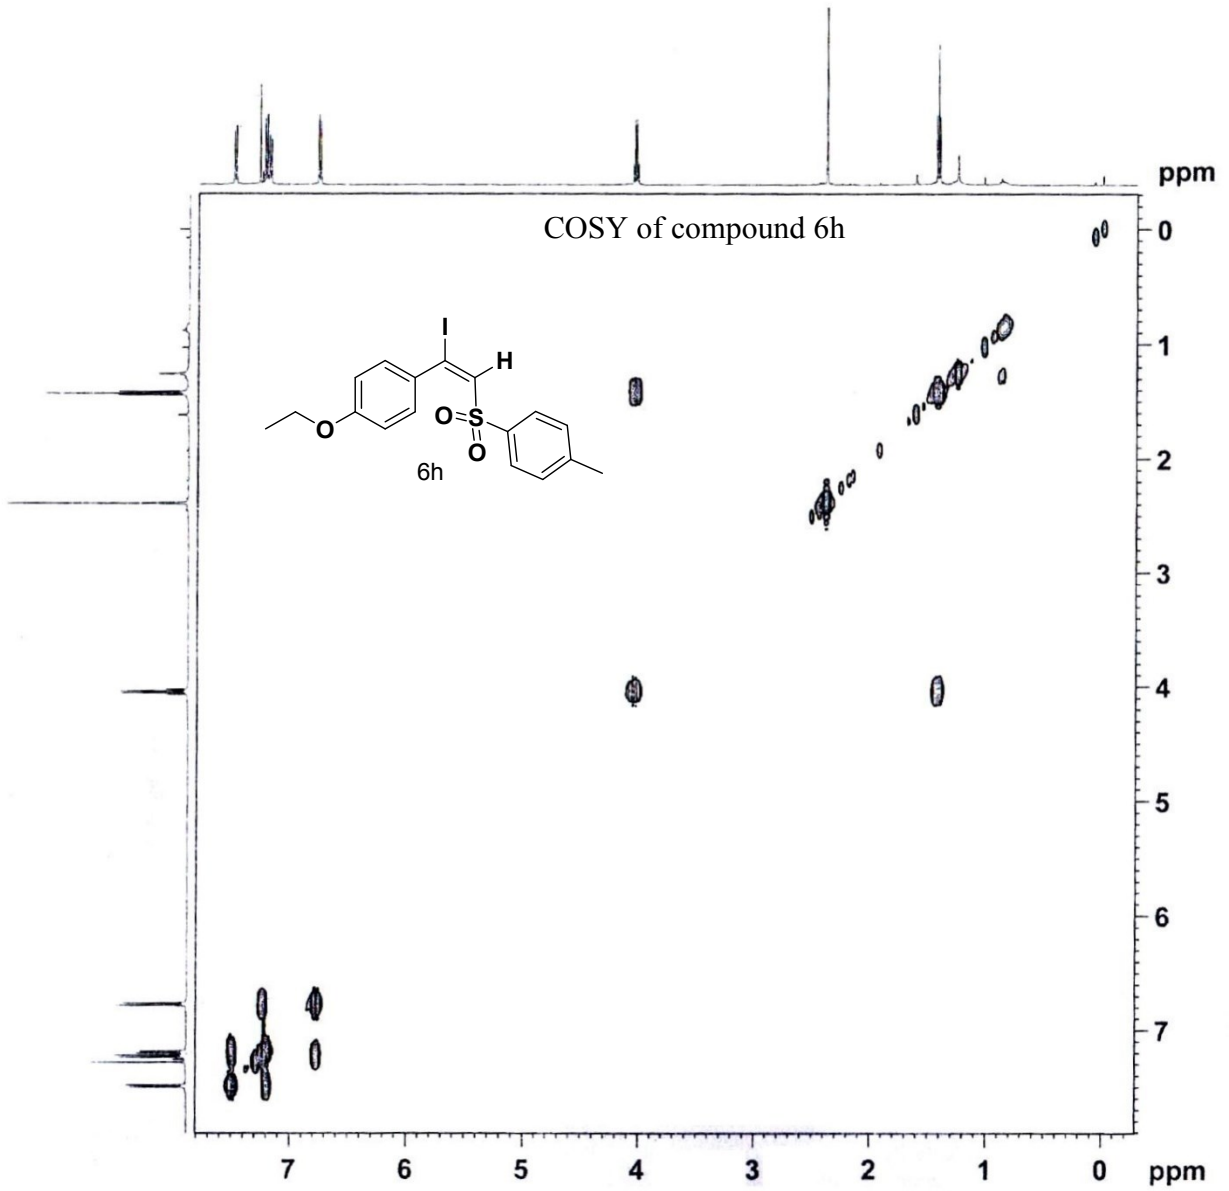

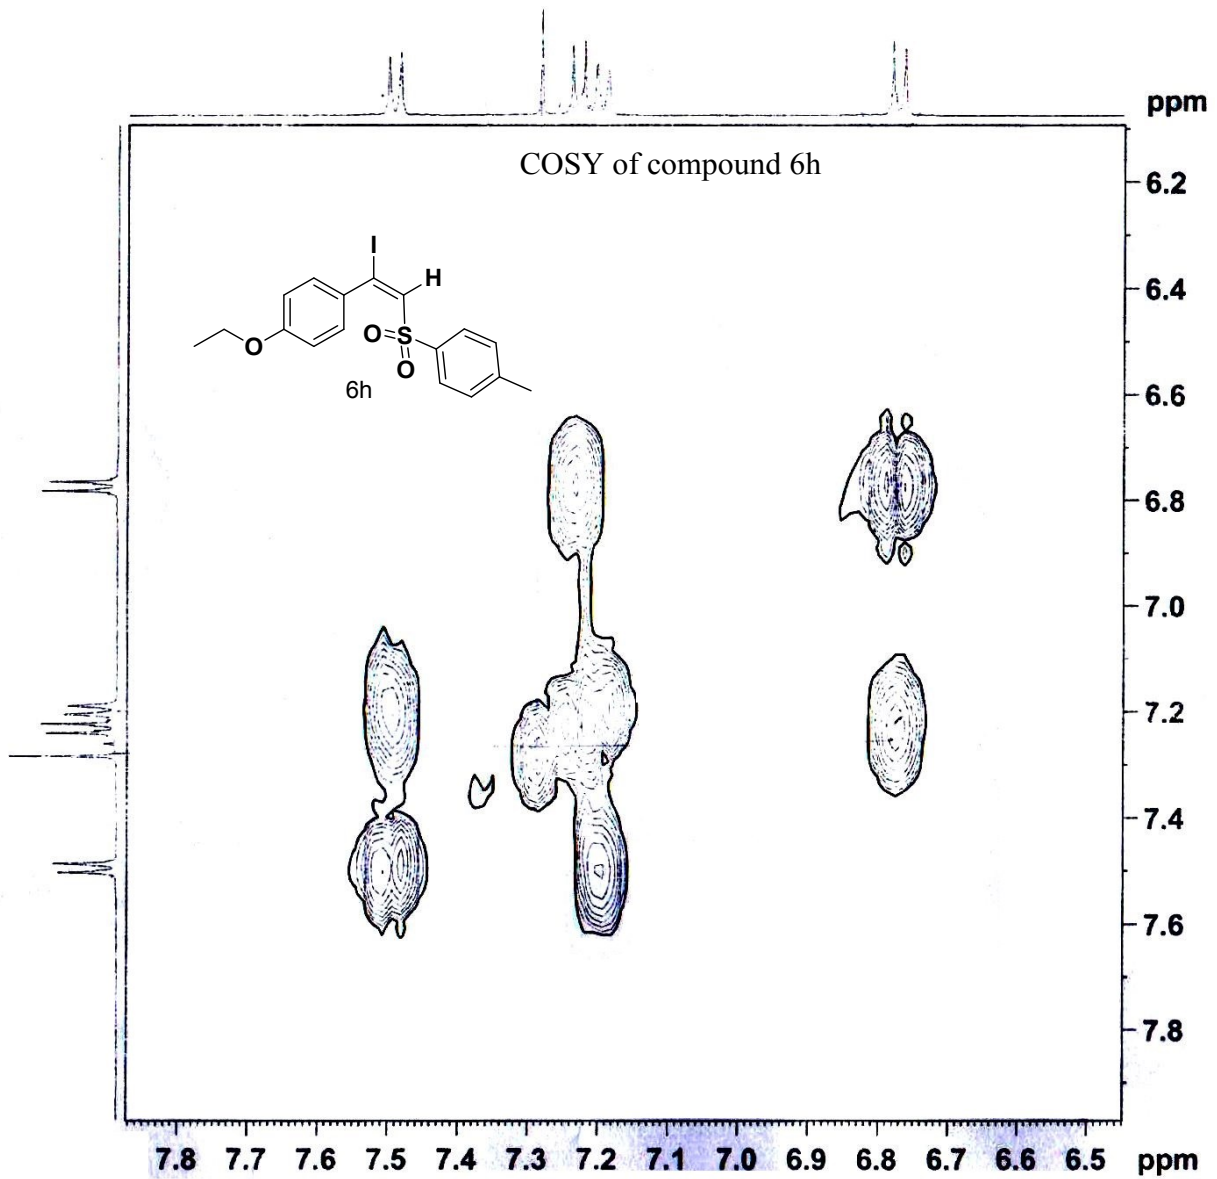

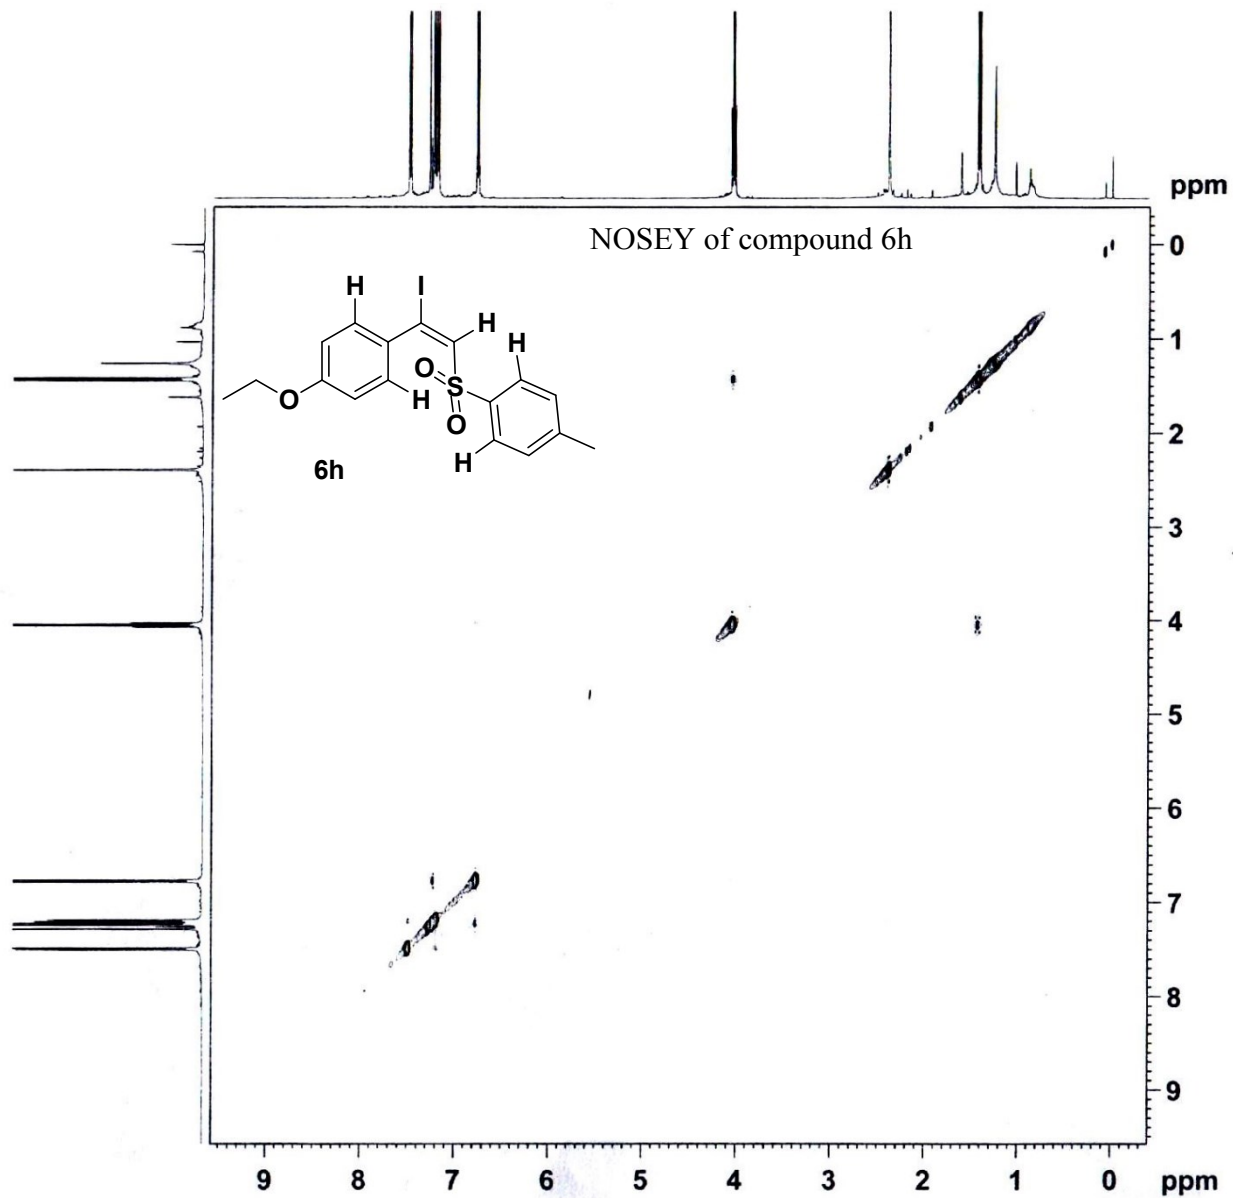

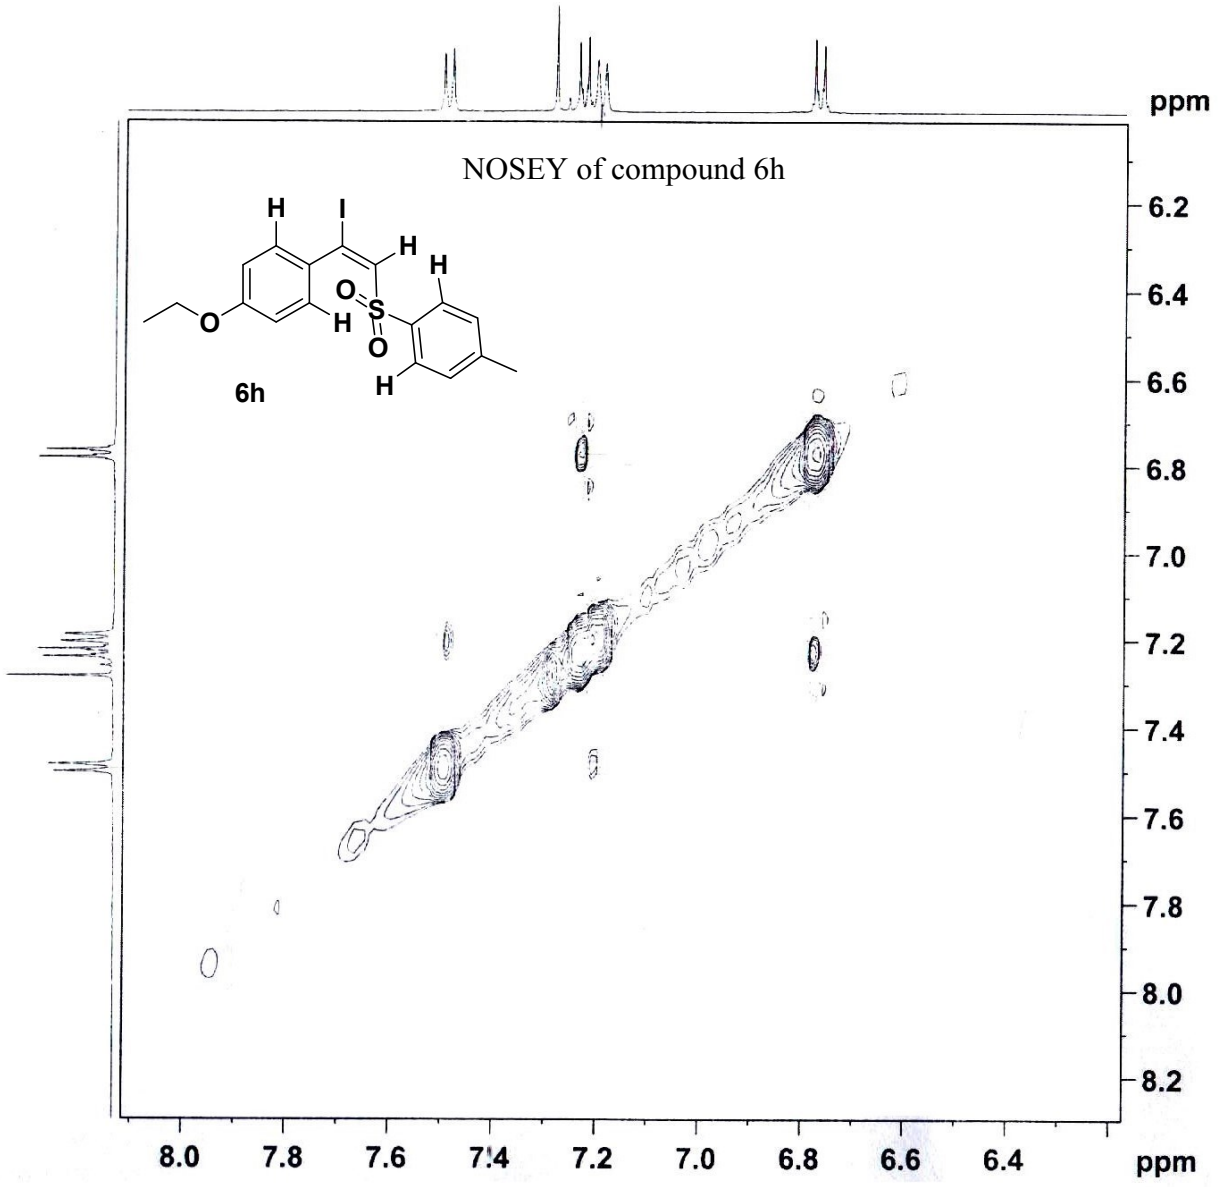

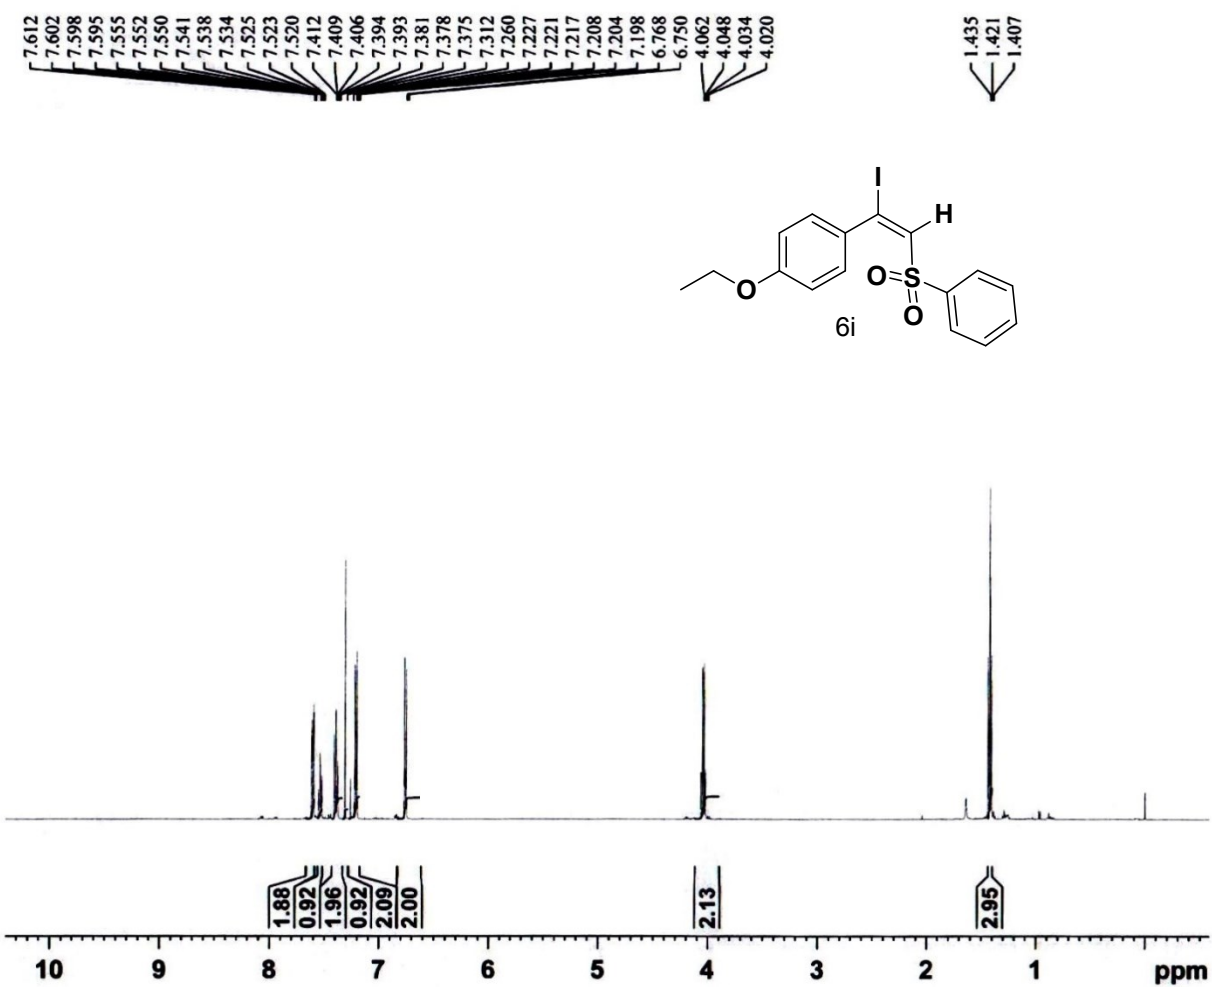



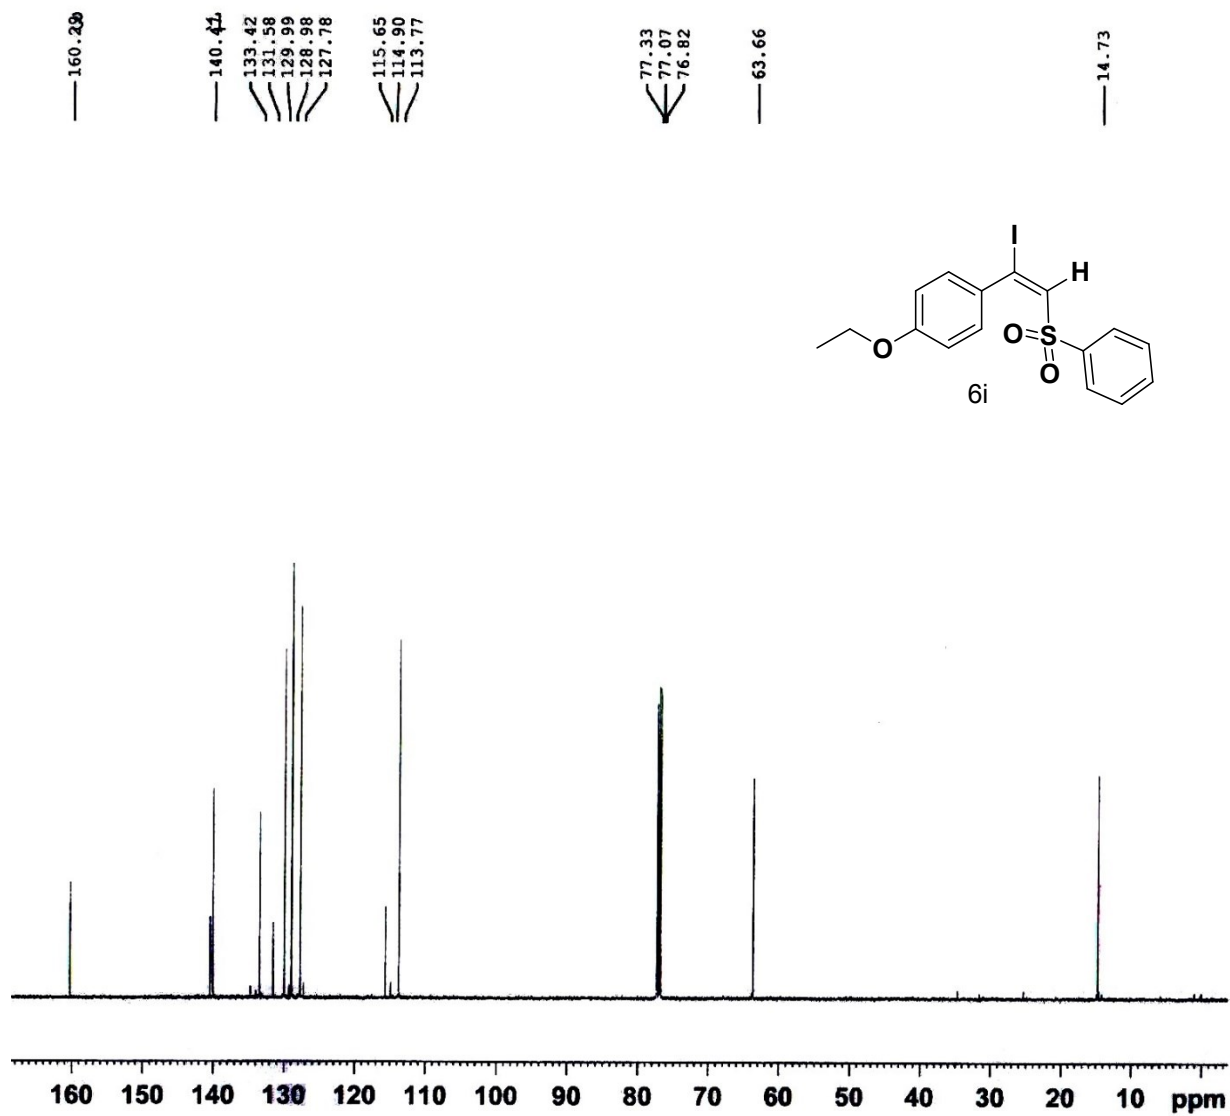

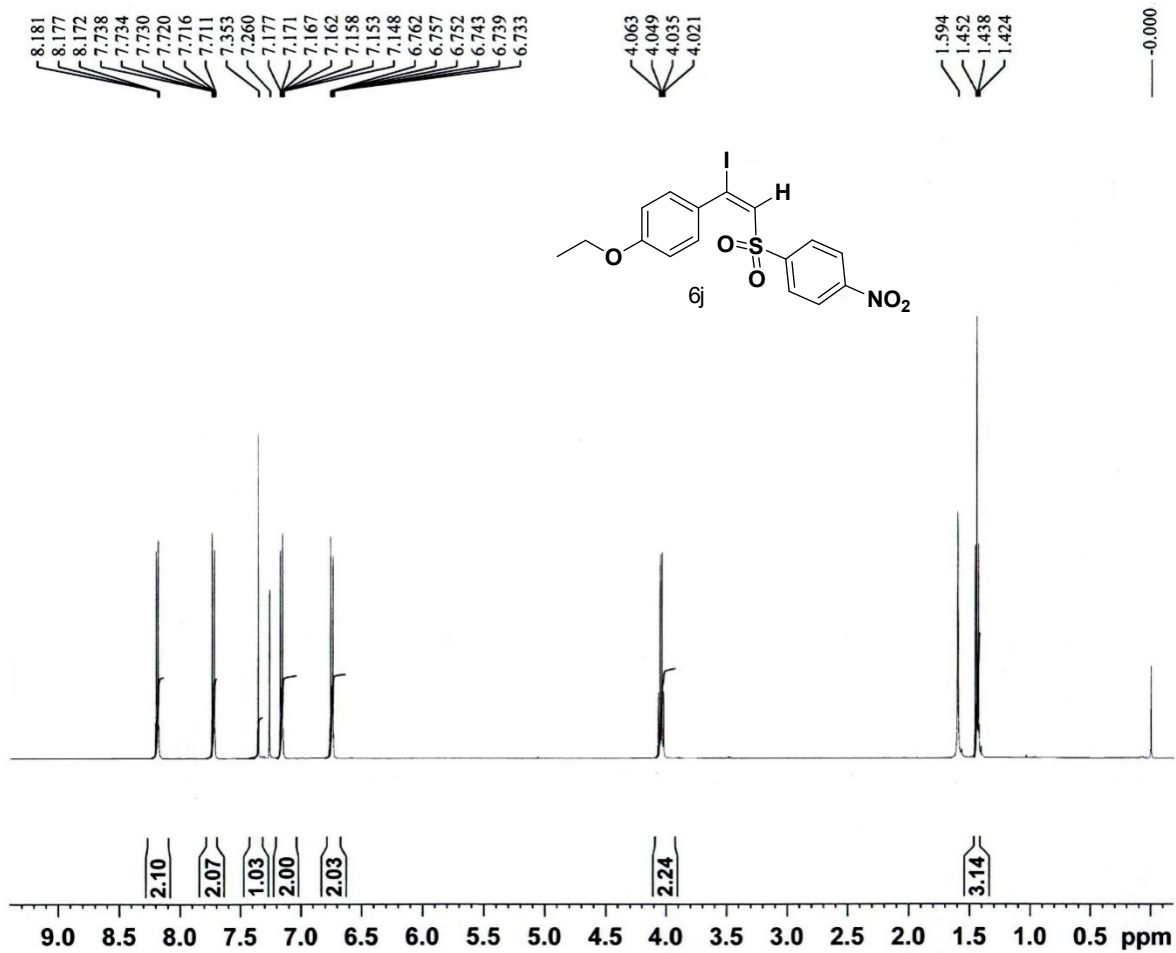

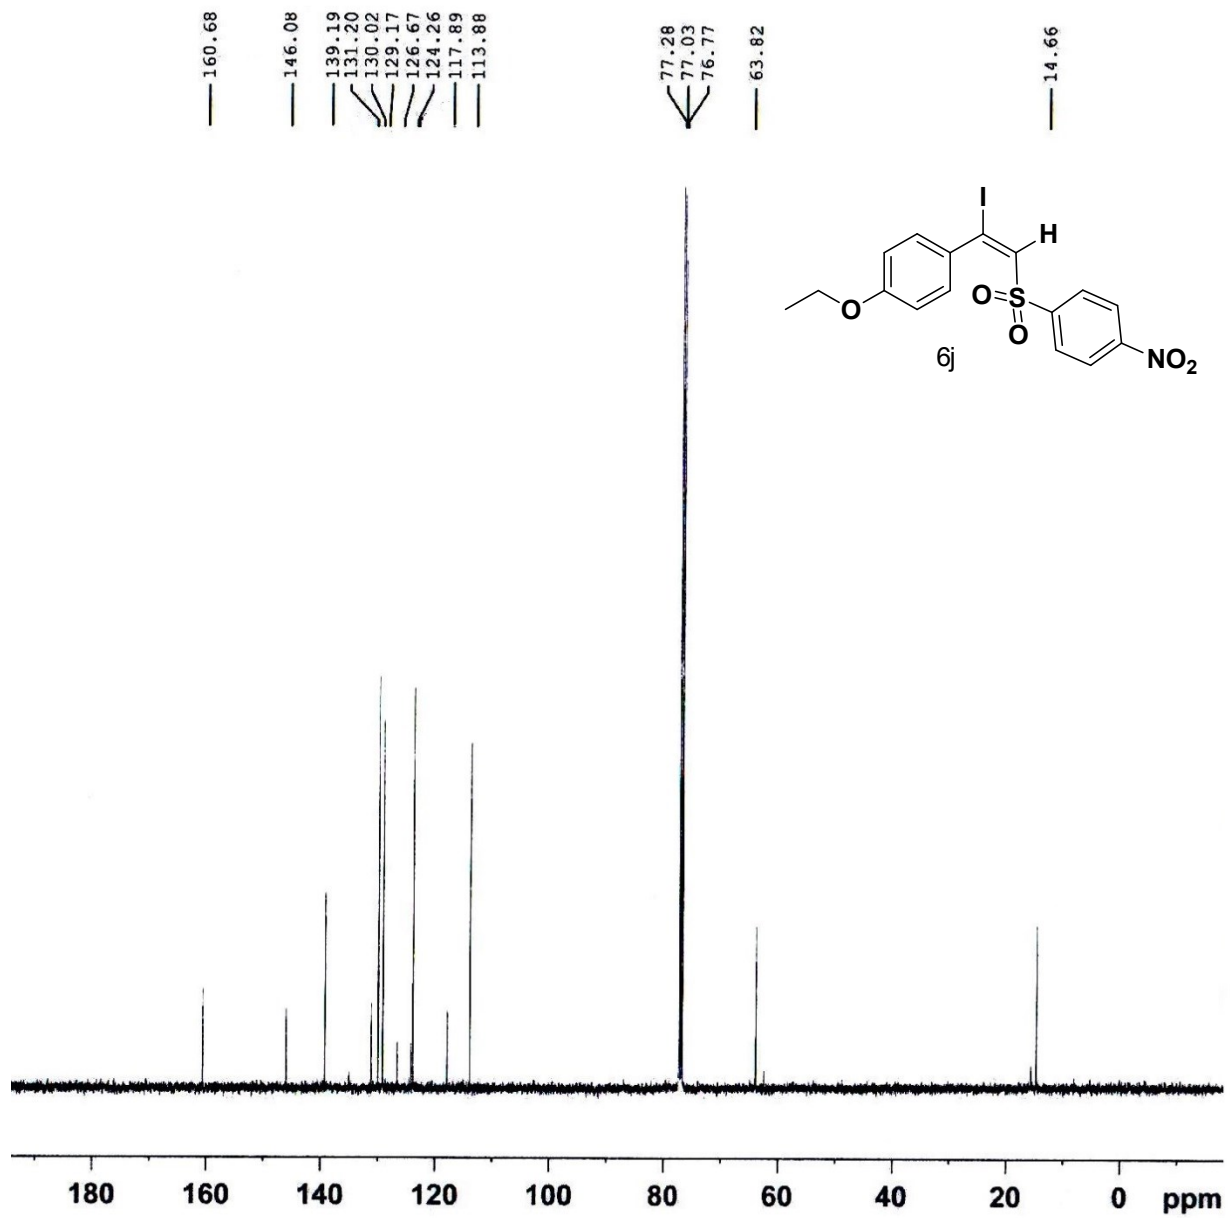

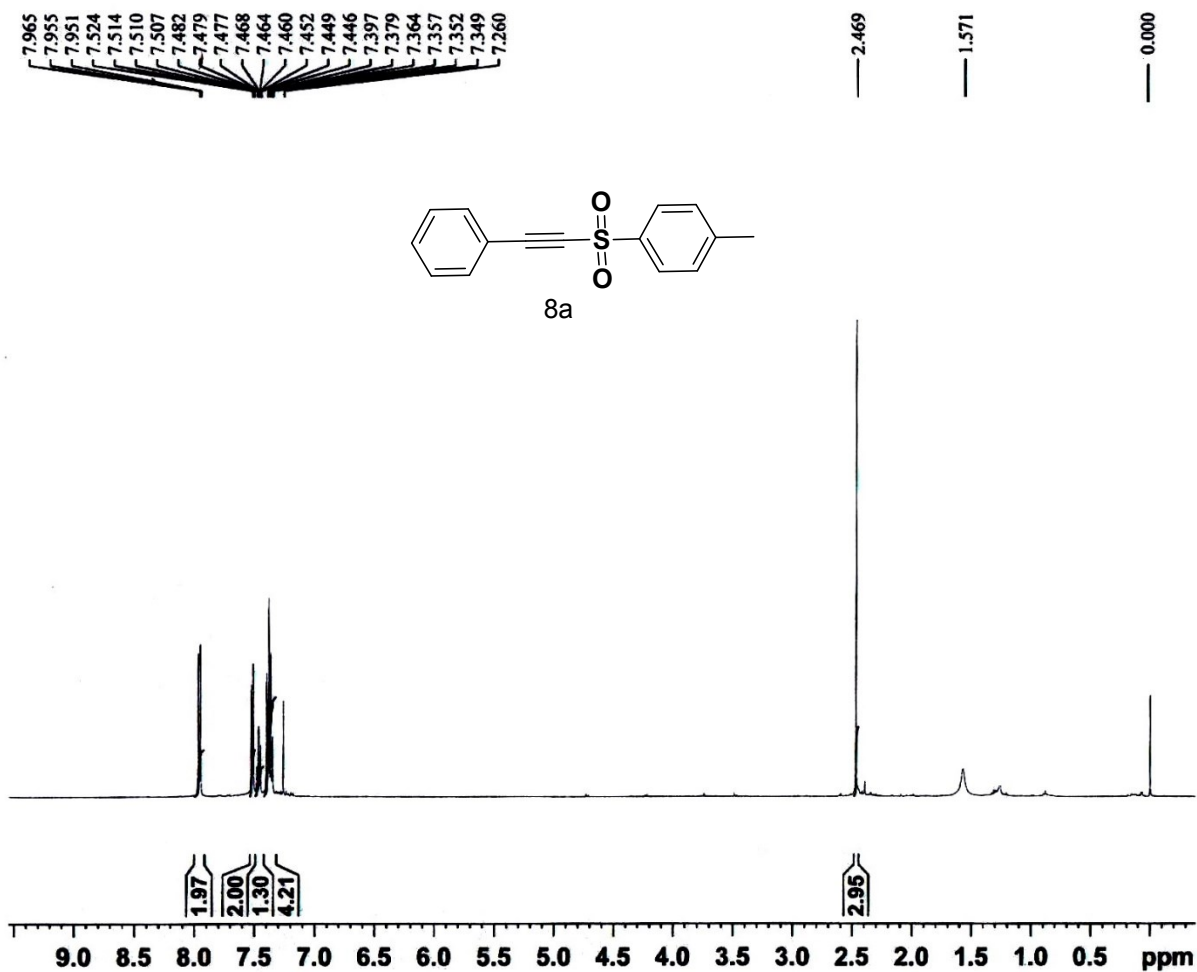

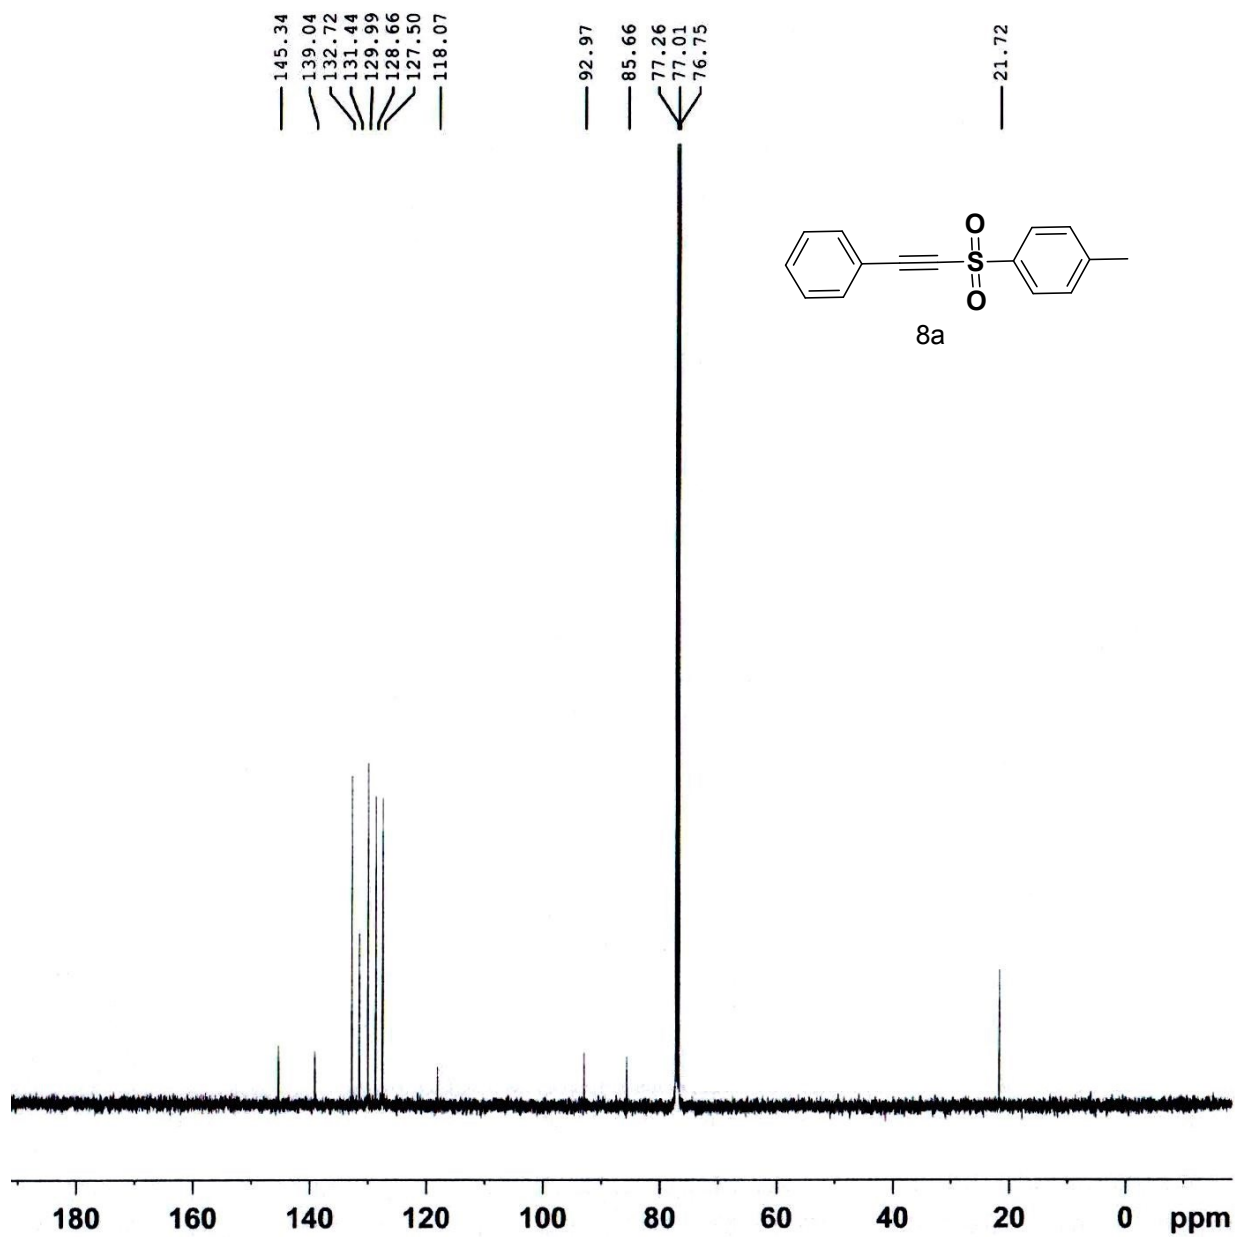

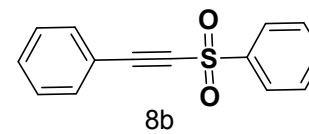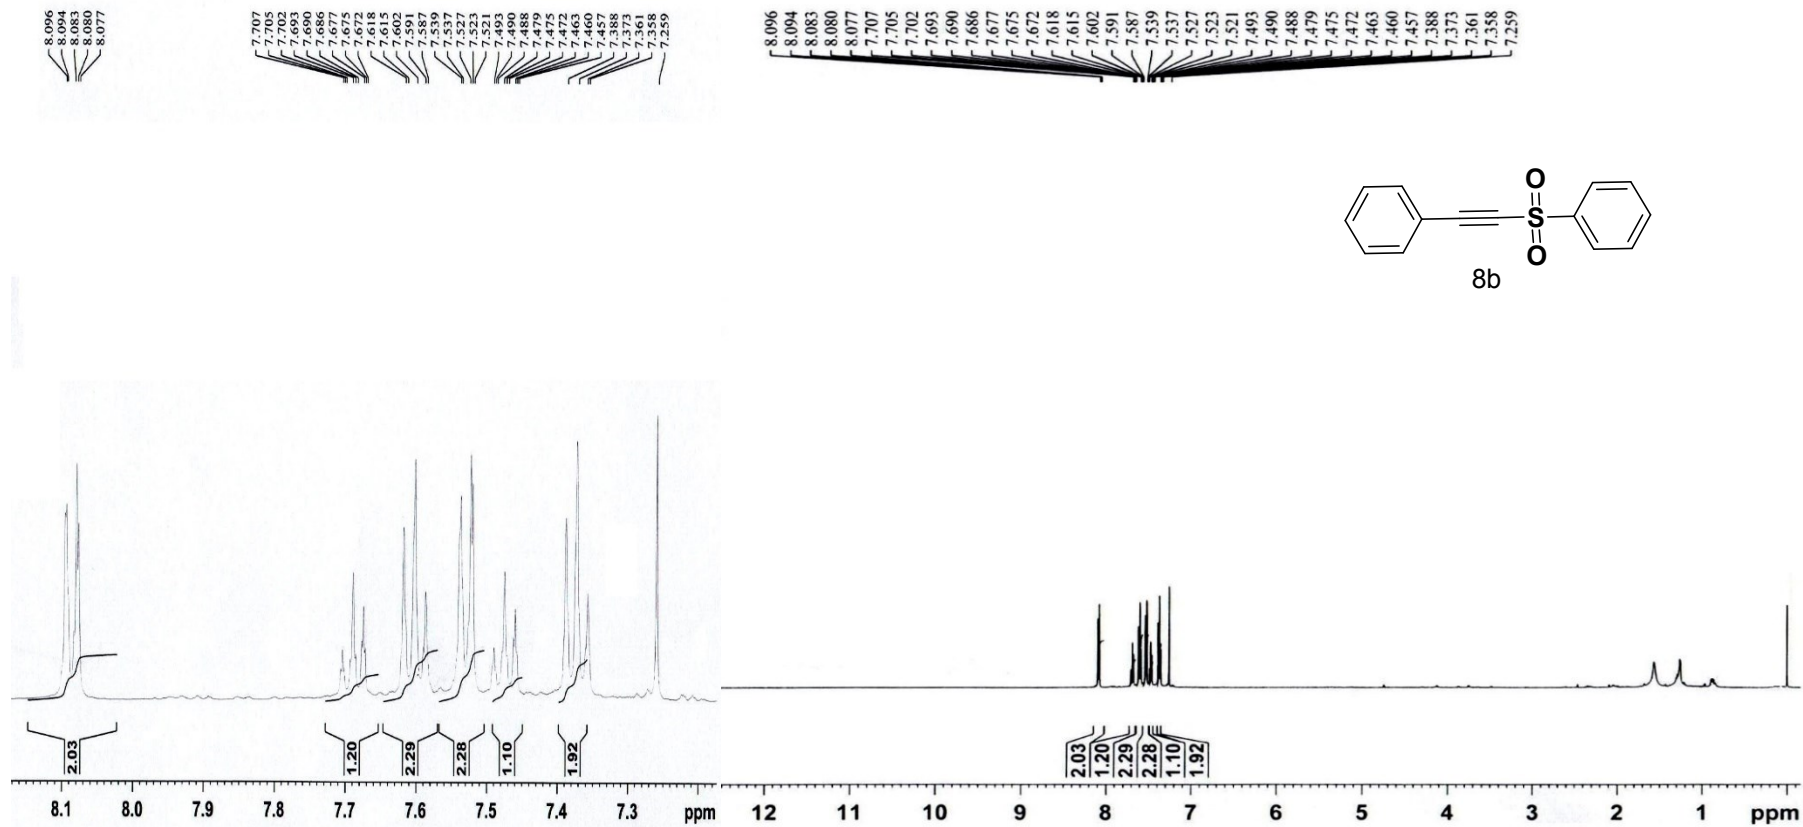

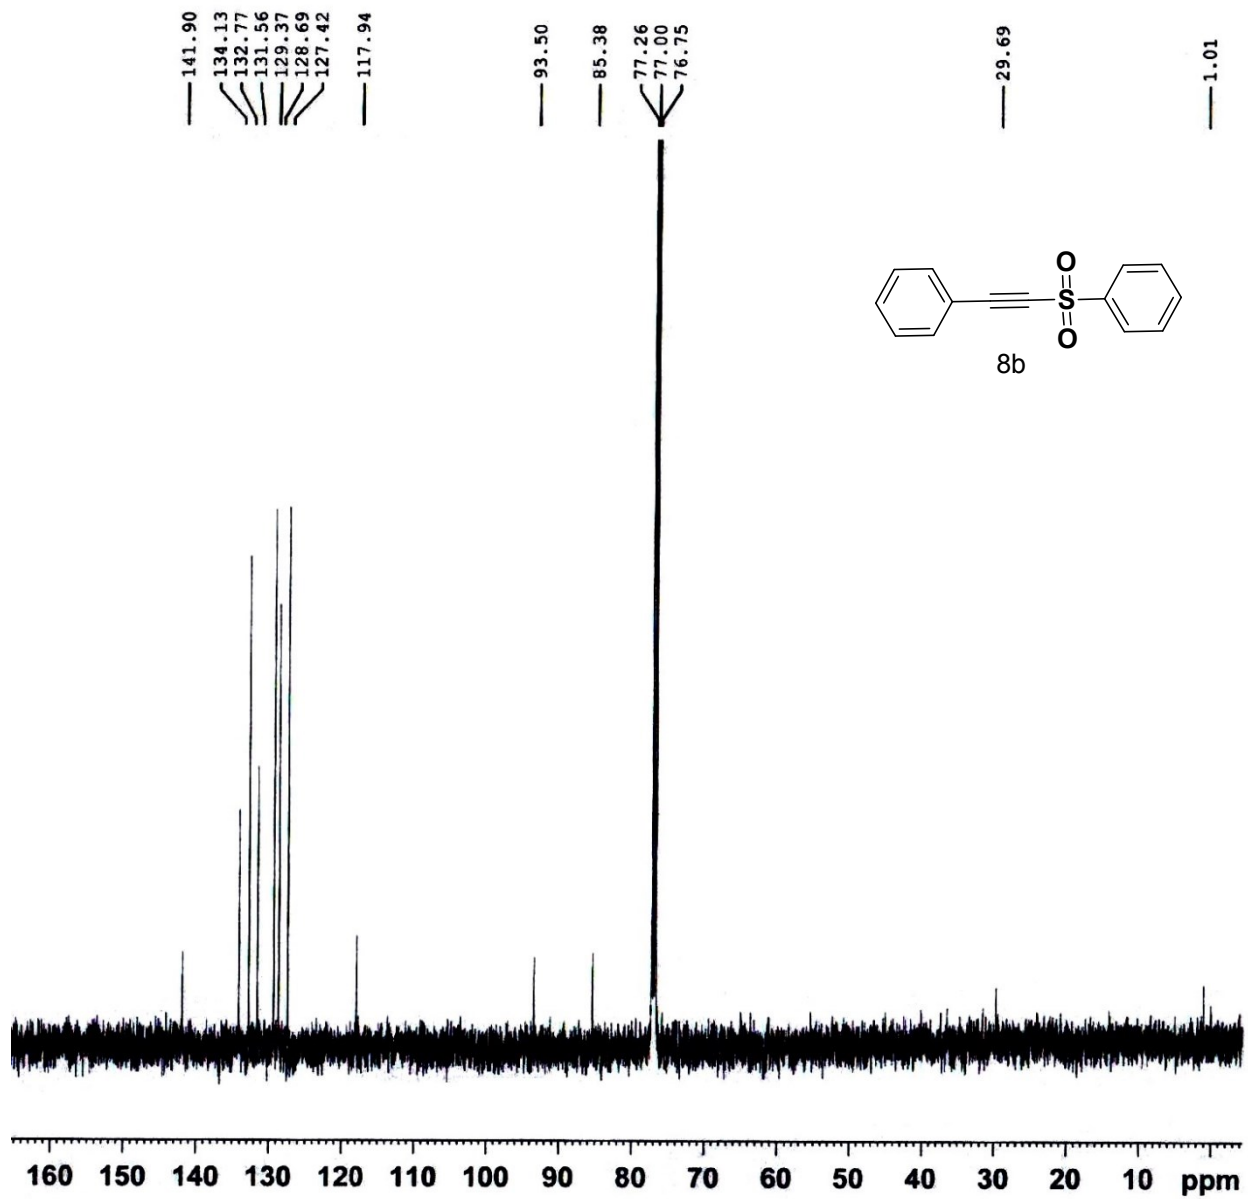

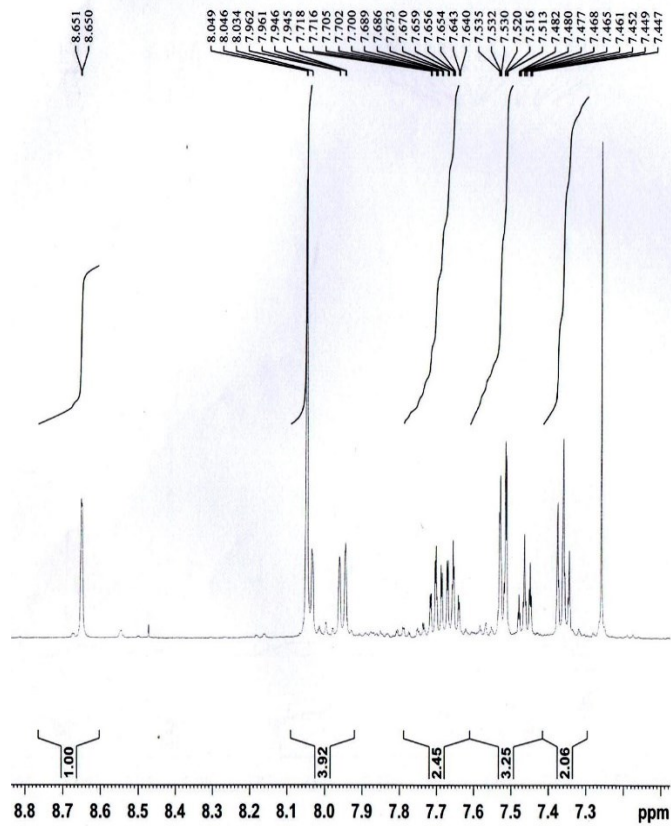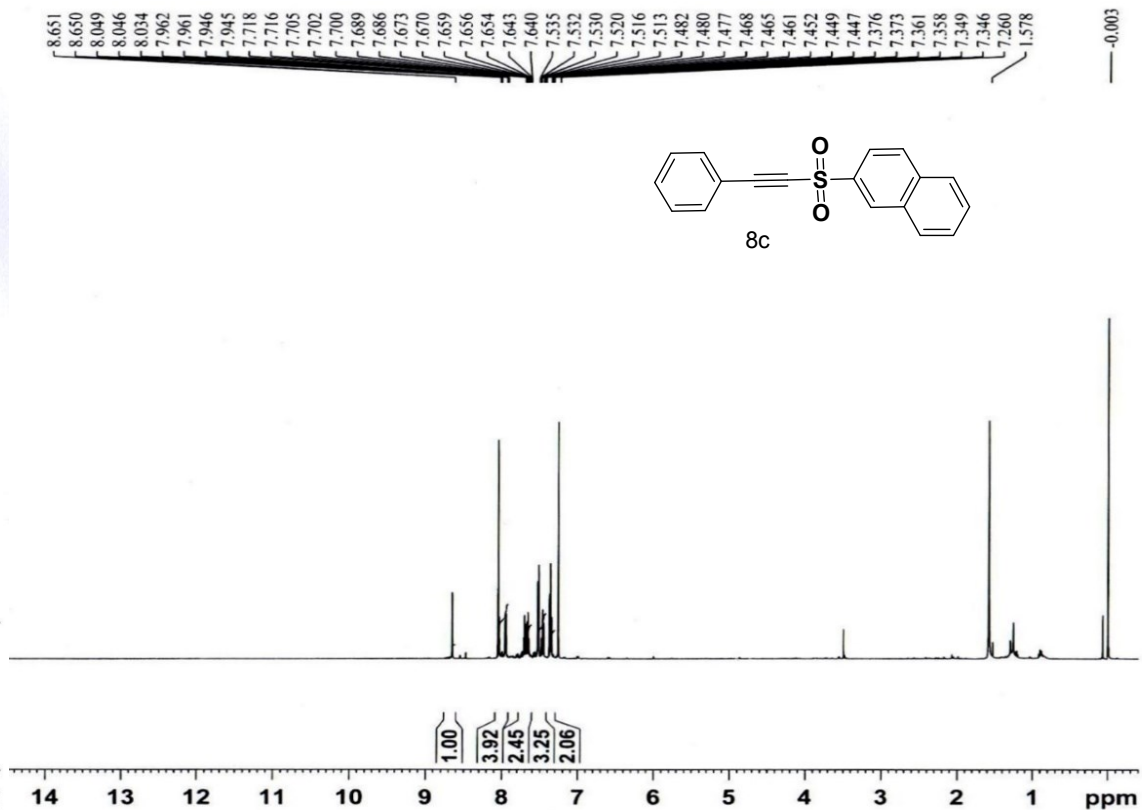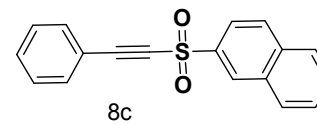



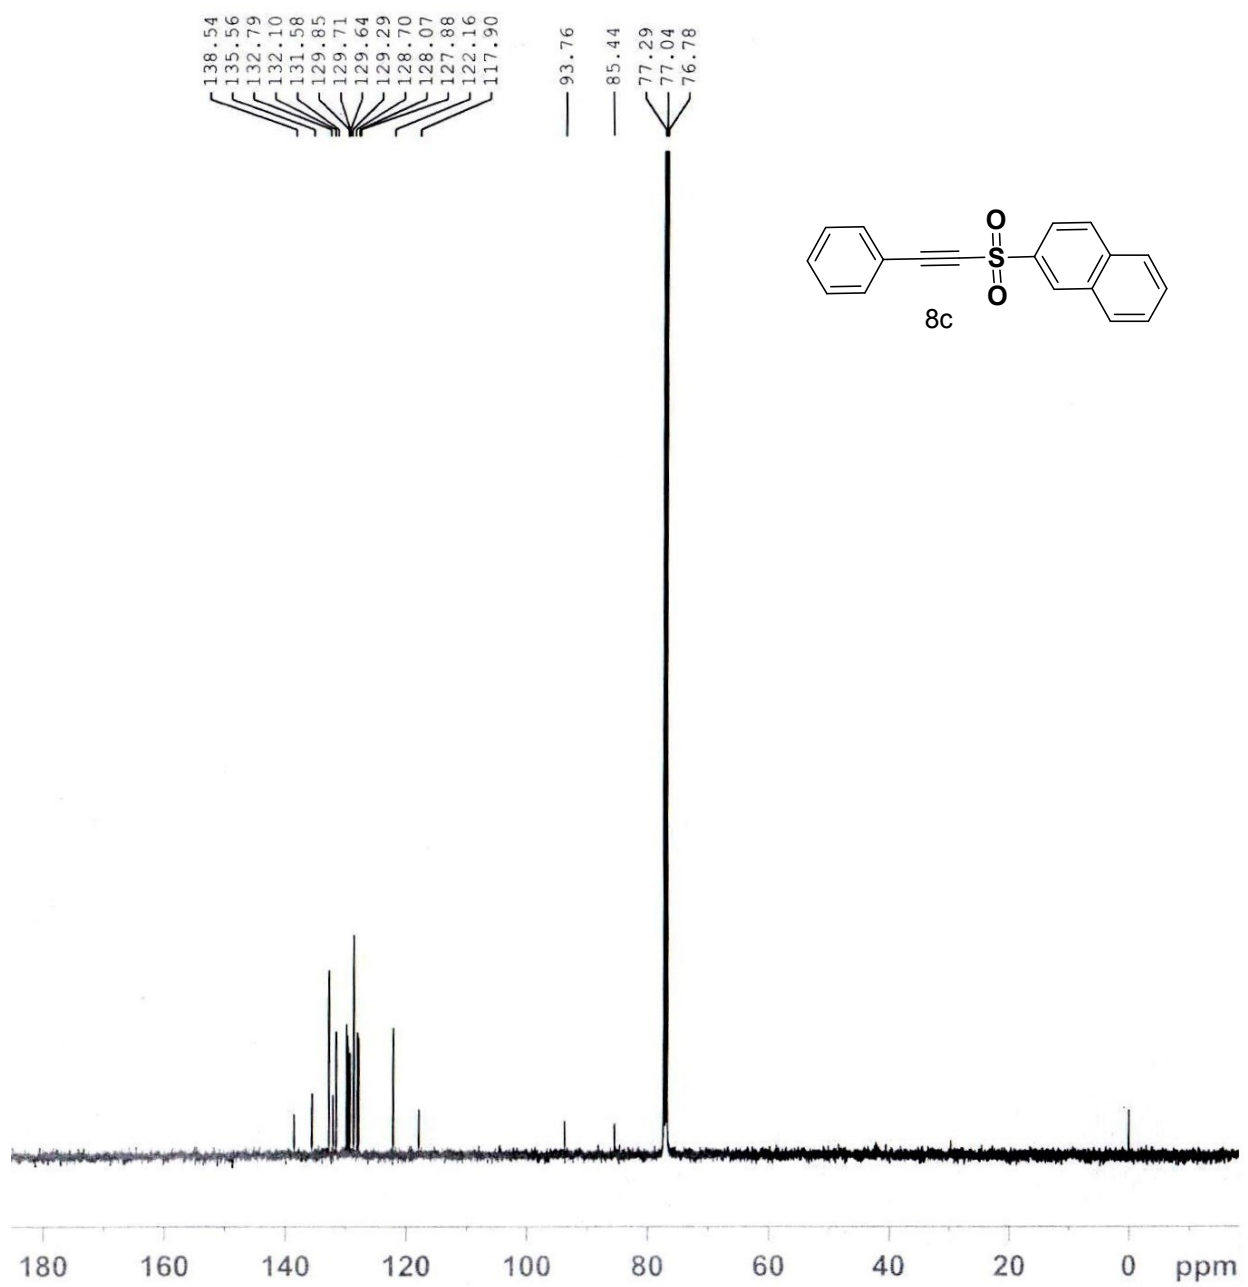

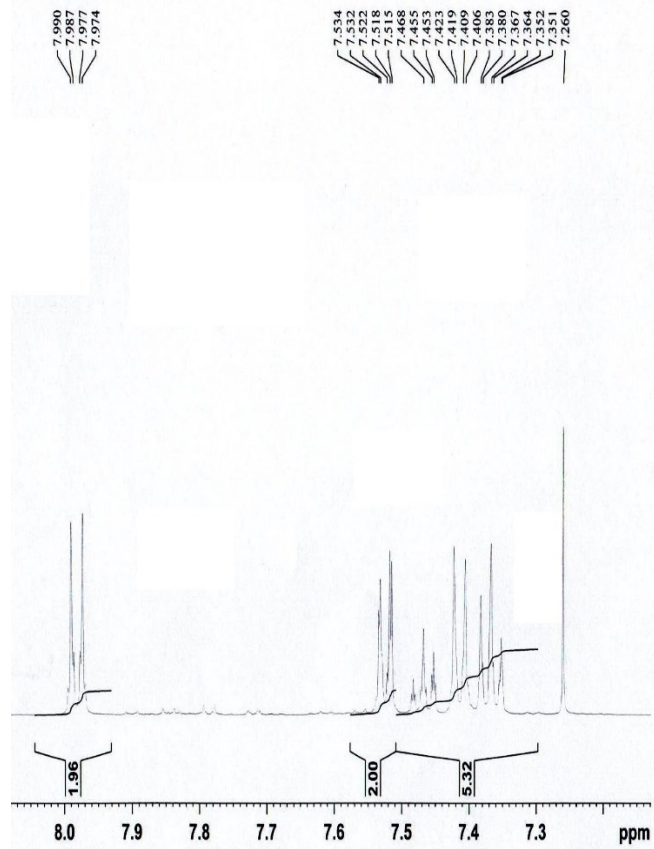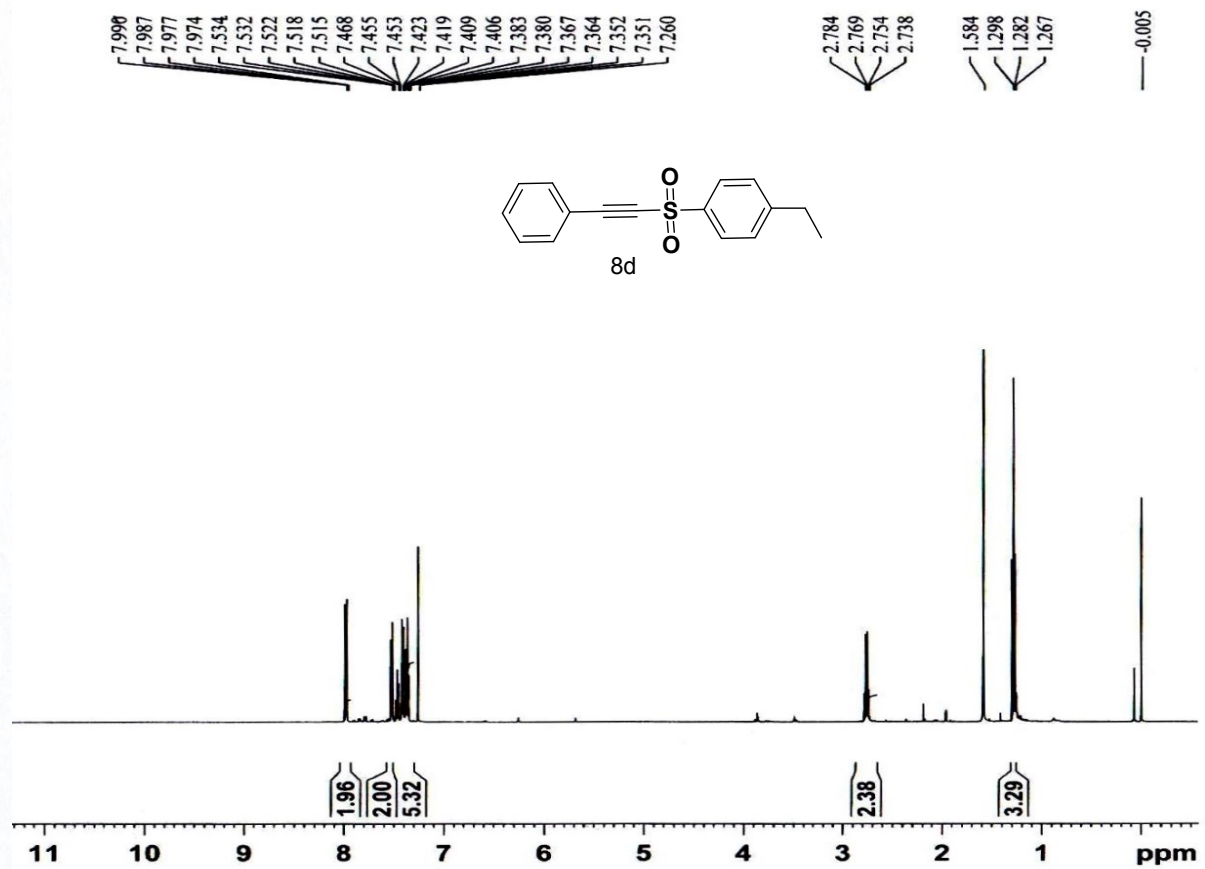

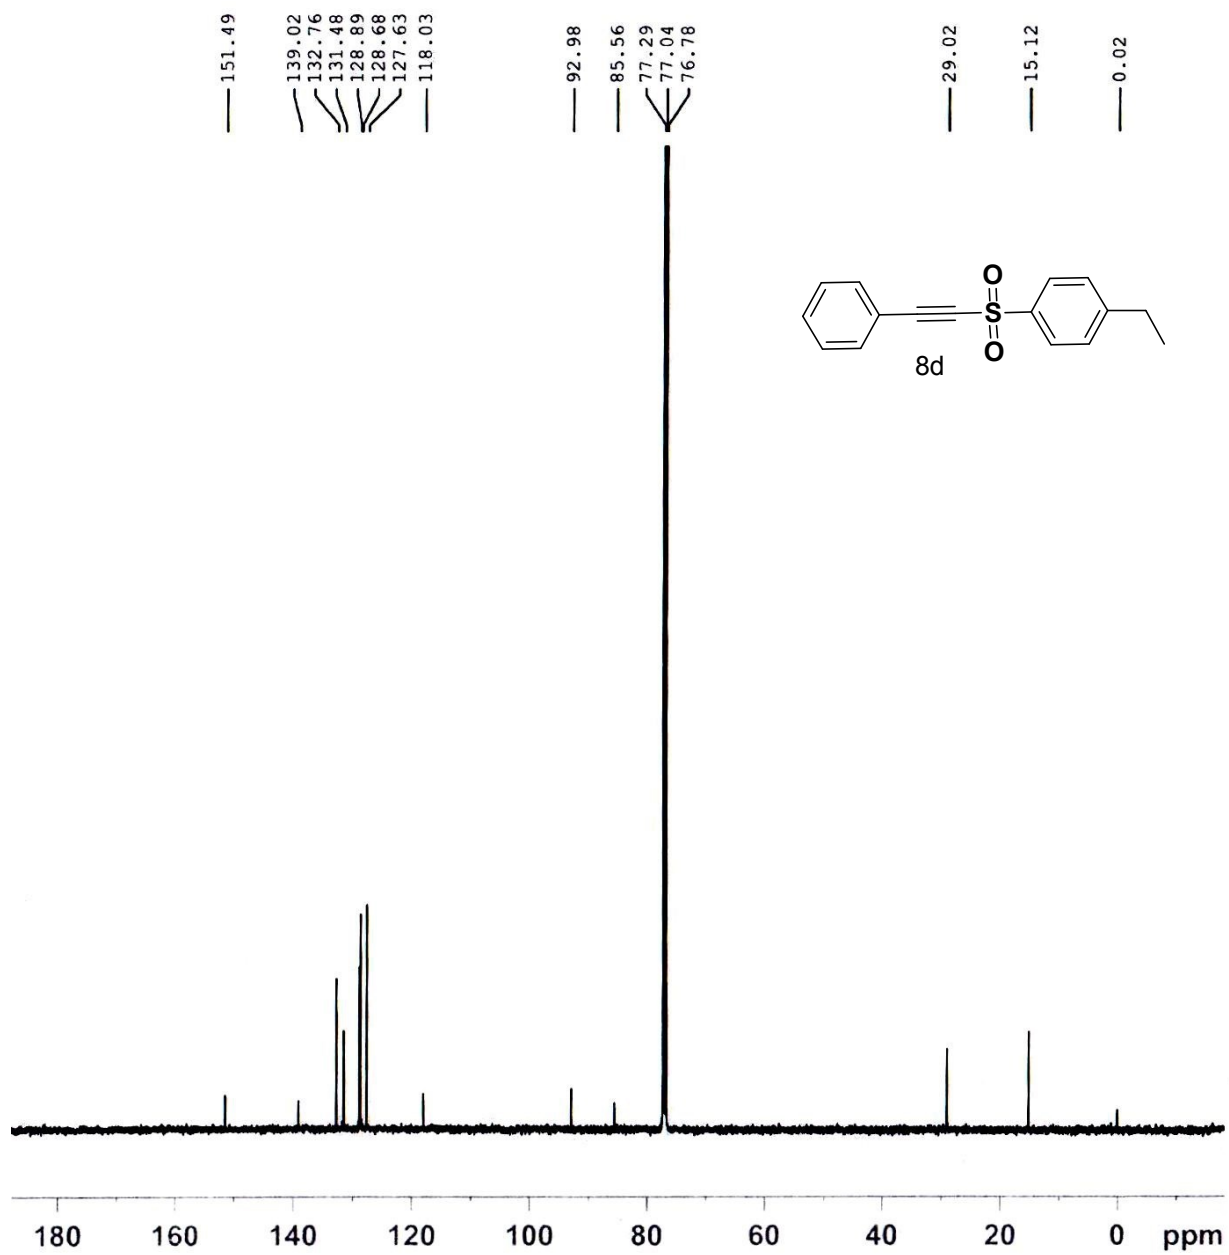

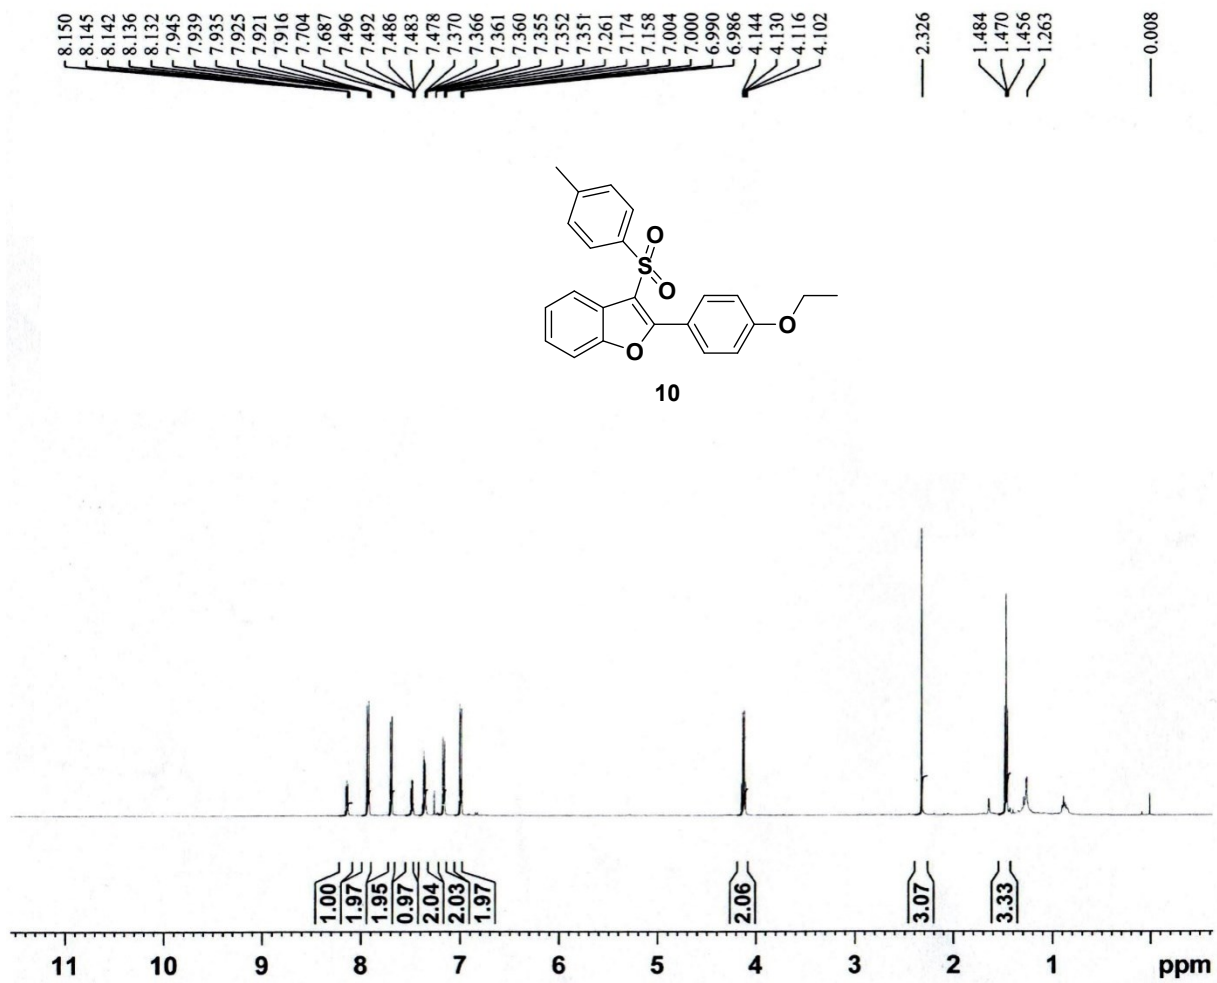

161.14  
159.07  
152.98  
144.04  
139.71  
131.79  
129.60  
126.65  
125.85  
125.59  
124.46  
121.53  
120.36  
117.27  
114.19  
111.27

77.32  
77.07  
76.82

63.69

29.73

21.55

14.78

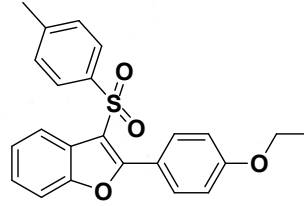

10

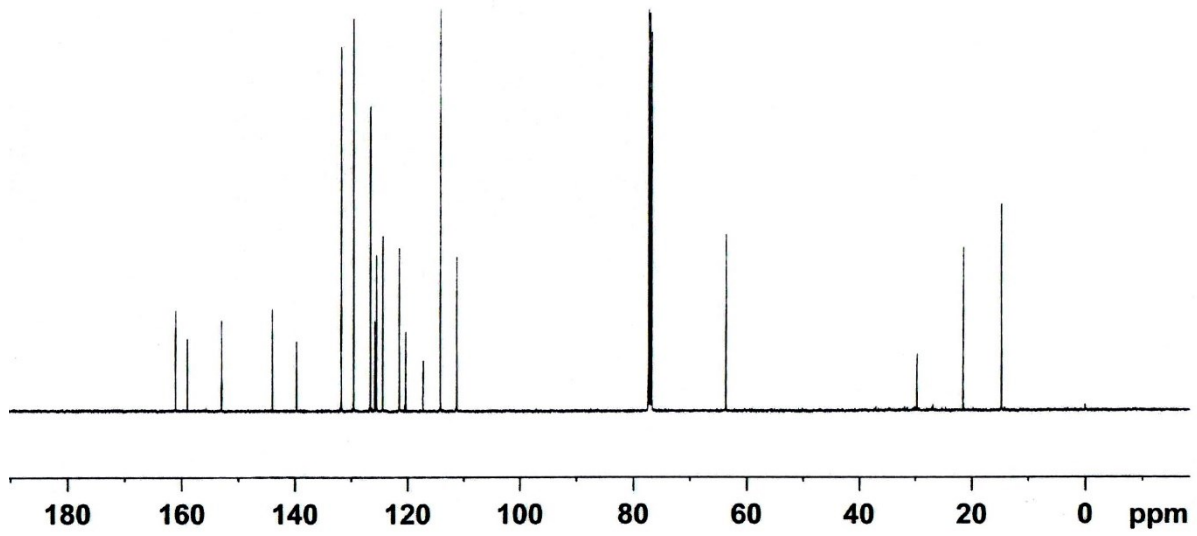

Supplement: d1ob00036e1.pdf [file d1ob00036e1.pdf]
